# Supplementary material for: What is usual care for teenagers expecting their first child in England? A process evaluation using key informant mapping and participant survey as part of the Building Blocks randomised controlled trial of specialist home visiting
Source: PubMed Central journal article supplement (PMC5942429; doi:10.1136/bmjopen-2017-020152), 2018-05-05
Supplement: bmjopen-2017-020152.draft_revisions.pdf [file bmjopen-2017-020152.draft_revisions.pdf]

# BMJ Open

BMJ Open is committed to open peer review. As part of this commitment we make the peer review history of every article we publish publicly available.

When an article is published we post the peer reviewers' comments and the authors' responses online. We also post the versions of the paper that were used during peer review. These are the versions that the peer review comments apply to.

The versions of the paper that follow are the versions that were submitted during the peer review process. They are not the versions of record or the final published versions. They should not be cited or distributed as the published version of this manuscript.

BMJ Open is an open access journal and the full, final, typeset and author-corrected version of record of the manuscript is available on our site with no access controls, subscription charges or pay-per-view fees (<http://bmjopen.bmj.com>).

If you have any questions on BMJ Open's open peer review process please email [info.bmjopen@bmj.com](mailto:info.bmjopen@bmj.com)

# BMJ Open

## Understanding and measuring usual care in a trial of a complex home visiting intervention: key informant mapping and participant survey within a randomised controlled trial

|                               |                                                                                                                                                                                                                                                                                                                                                                                                                                                                                                                           |
|-------------------------------|---------------------------------------------------------------------------------------------------------------------------------------------------------------------------------------------------------------------------------------------------------------------------------------------------------------------------------------------------------------------------------------------------------------------------------------------------------------------------------------------------------------------------|
| Journal:                      | <i>BMJ Open</i>                                                                                                                                                                                                                                                                                                                                                                                                                                                                                                           |
| Manuscript ID                 | bmjopen-2017-020152                                                                                                                                                                                                                                                                                                                                                                                                                                                                                                       |
| Article Type:                 | Research                                                                                                                                                                                                                                                                                                                                                                                                                                                                                                                  |
| Date Submitted by the Author: | 27-Oct-2017                                                                                                                                                                                                                                                                                                                                                                                                                                                                                                               |
| Complete List of Authors:     | Robling, Michael; Cardiff University, Centre for Trials Research<br>Cannings John, Rebeca; Cardiff University, Centre for Trials Research<br>Channon, Sue; Cardiff University, Centre for Trials Research<br>Hood, Kerenza; Cardiff University, South East Wales Trials Unit, Centre for Trials Research<br>Moody, Gwenllian; Cardiff University, Centre for Trials Research<br>Poole, Ria; Cardiff University, Medicine<br>Sanders, Julia; School of Healthcare Sciences, Room 12:15, Eastgate House, 35-43 Newport Road |
| Keywords:                     | Organisation of health services < HEALTH SERVICES ADMINISTRATION & MANAGEMENT, PAEDIATRICS, Child protection < PAEDIATRICS, PUBLIC HEALTH                                                                                                                                                                                                                                                                                                                                                                                 |
|                               |                                                                                                                                                                                                                                                                                                                                                                                                                                                                                                                           |

SCHOLARONE™  
Manuscripts

c:\programdata\activepdf\dc\_ent\tmp\6c500b\27691771\_file000002\_639940258.docx

**Title: Understanding and measuring usual care in a trial of a complex home visiting intervention: key informant mapping and participant survey within a randomised controlled trial**

**Corresponding author:**

**Prof Mike Robling**  
**Centre for Trials Research, Cardiff University**  
**Neuadd Meirionnydd, Heath Park, Cardiff. CF14 4YS**  
[roblingmr@cardiff.ac.uk](mailto:roblingmr@cardiff.ac.uk)  
**+44 (0)29 2068 7177**

**Authors:**

- Mike Robling, Centre for Trials Research, Cardiff University, Cardiff, Wales, UK
- Rebecca Cannings-John, Centre for Trials Research, Cardiff University, Cardiff, Wales, UK
- Sue Channon, Centre for Trials Research, Cardiff University, Cardiff, Wales, UK
- Kerry Hood, Centre for Trials Research, Cardiff University, Cardiff, Wales, UK
- Gwen Moody, Centre for Trials Research, Cardiff University, Cardiff, Wales, UK
- Ria Poole, School of Medicine, Cardiff University, Cardiff, Wales, UK
- Julia Sanders, School of Healthcare Sciences, Cardiff University, Cardiff, Wales, UK

**Key words:** Public health, child health, nursing, randomised trial

**Current abstract word count:** 250

**Current manuscript word count:** 3000

**Reference count:** 17

c:\programdata\activepdf\dc\_ent\tmp\6c500b\27691771\_file000002\_639940258.docx

1  
2  
3  
4 **Title: Understanding and measuring usual care in a trial of a complex home visiting**  
5 **intervention: key informant mapping and participant survey within a randomised**  
6 **controlled trial**

7 **Abstract**

8  
9 **Objectives**

10 We compared the US-derived Family Nurse Partnership (FNP) home visiting programme  
11 when added to usually provided health and social care in England for teenage first-time  
12 mothers, to usual care alone. We aimed to: establish the nature of usual care to clarify what  
13 FNP was being added to, measure service usage and assess performance bias in provision  
14 of core usual care.  
15

16 **Design**

17 Process evaluation integrated into a trial. Local service professionals completed a survey  
18 mapping local health and social care services in seven domains. This focused on services  
19 available to young women, especially those relevant to pregnant teenagers. Descriptive data  
20 were assessed thematically to establish the range of services. A second round of quantitative  
21 data collection with FNP supervisors enumerated service provision by site. Services identified  
22 were included in participant trial follow-up interviews to quantify usage.  
23

24 **Setting**

25 Eighteen trial sites in England comprising partnerships of healthcare and local authority  
26 organisations.  
27

28 **Outcomes**

29 Descriptive framework of services. Rates of service usage reported by trial participants.  
30

31 **Results**

32 161 separate services were identified, with multiple service models in each domain, broadly  
33 categorised as universal or specialist (eg for teenage mothers). FNP supervisors identified  
34 30-63 universal services per site and 22-67 specialist services. Use of core services of  
35 maternity care and health visiting show broad equivalence for the former by trial arm and only  
36 small differences for the latter. Participants accessed a wide range of services.  
37

38 **Conclusions**

39 A large number of universal and specialist services, across several domains were available  
40 and accessed by teenage mothers, potentially limiting the incremental benefit achievable via  
41 an enhanced supportive home visiting service. Variation in health visitor support may reflect  
42 expected progressive universal support with little evidence of compensatory practice due to  
43 FNP's presence. Measuring usual care in complex public health settings is challenging and  
44 essential.  
45  
46  
47  
48  
49  
50  
51  
52  
53  
54  
55  
56  
57  
58  
59  
60

c:\programdata\activepdf\dc\_ent\tmp\6c500b\27691771\_file000002\_639940258.docx

### Strengths and limitations of this study

- Local stakeholders with existing knowledge about a range of relevant services have enabled the development of a rich picture of what may be usually available care for teenagers expecting their first child.
- Mapping these services provides a detailed understanding of what the community based control condition in our trial comprised, something which is infrequently available in many trials of home visiting
- Changes over time, and within and between site differences in how services are configured, perceived and understood means that a statement about all locally relevant services is unlikely to be definitive.
- Although we have an understanding about how services were similarly or differently accessed by intervention and control participants in the trial, the intensity and duration of individual sessions for non-FNP services is not known.
- Some bias is likely despite relatively high trial follow-up rates, although other analyses show only minimal differences between those recruited and followed-up.

c:\programdata\activepdf\dc\_ent\tml\6c500b\27691771\_file000002\_639940258.docx

## INTRODUCTION

Individual, social, and economic circumstances faced by teenage mothers can challenge a successful start for their children. Responding in 2006, the Government in England adopted a preventative US-derived programme of nurse-led intensive home-visiting, the Family Nurse Partnership (FNP). Specially trained family nurses support first-time mothers through up to 64 home visits starting in early pregnancy and until the child reaches their second birthday. In three US trials, the programme has been evaluated with differing socio-demographic populations, justifying initial testing in a UK context.<sup>1-3</sup>

Following an implementation evaluation, 18 English sites participated in the Building Blocks trial (ISRCTN23019866) of the programme's effectiveness recruiting 1645 teenagers expecting their first child.<sup>4-8</sup> Women were recruited before 24 weeks gestation, lived within geographical areas served by the FNP team and spoke at least conversational English. Assessing over 60 short-term outcomes (to 24 months post-partum) in domain areas of pregnancy and birth, child development, and maternal life-course, four primary outcomes of programme and policy interest were prioritised.

We compared FNP when added to usually provided health and social care to usual care alone. In the absence of comprehensive public healthcare in the US, across all three previous evaluations the counterfactual was reported as obstetric office-based antenatal care, paediatric developmental screening, referral at specified time points and free transport to office-based consultations. Elevating the control condition to just more than simply no care, the augmented control condition was not further described. Given the provision of free universal health services in the UK, the ethical trial comparator was an active control condition. However, it was expected that what would be available to young families may be complex and vary by site and over time.

We aimed to map and quantify usually provided care and so clarify the trial's control condition, the service context into which FNP was introduced and allow exploration of any performance bias affecting validity of the trial comparison.

## METHODS

We first elicited and mapped usual services available locally at each trial sites (each site comprised collaborative partnerships between National Health Service (NHS) organisations and local authorities), and second enumerated services accessed by participants in both trial arms.

### *Eliciting and mapping services*

A mapping tool was drafted using an Excel worksheet following discussion within the research team. This sought to identify services available for pregnant teenagers and young families across seven initial domains: midwifery, health visiting (specialist public health nurses), education, housing, social care and other services (eg, Children's Centres) and funding schemes specifically for young parents). The tool was piloted with local coordinators at three sites who described service characteristics (e.g., provider, eligibility criteria) and were debriefed by telephone interview to assess feasibility. An amended version, which incorporated completion instructions (Appendix 1), a worked example and study information, was circulated via email to site contacts across health and social care nominated by local FNP project leads. Site contacts were encouraged to engage heads of services and other local professional staff (e.g. housing support workers) to provide detail about specific services or domains and to provide documentary details on services if available. Respondents were asked to provide details of "routinely provided services within their local authority which may be provided to young women, but may be especially relevant to pregnant teenagers".

Summative content analysis was used to identify missing or incomplete data in submitted returns, and followed up if necessary.<sup>9</sup> Data were analysed thematically by researchers who also involved service experts to review the developing coding framework, which was then applied to the data using NVivo 8.<sup>10</sup>

c:\programdata\activepdf\dc\_ent\tmp\6c500b\27691771\_file000002\_639940258.docx

1  
2  
3  
4 A second round of online data collection addressing the same domains aimed to consolidate  
5 and confirm information already provided and to reduce variation that may be solely  
6 attributable to reporting bias.

#### 7 *Enumerating service by trial participants*

8 Access to supportive services within each core domain was measured in the trial's follow-up  
9 telephone interview schedule at late pregnancy, and 6, 12 and 18 months postpartum.<sup>7</sup> These  
10 included use of childcare, primary (eg, midwifery, GP, health visiting) and secondary (eg,  
11 A&E, Out-patient, In-patients) healthcare attendances, sexual health (contraceptive services),  
12 formal education, Connexions, support with housing, and a range of additional support  
13 services. At 24 months additional questions asked about financial support.

14 Some data informed the separately reported cost-effectiveness analysis.<sup>11</sup> In the current  
15 analysis we describe the pattern of core service usage (eg, health visiting, midwifery,  
16 housing) for those in both trial arms, and the level of support provided additionally via FNP  
17 (for FNP clients, the Healthy Child Programme was delivered by FNs rather than by health  
18 visitors). Data on the latter were provided via the FNP national unit's Information System. Use  
19 of services was analysed descriptively and is reported by service domain showing counts and  
20 proportions for those in the two trial arms separately. Multivariable logistic regression was  
21 used to explore whether certain maternal characteristics were associated with level of  
22 observed HV support. Univariable association were screened using a  $p < 0.10$  cut off and  
23 retained in the final multivariable model. Estimates are shown as odds ratios (ORs) and 95%  
24 confidence intervals (CIs).

## 25 26 **RESULTS**

### 27 *Eliciting and mapping services*

28  
29  
30 In round one, all sites responded, with at least six individual informants contributing data per  
31 site. A varying level of detail was provided about identified services. In general spreadsheets  
32 circulated to multiple stakeholders were more comprehensively completed.

33  
34 Similar services within any one domain were subsequently grouped together even if labelled  
35 differently by informants. This resulted in 161 identified services, some with similar aims. An  
36 example was that of education provided to pregnant teenagers aged under 16 years old with  
37 eight different named services. In round two, the 161 services were listed, categorised into 12  
38 service domains (the original domains plus 'other services' sub-divided on the basis of stage  
39 1 responses into childcare, complex needs, Connexions, drug and alcohol, mental health,  
40 third sector, and sexual health).

41  
42 The total number of services identified per site ranged from 52 to 113. These included  
43 between 26 and 53 universal services and between 22 and 86 locally available / specialist  
44 services. Services were provided by public, private and third sector organisations and  
45 collectively delivered direct care, support or guidance. Examples of Specialist and Locally  
46 available services are shown in table 1.  
47  
48  
49  
50  
51  
52  
53  
54  
55  
56  
57  
58  
59  
60

c:\programdata\activepdf\dc\_ent\tmp\6c500b\27691771\_file000002\_639940258.docx

**Table 1: Service mapping – examples of services<sup>1</sup> described by study sites<sup>3</sup>**

| <b>Domain</b>                          | <b>Specialist services</b> - specifically for pregnant teenagers or younger parents                                                                                                                                   | <b>Locally Available services</b> - with a specialist nature and eligibility criteria, but not necessarily designed for teenage parents                                                                                                                                            |
|----------------------------------------|-----------------------------------------------------------------------------------------------------------------------------------------------------------------------------------------------------------------------|------------------------------------------------------------------------------------------------------------------------------------------------------------------------------------------------------------------------------------------------------------------------------------|
| <b>Education</b>                       | <ul style="list-style-type: none"> <li>• Schools / colleges with provision for teenage mums</li> <li>• Teenage pregnancy support services</li> <li>• Accredited courses with free child care for under 25s</li> </ul> | <ul style="list-style-type: none"> <li>• Home learning programmes</li> </ul>                                                                                                                                                                                                       |
| <b>Housing</b>                         | <ul style="list-style-type: none"> <li>• Teenage parents' scheme: training in independent living skills</li> <li>• Supported housing: young vulnerable women or teenage parents</li> </ul>                            | <ul style="list-style-type: none"> <li>• Outreach support service aimed at young homeless people under 18</li> <li>• Mother and Baby Hostel</li> </ul>                                                                                                                             |
| <b>Health Visiting</b>                 |                                                                                                                                                                                                                       | <ul style="list-style-type: none"> <li>• Antenatal contact at home or in midwife-led antenatal clinics</li> <li>• Minor ailments sessions run by health visitors</li> </ul>                                                                                                        |
| <b>Midwifery</b>                       | <ul style="list-style-type: none"> <li>• Teenage pregnancy midwives</li> <li>• Antenatal clinics run by midwives in schools</li> </ul>                                                                                | <ul style="list-style-type: none"> <li>• Midwives based in Children's Centres</li> </ul>                                                                                                                                                                                           |
| <b>Social Services</b>                 | <ul style="list-style-type: none"> <li>• Teenage pregnancy support service</li> </ul>                                                                                                                                 | <ul style="list-style-type: none"> <li>• Targeted youth support for vulnerable young people</li> <li>• Specialist therapeutic unit for young victims of sexual abuse</li> <li>• Family resource service; practical support to access universal services</li> </ul>                 |
| <b>Connexions Services<sup>2</sup></b> | <ul style="list-style-type: none"> <li>• Teenage Pregnancy Advisors help young mums-to-be and young families</li> </ul>                                                                                               | <ul style="list-style-type: none"> <li>• Provide information and guidance to Looked After young people</li> <li>• Provide support and guidance for young people leaving care</li> <li>• Provide practical help and advice for young mums who want to go back to college</li> </ul> |
| <b>Drugs, Alcohol and Smoking</b>      |                                                                                                                                                                                                                       | <ul style="list-style-type: none"> <li>• Specialist drugs and alcohol services working with police</li> <li>• Community-based young people's drugs and alcohol service</li> <li>• Smoking in Pregnancy cessation service</li> </ul>                                                |
| <b>Sexual Health</b>                   | <ul style="list-style-type: none"> <li>• Lifestyle services working with teenage parents to prevent second pregnancy</li> </ul>                                                                                       | <ul style="list-style-type: none"> <li>• Family planning services for under 25-yr-olds in community settings</li> <li>• Sexual health services for teenagers</li> <li>• Condom distribution scheme in community settings</li> </ul>                                                |



c:\programdata\activepdf\dc\_ent\tmpl\6c500b\27691771\_file000002\_639940258.docx

|                                          |                                                                                                                                                     |                                                                                                                                                                                                                                                                                                                                                                         |
|------------------------------------------|-----------------------------------------------------------------------------------------------------------------------------------------------------|-------------------------------------------------------------------------------------------------------------------------------------------------------------------------------------------------------------------------------------------------------------------------------------------------------------------------------------------------------------------------|
| <b>Mental Health services</b>            |                                                                                                                                                     | <ul style="list-style-type: none"> <li>• Specialist Children's and Adolescent Mental Health Services for eating disorders</li> <li>• Mother-and-baby units in hospitals and prisons</li> <li>• Specialist psychiatric unit for postnatal mental illness</li> </ul>                                                                                                      |
| <b>Complex Needs Childcare provision</b> | <ul style="list-style-type: none"> <li>• Support and advocacy for (pregnant) teenagers with complex needs</li> </ul>                                | <ul style="list-style-type: none"> <li>• Child development centre for pre-school children with complex needs</li> <li>• Sure Start language therapy team</li> <li>• Vulnerable baby service: targeted safeguarding prevention</li> <li>• Private, voluntary, independent childcare providers</li> <li>• Internet database on county-wide childcare provision</li> </ul> |
| <b>Local / third sector projects</b>     | <ul style="list-style-type: none"> <li>• Charity funded teen parents projects</li> <li>• Peer support sessions for teenage fathers-to-be</li> </ul> | <ul style="list-style-type: none"> <li>• Barnardo's Priory Family Centre</li> <li>• Charity funded young parents projects</li> <li>• Home Start: trained volunteers visit mums for approx. 15 months</li> </ul>                                                                                                                                                         |

1 Set information provided by local informants for each reported service included: Name of service, Narrative description, Limits on availability (eg, upper limit on number of women offered service, Location (eg, base), Level of service provision per client (eg, frequency, duration, quantity), Illustrative current caseload, Delivery setting, Client eligibility criteria, Service provider (eg, local authority), Assessment of local service variations compared to other locations

2 A government funded advisory and support service for young people aged 13-19 years old, now discontinued

3 Data collection timing: Round 1 - Data collection was requested over a six-week period from August 2009 to coincide with early stages of trial recruitment; Round 2: The survey link was sent to local FNP supervisors for completion in July 2011.

c:\programdata\activepdf\dc\_ent\tmp\6c500b\27691771\_file000002\_639940258.docx

1  
2  
3 Not all universal services were reported from all sites although these would have been  
4 available (eg, universal education provision to age 16 years). In the domains of mental health,  
5 addiction and complex needs provision a small number of sites reported no additional locally  
6 available or specialist services. No sites reported specialist health visiting services for  
7 teenagers. Fourteen sites reported the employment of specialist teenage pregnancy  
8 midwives. Details from local informants describe the type and range of services available  
9 across the range of providers and sector domains. Services were numerous, complex and in  
10 some cases with fluid boundaries facilitating multi-disciplinary interaction to support users.  
11 Individual services although provided with similar intent could vary by site, while  
12 administrative boundaries between services were shown to be fluid.

### 13 *Service usage during the trial*

14  
15 Initially 823 women were allocated to receive FNP and 822 women to Usual Care (UC) and  
16 following mandatory or elective withdrawal (including of consent), 808 and 810 women  
17 respectively completed baseline assessment.<sup>8</sup> Interviews were completed with 501 women  
18 (FNP) and 466 women (UC) at 18 months. At 24 months follow-up the number of interviews  
19 completed were 595 (FNP) and 559 (UC).

### 20 *Community health visiting, midwifery and FNP*

21 Core publicly funded services for mothers are maternity care and health visiting. The mean  
22 number of all home visits from health visitors was similar in both study arms (UC: 5.01 (SD  
23 5.51); FNP: 4.70 (SD 7.81)). Contact with health visitors in clinic was quite different with more  
24 reported by mothers in the UC arm (mean 6.31, SD 7.07) than in the FNP arm (0.70, SD  
25 2.92). The number of contacts within each reporting period up to 18 months reflects a similar  
26 pattern (table 2). The mean number of community midwifery contacts during pregnancy for  
27 the 422 UC women responding in late pregnancy was 10.69 (SD: 5.34) and for the 459 in the  
28 FNP arm was 10.68 (SD: 5.25). Women allocated to FNP received an average of 9.71, 18.63  
29 and 13.22 valid FN visits per programme phase (Pregnancy, Infancy, Toddlerhood) with  
30 average visit duration of 79.14 minutes. There was a programme attrition rate by phase of  
31 3.6%, 10.1% and 7.9% respectively (cumulative rate of 21.1%).  
32  
33  
34  
35  
36  
37  
38  
39  
40  
41  
42  
43  
44  
45  
46  
47  
48  
49  
50  
51  
52  
53  
54  
55  
56  
57  
58  
59  
60

1  
2 c:\programdata\activepdf\dc\_ent\tmp\6c500b\27691771\_file000002\_639940258.docx  
3  
4  
5  
6

7 **Table 2 Participant reported access to health services (health visitor and contraception) by follow-up (month)**

|                                          | 6            |             | 12           |             | 18           |             | Combined<br>(up to 18<br>months) |             |
|------------------------------------------|--------------|-------------|--------------|-------------|--------------|-------------|----------------------------------|-------------|
|                                          | FNP<br>n=511 | UC<br>n=470 | FNP<br>n=514 | UC<br>n=483 | FNP<br>n=501 | UC<br>n=466 | FNP<br>n=501                     | UC<br>n=466 |
| <b>Health visitor contacts Mean (SD)</b> |              |             |              |             |              |             |                                  |             |
| Home                                     | 3.07 (6.08)  | 3.35 (3.58) | 1.24 (3.67)  | 1.16 (2.63) | 0.50 (2.50)  | 0.93 (2.58) | 4.70 (7.81)                      | 5.01 (5.51) |
| Clinic                                   | 0.51 (2.12)  | 3.72 (5.04) | 0.20 (1.37)  | 1.66 (2.76) | 0.06 (0.45)  | 1.01 (2.51) | 0.70 (2.92)                      | 6.31 (7.07) |
| <b>Contraceptive services %</b>          |              |             |              |             |              |             |                                  |             |
| GP surgery                               | 42.3         | 38.3        | 41.2         | 44.1        | 38.5         | 46.1        |                                  |             |
| Family planning clinic                   | 26.2         | 19.8        | 19.6         | 18.6        | 22.6         | 18.7        |                                  |             |
| Children's centre                        | 1.4          | 0.6         | 1.0          | 0.8         | 1.0          | 0.4         |                                  |             |
| Sexual health clinic                     | 6.1          | 4.5         | 4.7          | 4.3         | 7.2          | 4.5         |                                  |             |

14  
15  
16  
17  
18  
19  
20  
21  
22  
23  
24  
25  
26  
27  
28 We explored variation in core service usage to determine whether level of observed support (<math>\leq 3</math> HV home visits / 3+ HV home visits) was directed to  
29 participants distinguishable on the basis of baseline characteristics (Table 3). Women who had ever been homeless, had a higher subjectively defined social  
30 status, and poorer mental health were associated with 4 or more visits, while visit frequency also varied by trial site (but was not subsequently entered into the  
31 final model) (table 3). Homelessness (OR=1.80, 95% CI=1.02 to 3.17) and subjective social status (OR=1.13, 95% CI=1.01 to 1.27) were the only two  
32 individual characteristics that remained independently associated with visit numbers.  
33  
34  
35  
36  
37  
38  
39  
40  
41  
42  
43  
44  
45  
46  
47

c:\programdata\activepdf\dc\_ent\tml\6c500b\27691771\_file000002\_639940258.docx

**Table 3 Baseline predictors of number of home visits from health visitor by six months postpartum for women in usual care arm**

|                                       | <b>3 or fewer visits<br/>(N=155)</b> |                                    | <b>4 or more visits<br/>(N=312)</b> |                                    | <b>Overall<br/>N=467</b>               | <b>Univariate<br/>assoc.<sup>g</sup></b> |
|---------------------------------------|--------------------------------------|------------------------------------|-------------------------------------|------------------------------------|----------------------------------------|------------------------------------------|
|                                       | N                                    | Median (IQR <sup>a</sup> )<br>or % | N                                   | Median (IQR <sup>a</sup> )<br>or % | Median (IQR <sup>a</sup> )<br>or N (%) |                                          |
| <b>Age in years</b>                   |                                      | 17.9<br>(17.1 – 18.7)              |                                     | 17.8<br>(16.9 – 18.9)              | 17.8<br>(16.9 – 18.8)                  | 0.721                                    |
| <b>Ethnic background</b>              |                                      |                                    |                                     |                                    |                                        | 0.070                                    |
| White                                 | 130                                  | 83.9                               | 276                                 | 88.5                               | 406 (86.9)                             |                                          |
| Mixed                                 | 5                                    | 3.2                                | 18                                  | 5.9                                | 23 (4.9)                               |                                          |
| Asian                                 | 3                                    | 1.9                                | 4                                   | 1.3                                | 7 (1.5)                                |                                          |
| Black                                 | 15                                   | 9.7                                | 13                                  | 4.2                                | 28 (6.0)                               |                                          |
| Other                                 | 2                                    | 1.3                                | 1                                   | 0.3                                | 3 (0.6)                                |                                          |
| <b>Relationship status</b>            |                                      |                                    |                                     |                                    |                                        | 0.433                                    |
| Married                               | 4                                    | 2.6                                | 3                                   | 1.0                                | 7 (1.5)                                |                                          |
| Separated                             | 13                                   | 8.4                                | 34                                  | 10.9                               | 47 (10.1)                              |                                          |
| Closely inv. / boyfriend              | 120                                  | 77.4                               | 244                                 | 78.2                               | 364 (77.9)                             |                                          |
| Just friends                          | 18                                   | 11.6                               | 31                                  | 9.9                                | 49 (10.5)                              |                                          |
| <b>Live with father of baby</b>       |                                      |                                    |                                     |                                    |                                        | 0.512                                    |
| Yes                                   | 42                                   | 27.1                               | 71                                  | 22.8                               | 113 (24.2)                             |                                          |
| No                                    | 108                                  | 69.7                               | 212                                 | 67.9                               | 320 (68.5)                             |                                          |
| Not answered                          | 5                                    | 3.2                                | 29                                  | 9.3                                | 34 (7.3)                               |                                          |
| <b>Subjective social status:</b>      |                                      |                                    |                                     |                                    |                                        |                                          |
| <b>Family</b>                         | 155                                  | 5.8<br>(5.0 – 7.0)                 | 309                                 | 5.8<br>(5.0 – 7.0)                 | 5.8<br>(5.0 – 7.0)                     | 0.896                                    |
| <b>Personal</b>                       | 154                                  | 6.8<br>(5.0 – 8.0)                 | 311                                 | 7.1<br>(6.0 – 8.0)                 | 6.7<br>(6.0 – 8.0)                     | <b>0.007<sup>g</sup></b>                 |
| <b>NEET<sup>b</sup>:</b>              | 138                                  |                                    | 266                                 |                                    |                                        | 0.210                                    |
| Yes                                   | 45                                   | 32.6                               | 105                                 | 39.5                               | 150 (37.1)                             |                                          |
| No                                    | 93                                   | 67.4                               | 161                                 | 60.5                               | 254 (62.9)                             |                                          |
| <b>Receive any benefits</b>           | 154                                  |                                    | 311                                 |                                    |                                        | 0.776                                    |
| Yes                                   | 48                                   | 31.0                               | 101                                 | 32.4                               | 149 (31.9)                             |                                          |
| No                                    | 106                                  | 68.4                               | 210                                 | 67.3                               | 316 (67.7)                             |                                          |
| Not answered                          | 1                                    | 0.6                                | 1                                   | 0.3                                | 2 (0.4)                                |                                          |
| <b>Ever been homeless</b>             |                                      |                                    |                                     |                                    |                                        | <b>0.023<sup>g</sup></b>                 |
| Yes                                   | 19                                   | 12.3                               | 65                                  | 20.8                               | 84 (18.0)                              |                                          |
| No                                    | 136                                  | 87.9                               | 247                                 | 79.2                               | 383 (82.0)                             |                                          |
| <b>Deprivation (IMDS)<sup>c</sup></b> | 154                                  | 40.4<br>(24.8 – 54.3)              | 308                                 | 38.0<br>(24.8 – 51.4)              | 38.8<br>(24.8 – 51.7)                  | 0.175                                    |
| <b>Health utility</b>                 |                                      |                                    |                                     |                                    |                                        | 0.374                                    |
| Perfect health                        | 104                                  | 67.1                               | 195                                 | 62.5                               | 299 (64.0)                             |                                          |
| Less than perfect health              | 51                                   | 32.9                               | 115                                 | 36.9                               | 166 (35.5)                             |                                          |
| Not answered                          | 0                                    | 0.0                                | 2                                   | 0.6                                | 2 (0.4)                                |                                          |
| <b>Self-rated health</b>              |                                      |                                    |                                     |                                    |                                        | 0.227                                    |
| Excellent                             | 24                                   | 15.5                               | 58                                  | 18.6                               | 82 (17.6)                              |                                          |
| Good                                  | 113                                  | 72.9                               | 200                                 | 64.1                               | 313 (67.0)                             |                                          |
| Fair                                  | 17                                   | 11.0                               | 48                                  | 15.4                               | 65 (13.9)                              |                                          |
| Poor                                  | 1                                    | 0.6                                | 6                                   | 1.9                                | 7 (1.5)                                |                                          |
| <b>Limiting chronic illness:</b>      |                                      |                                    |                                     |                                    |                                        | 0.144                                    |
| Yes                                   | 24                                   | 15.5                               | 66                                  | 21.2                               | 90 (19.3)                              |                                          |
| No                                    | 131                                  | 84.5                               | 246                                 | 78.8                               | 377 (80.7)                             |                                          |

c:\programdata\activepdf\dc\_ent\tmp\6c500b\27691771\_file000002\_639940258.docx

|                                                                             |     |                       |     |                       |                       |                    |
|-----------------------------------------------------------------------------|-----|-----------------------|-----|-----------------------|-----------------------|--------------------|
| <b>Self-efficacy<sup>d</sup></b>                                            | 151 | 29.7<br>(27.0 – 32.5) | 308 | 29.9<br>(28.0 – 32.0) | 29.8<br>(27.0 – 32.0) | 0.604              |
| <b>Adaptive functioning:<br/>Difficulty in at least<br/>one basic skill</b> |     |                       |     |                       |                       | 0.674              |
| Yes                                                                         | 36  | 23.2                  | 78  | 25.0                  | 114 (24.4)            |                    |
| No                                                                          | 119 | 76.8                  | 234 | 75.0                  | 353 (75.6)            |                    |
| <b>3 or fewer key life skills</b>                                           |     |                       |     |                       |                       | 0.822              |
| Yes                                                                         | 39  | 25.2                  | 81  | 26.0                  | 120 (25.7)            |                    |
| No                                                                          | 116 | 74.8                  | 229 | 73.4                  | 345 (73.9)            |                    |
| Missing                                                                     | 0   | 0.0                   | 2   | 0.6                   | 2 (0.4)               |                    |
| <b>At least one burden</b>                                                  |     |                       |     |                       |                       | 0.080              |
| Yes                                                                         | 55  | 35.5                  | 87  | 27.9                  | 142 (30.4)            |                    |
| No                                                                          | 98  | 63.2                  | 224 | 71.8                  | 322 (69.0)            |                    |
| Missing                                                                     | 2   | 1.3                   | 1   | 0.3                   | 3 (0.6)               |                    |
| <b>Alcohol / drug use<sup>f</sup></b>                                       | 147 | 1.2<br>(0.0 – 2.0)    | 296 | 1.3<br>(0.0 – 2.0)    | 1.3<br>(0.0 – 2.0)    | 0.212              |
| <b>Antisocial behaviour</b>                                                 | 154 | 2.0<br>(1.0 – 3.0)    | 310 | 2.3<br>(1.0 – 4.0)    | 2.2<br>(1.0 – 3.0)    | 0.088              |
| <b>Social support</b>                                                       | 155 | 85.7<br>(77.0 – 98.7) | 310 | 85.8<br>(79.0 – 98.7) | 85.8<br>(77.6 – 98.7) | 0.491              |
| <b>Relationship quality</b>                                                 | 130 | 28.5<br>(26.0 – 32.0) | 255 | 28.2<br>(26.0 – 32.0) | 28.3<br>(26.0 – 32.0) | 0.433              |
| <b>Family resources</b>                                                     | 150 | 13.5<br>(11.0 – 16.0) | 296 | 13.5<br>(11.0 – 16.0) | 13.5<br>(11.0 – 16.0) | 0.884              |
| <b>Psychological distress /<br/>Mental health</b>                           | 155 | 20.3<br>(15.0 – 25.0) | 311 | 21.8<br>(17.0 – 26.0) | 21.3<br>(16.0 – 26.0) | 0.025              |
| <b>Trial site</b>                                                           |     |                       |     |                       |                       | 0.003 <sup>h</sup> |
| 1                                                                           | 1   | 0.6                   | 10  | 3.2                   | 11 (2.4)              |                    |
| 2                                                                           | 5   | 3.2                   | 8   | 2.6                   | 13 (2.8)              |                    |
| 3                                                                           | 14  | 9.0                   | 15  | 4.8                   | 29 (6.2)              |                    |
| 4                                                                           | 2   | 1.3                   | 7   | 2.2                   | 9 (1.9)               |                    |
| 5                                                                           | 8   | 5.2                   | 10  | 3.2                   | 18 (3.9)              |                    |
| 6                                                                           | 6   | 3.9                   | 7   | 2.2                   | 13 (2.8)              |                    |
| 7                                                                           | 7   | 4.5                   | 7   | 2.2                   | 14 (3.0)              |                    |
| 8                                                                           | 12  | 7.7                   | 19  | 6.1                   | 31 (6.6)              |                    |
| 9                                                                           | 13  | 8.4                   | 26  | 8.3                   | 39 (8.4)              |                    |
| 10                                                                          | 5   | 3.2                   | 17  | 5.4                   | 22 (4.7)              |                    |
| 11                                                                          | 7   | 4.5                   | 30  | 9.6                   | 37 (7.9)              |                    |
| 12                                                                          | 17  | 11.0                  | 16  | 5.1                   | 33 (7.1)              |                    |
| 13                                                                          | 7   | 4.5                   | 35  | 11.2                  | 42 (9.0)              |                    |
| 14                                                                          | 5   | 3.2                   | 3   | 1.0                   | 8 (1.7)               |                    |
| 15                                                                          | 11  | 7.1                   | 26  | 8.3                   | 37 (7.9)              |                    |
| 16                                                                          | 19  | 12.3                  | 19  | 6.1                   | 38 (8.1)              |                    |
| 17                                                                          | 8   | 5.2                   | 30  | 9.6                   | 38 (8.1)              |                    |
| 18                                                                          | 8   | 5.2                   | 27  | 8.7                   | 35 (7.5)              |                    |

*a* Interquartile range; *b* Definition of NEET: Not in education employment or training (applicable only to those whose academic age is >16 at baseline interview); *c* Higher IMD score indicated more deprivation; *d* Higher score indicates higher level of self-efficacy; *e* Higher score indicates better management of day-to-day lives and routines (for each of the three subscales); *f* CRAFFT screening test<sup>12</sup> for substance related risks and problems in adolescents; *g* italics indicate variable included in logistic regression, **bold** indicates variable remained significantly associated with number of visits in logistic model; *h* not modelled in regression analysis due to high number of levels

#### Other services

c:\programdata\activepdf\dc\_ent\tmp\6c500b\27691771\_file000002\_639940258.docx

Participants accessed a wide range of services encompassing housing support, financial support, education, healthcare, childcare and social care (tables 4 to 5). A small proportion of respondents reported accessing support for housing outside of their friends and family, mostly from the local authority (table 4). The small difference in reported rates between study arms would appear to have been in part attributable to additional assistance from the FNP family nurse. Most participants reported being in receipt of additional publicly funded financial support. For most participants this included income support, housing benefit and council tax reductions with similar rates between study arms reported. Smaller proportions of participants reported other forms of financial assistance related to employment, education or personal health (eg, Jobseekers allowance). The largest difference in reported rates between study arms was for those who received regular financial support from parents: 8.9% (FNP), 15.4% (UC).

**Table 4 Proportion of participants reporting housing and financial support by follow-up point (months)**

|                                        | 6            |             | 12           |             | 18           |             | 24           |             |
|----------------------------------------|--------------|-------------|--------------|-------------|--------------|-------------|--------------|-------------|
|                                        | FNP<br>n=511 | UC<br>n=470 | FNP<br>n=514 | UC<br>n=483 | FNP<br>n=501 | UC<br>n=466 | FNP<br>n=595 | UC<br>n=559 |
| <b>i) Source of housing support</b>    |              |             |              |             |              |             |              |             |
| Anyone outside of friends or family    | 18.0         | 14.9        | 12.1         | 9.9         | 9.2          | 8.4         | 12.1         | 9.7         |
| Local authority housing department     | 7.0          | 6.6         | 5.1          | 5.6         | 4.6          | 4.7         | 6.2          | 5.9         |
| Family Nurse                           | 4.1          | -           | 3.1          | -           | 2.2          | -           | 5.4          | -           |
| <b>ii) Source of financial support</b> |              |             |              |             |              |             |              |             |
| State benefits or payments             | -            | -           | -            | -           | -            | -           | 86.9         | 88.4        |
| Income support                         | -            | -           | -            | -           | -            | -           | 62.0         | 63.3        |
| Jobseekers allowance                   | -            | -           | -            | -           | -            | -           | 8.6          | 8.9         |
| Housing benefit                        | -            | -           | -            | -           | -            | -           | 64.2         | 68.5        |
| Council tax reduction                  | -            | -           | -            | -           | -            | -           | 62.9         | 63.3        |
| Disability living allowance            | -            | -           | -            | -           | -            | -           | 2.5          | 5.4         |
| Incapacity benefit                     | -            | -           | -            | -           | -            | -           | 0.7          | 1.6         |
| Child Support Agency <sup>1</sup>      | -            | -           | -            | -           | -            | -           | 12.8         | 11.6        |
| Regular support from parents           | -            | -           | -            | -           | -            | -           | 8.9          | 15.4        |
| Education grants                       | -            | -           | -            | -           | -            | -           | 5.5          | 5.9         |

<sup>1</sup> Directly or via partner

Most women seeking contraception obtained it from their general practice, and to a lesser extent from a family planning clinic. There were some small differences between study arms by time point (eg at 18 months 46.1% of women in the UC arm accessed contraception from their GP, while 38.5% in the FNP did) but overall use of this service was similar. The proportion of women accessing any education gradually increased across the duration of the trial. By 24 months about a fifth of women were in school, college or training (FNP: 22.5%, UC: 18.1%). This was mostly in mainstream education, although there were a small number of women in both trial arms accessing support in more specialised units (eg, learning support unit). A similar pattern of increasing support for childcare was observed over time with approximately a quarter of women reporting some form of childcare support used at 24 months. Support was received from a variety of sources and there appeared to be a similar pattern of usage between study arms.

c:\programdata\activepdf\dc\_ent\tml\6c500b\27691771\_file000002\_639940258.docx

**Table 5 Proportion of participants reporting access to education, childcare and other support services by follow-up point (months)**

|                                         | <b>6</b>            |                    | <b>12</b>           |                    | <b>18</b>           |                    | <b>24</b>           |                    |
|-----------------------------------------|---------------------|--------------------|---------------------|--------------------|---------------------|--------------------|---------------------|--------------------|
|                                         | <i>FNP</i><br>n=511 | <i>UC</i><br>n=470 | <i>FNP</i><br>n=514 | <i>UC</i><br>n=483 | <i>FNP</i><br>n=501 | <i>UC</i><br>n=466 | <i>FNP</i><br>n=595 | <i>UC</i><br>n=559 |
| <b>i) Education attended</b>            |                     |                    |                     |                    |                     |                    |                     |                    |
| <i>Any school, college or training</i>  | 14.5                | 16.4               | 20.4                | 19.0               | 22.4                | 20.6               | 22.5                | 18.1               |
| <i>Mainstream school or college</i>     | 11.3                | 13.7               | 15.0                | 15.6               | 19.5                | 18.7               | 16.6                | 12.7               |
| <i>Learning support unit</i>            | 0.6                 | 0.2                | 0.6                 | 0.6                | 0.2                 | 0                  | 0.7                 | 0.7                |
| <i>Pupil referral unit</i>              | 0                   | 0.2                | 0                   | 0                  | 0                   | 0                  | 0                   | 0.2                |
| <i>Teenage mums support unit</i>        | 0.8                 | 1.7                | 0.6                 | 0.6                | 0.4                 | 0.6                | 0.7                 | 1.5                |
| <b>ii) Childcare accessed</b>           |                     |                    |                     |                    |                     |                    |                     |                    |
| <i>Any childcare</i>                    | 7.0                 | 7.0                | 16.1                | 13.3               | 25.5                | 21.5               | 26.9                | 24.3               |
| <i>Crèche at school or college</i>      | 4.1                 | 4.5                | 8.8                 | 6.6                | 4.8                 | 3.6                | 12.1                | 12.3               |
| <i>Day nursery at children's centre</i> | 0.8                 | 0.6                | 0                   | 0                  | 3.6                 | 2.4                | 5.5                 | 4.3                |
| <i>Child-minder</i>                     | 1.8                 | 1.1                | 2.1                 | 1.2                | 3.2                 | 2.4                | 3.2                 | 3.0                |
| <i>Other forms of childcare</i>         | 0.8                 | 0.6                | 2.1                 | 2.9                | 8.0                 | 6.9                | 6.7                 | 6.1                |
| <b>iii) Other support services</b>      |                     |                    |                     |                    |                     |                    |                     |                    |
| <i>Connexions</i>                       | 31.1                | 26.8               | 23.5                | 23.2               | 16.8                | 17.0               | *                   | *                  |
| <i>School nurse</i>                     | 1.4                 | 1.5                | 0.8                 | 0.4                | 0                   | 0.9                | 0.5                 | 0.9                |
| <i>Young People's Centre</i>            | 4.9                 | 7.0                | 2.7                 | 3.9                | 1.8                 | 1.9                | 1.8                 | 1.6                |
| <i>Family Information Centre</i>        | 2.0                 | 2.3                | 1.2                 | 1.5                | 2.2                 | 3.0                | 1.3                 | 1.4                |
| <i>Children's Centre</i>                | 36.6                | 36.6               | 25.8                | 35.6               | 28.3                | 30.0               | 34.6                | 26.7               |
| <i>Child development centre</i>         | 0.6                 | 0.6                | 0.4                 | 1.7                | 0.8                 | 1.5                | 1.0                 | 2.5                |
| <i>Crèche/ day nursery</i>              | 10.8                | 10.8               | 15.4                | 14.7               | 8.4                 | 6.0                | 17.6                | 16.6               |
| <i>Toddler group</i>                    | 7.8                 | 7.9                | 12.5                | 11.0               | 16.2                | 15.2               | 19.2                | 21.5               |
| <i>Leaving care service</i>             | 1.4                 | 0.4                | 1.8                 | 1.0                | 1.4                 | 0.6                | 2.0                 | 0.9                |
| <i>Fostering service</i>                | 0.6                 | 0.2                | 0.4                 | 0.4                | 0                   | 0.6                | 0.3                 | 0.4                |
| <i>Youth offending team</i>             | 0.8                 | 0.9                | 0.2                 | 0.2                | 0.4                 | 0                  | 0.3                 | 0                  |
| <i>Social worker</i>                    | 10.6                | 10.0               | 7.4                 | 7.5                | 8.2                 | 6.2                | 13.1                | 9.7                |
| <i>Alcohol / drug support</i>           | 0.6                 | 0                  | 0.2                 | 0.2                | 0                   | 0.4                | 0.3                 | 0.5                |

1 Some respondents indicated they were in school, college or training but provided no further information

\* Not collected as service reconfigured

Various other services were accessed, the most frequent being Connexions and Children's Centres. The former was used with decreasing frequency over time (consistent with the aging profile of the sample), while the latter showed a more variable pattern of access across each time point and on occasions quite different rates of access between trial arms. At six months one in ten mothers in both trial arms reported contact with a social worker, a rate that varied over time to 24 months at which point there was only a small difference between groups (FNP: 13.1%, UC: 9.7%).

## DISCUSSION

To understand the service context within which FNP was trialled we mapped the range of services available. The multiplicity of services often within the same area and their varying labels often concealed similarities and differences between services. We established the usage of key services by trial participants across service domains. We particularly focused on those most directly relevant to the intervention (eg, health visiting) although included many other services. With mostly only small differences in usage between trial arms perhaps what is most important is the wide range of services being accessed. Although the previous US

c:\programdata\activepdf\dc\_ent\tmp\6c500b\27691771\_file000002\_639940258.docx

1  
2  
3 trials have not further reported on broader services, the contexts were likely to be very  
4 different from the English trial setting.

5 FNP aims to impact upon a range of maternal and child outcomes. Therefore our selection of  
6 relevant services was necessarily broad and informed by the intervention's theory of change,  
7 which includes promoting access to services. However, previously reported attempts to map  
8 services have been challenging even when restricted to a single organisation.<sup>13</sup> To cope with  
9 such complexity researchers have sought to distinguish between specialist and generic  
10 services, including through a multi-staged approach as used here.<sup>14</sup> It has been consistently  
11 reported that information provision is time consuming in such exercises, as we also found.<sup>15</sup>  
12 Individual informants may be unfamiliar with all relevant services even within their  
13 professional area, hence the coordinated approach to data gathering from multiple informants  
14 we used. Feedback from FNP staff in our process evaluation focus groups highlighted a  
15 similar challenge when acquiring knowledge about local services, essential for then linking up  
16 clients to relevant support.<sup>11</sup> Some core services such as mainstream education were not  
17 always reported and illustrates the need to clearly define the scope of the information request  
18 to informants, especially the boundaries within which they are being asked to respond.

19 In effectiveness trials existing services could respond by augmenting support to those in the  
20 control arm. Such performance bias limits generalizability especially if that support was very  
21 different from usual care and approaching the level of support provided by the new  
22 intervention. Our findings do not indicate this in general and specifically for community  
23 midwifery and health visiting, the two most closely aligned universal services. Community  
24 midwives visits were equivalent between trials arms and the difference in contacts with health  
25 visitors was attributable to clinic rather than home visits and therefore unlikely to be  
26 substantial. There was some indication that women in the usual care arm with some  
27 additional objective need identified at baseline, such as experience of homelessness,  
28 received more home visits. However, providing enhanced care to clients most in need would  
29 be usual practice. Evidence that this occurred in a trial context is not in itself a threat to  
30 external validity. The large caseloads managed by health visitors emphasises the lack of  
31 opportunity to provide significant additional support to mothers allocated to usual care.<sup>11</sup>

32 Our trial found fewer short-term benefits than previous US trials despite FNP being well  
33 implemented.<sup>1-3, 8</sup> The population studied differed from that in the US, for example by being  
34 fundamentally identified by maternal age and this may have contributed to some differences  
35 in impact detected. However, the service context would have been very different. Some  
36 additional standardised support in the form of developmental screening and referral, and free  
37 travel to appointments was provided to women in the control arm of each US trial. However,  
38 the broad and layered range of services identified in our study would not have been available.  
39 The extreme community disadvantage present in the first US trial from which much longer-  
40 term evidence has accrued (at the inception of the first US trial Elmira was ranked bottom of  
41 all 380 metropolitan statistical areas in terms of economic conditions) additionally compounds  
42 this. That is not to say that women in our trial were free of disadvantage or had services that  
43 fully met their needs. However, substantial differences across trial settings are likely to have  
44 varied the potential for beneficial impact.

44 Service provision may change over time and any single mapping exercise will miss this real-  
45 world dynamic. Quantification of service use should be open to the capture of newer services.  
46 Additionally, with superficial service names not always reflecting well actual support provided  
47 it is important to look beyond service labels. Finally, high-level service descriptions do not  
48 always represent the often complex multi-professional interactions which necessarily facilitate  
49 service delivery. This emphasises the need for adequate qualitative description and  
50 interpretation of services.

51 Loss to follow-up at assessment points may introduce bias into the descriptive analysis. We  
52 have previously reported on group differences in attrition apparent at 24 months follow-up  
53 however such, differences were small.<sup>11</sup> A second consideration is the level of detail available  
54 for health visitor and midwifery contacts (eg, visit duration). It is reasonable to assume that  
55 given capacity and opportunity, women in the UC arm visited by health professionals would  
56 have received greater attention than other clients perceived as less in need. This is consistent  
57  
58  
59



c:\programdata\activepdf\dc\_ent\tmp\6c500b\27691771\_file000002\_639940258.docx

1  
2  
3 with their professional role and reflective of contemporary best usual practice.<sup>16</sup> It is also  
4 possible that women in the FNP arm received relatively less attention than non-FNP clients if  
5 they were seen to be receiving enhanced support. Nevertheless, the total number of home  
6 and clinic visits received in both trial arms was small compared to that provided by FNP  
7 nurses. Future process evaluations should model the impact upon existing services of such  
8 service innovation to both avoid unintended consequences (eg, service displacement) and  
9 maximise synergy across services.

10 The effectiveness of a public health intervention can only be adequately evaluated with a  
11 sound understanding of the service context within which it operates and which may also form  
12 the trial comparator.<sup>17</sup> Describing and quantifying the nature of usually available services can  
13 be challenging especially when services arise from a number of sectors, may evolve over the  
14 period of study and vary across study sites. In mapping the pattern of support potentially  
15 available to participants in our trial we have gained a critical understanding of the context  
16 within which and against which FNP should be considered. While challenging, we remain  
17 convinced of the need to develop this area of research when evaluating public health  
18 interventions. Indeed, in their feedback survey respondents reported the usefulness of the  
19 exercise in gaining greater insights about local services, some sharing the generated service  
20 summaries with their teams. Finally, we quantified maternal reported service usage to provide  
21 key insights into how our main trial results should be interpreted.  
22  
23  
24  
25  
26  
27  
28  
29  
30  
31  
32  
33  
34  
35  
36  
37  
38  
39  
40  
41  
42  
43  
44  
45  
46  
47  
48  
49  
50  
51  
52  
53  
54  
55  
56  
57  
58  
59  
60

c:\programdata\activepdf\dc\_ent\tmp\6c500b\27691771\_file000002\_639940258.docx

## ACKNOWLEDGEMENTS

The authors gratefully acknowledge the contribution of Dr Lesley Wye, University of Bristol and Dr Marie-Jet Bekkers who contributed to some of the planning and implementation of the reported study, and to all other members of the broader Building Blocks research team who supported overall trial delivery. We are grateful to each local site informant who contributed to data collection in either of the two rounds of service mapping and especially to the three local coordinators who initially piloted our mapping tool. We are also grateful to all women who participated in the trial and for their time in completing outcome and resource assessments.

## COMPETING INTERESTS

Prior to working on the Building Blocks trial, Sue Channon facilitated two workshops on Motivational Interviewing for supervisors within the FNP. The authors declare no competing interests.

## CONTRIBUTORS

MR, KH and JS conceived the study and all authors contributed to the development of its protocol. MR wrote the first draft with further contributions from all authors. RP, JS and GM were involved in data collection and management. RP was responsible for developing the survey of local stakeholders and GM was responsible for managing data collected from trial participants used in the analysis. RP, RCJ, GM and MR were involved in analysis and developing summary tables for publication. SC and JS were responsible for the management of this package of work within the trial overall. MR was responsible for obtaining study funding. All authors contributed to data interpretation, reviewed successive drafts and approved the final version of the manuscript.

## ETHICS

The trial was approved by the Wales NHS Research Ethics Committee (09/MRE09/08) and received governance approval from all participating NHS sites. All women provided written informed consent.

## PARTICIPANT CONSENT

All participants provided written informed consent to take part in the study.

## FUNDING

The South East Wales Trials Unit (SEWTU), Centre for Trials Research, Cardiff University is funded by the Welsh Government through Health and Care Research Wales and the authors gratefully acknowledge SEWTU's contribution to study implementation. This is an independent report commissioned, sponsored and funded by the Policy Research Programme in the Department of Health (reference no. 006/0060). The views expressed are not necessarily those of the Department of Health.

## DATA SHARING

The datasets generated and analysed during the current study are not publicly available as contributors / participants may be identifiable and are also subject to sponsor approval, but may be available from the corresponding author on reasonable request.

c:\programdata\activepdf\dc\_ent\tmp\6c500b\27691771\_file000002\_639940258.docx

## References

1. Olds DL, Henderson CR, Jr., Chamberlin R, Tatelbaum R. Preventing child abuse and neglect: a randomized trial of nurse home visitation. *Pediatrics* 1986; 78 (1): 65-78.
2. Kitzman H, Olds DL, Henderson CR, Jr., et al. Effect of Prenatal and Infancy Home Visitation by Nurses On Pregnancy Outcomes, Childhood Injuries, and Repeated Childbearing: A Randomised Controlled Trial. *JAMA* 1997; 278 (8): 644-52.
3. Olds DL, Robinson J, O'Brien R, et al. Home Visiting by Paraprofessionals and by Nurses: A Randomized, Controlled Trial. *Pediatrics* 2002; 110 (3): 486-96.
4. Barnes J, Ball M, Meadows P et al. Nurse-Family Partnership Programme: First Year Pilot Sites Implementation in England - Pregnancy and the Post-partum Period. London: Birkbeck, University of London; 2008.
5. Barnes J, Ball M, Meadows P et al. Nurse-Family Partnership Programme: Second Year Pilot Sites Implementation in England - The Infancy Period. London: Birkbeck, University of London; 2009.
6. Barnes J, Ball M, Meadows P, et al. The Family-Nurse Partnership Programme in England: Wave 1 implementation in toddlerhood & a comparison between Waves 1 and 2a of implementation in pregnancy and infancy. London: Institute for the Study of Children, Families and Social Issues: Birkbeck, University of London, 2011.
7. Owen-Jones E, Bekkers M-J, Butler CC, et al. The effectiveness and cost-effectiveness of the Family Nurse Partnership home visiting programme for first time teenage mothers in England: a protocol for the Building Blocks randomised controlled trial. *BMC Pediatrics* 2013; 13 (1): 114.
8. Robling M, Bekkers M-J, Bell K, et al. Effectiveness of a nurse-led intensive home-visitaton programme for first-time teenage mothers (Building Blocks): a pragmatic randomised controlled trial. *Lancet* 2015; published online Oct 14. [http://dx.doi.org/10.1016/S0140-6736\(15\)00392-X](http://dx.doi.org/10.1016/S0140-6736(15)00392-X).
9. Hsieh HF, Shannon SE. Three approaches to qualitative content analysis. *Qualitative Health Research* 2005 15: 1277-88
10. NVivo qualitative data analysis Software; QSR International Pty Ltd. Version 8, 2008
11. Robling MR Bekkers M-J, Bell K et al. Evaluating the Family Nurse Partnership Programme in England: A Randomised Controlled Trial. Final report to The Department of Health. 2015. (<http://bit.ly/buildingblockstrial>).
12. Knight JR, Sherritt L, Shrier LA et al Validity of the CRAFFT substance abuse screening test among adolescent clinic patients. *Arch Pediatr Adolesc Med* 2002, 156(6):607–614.[CRAFFT].
13. Hotopf M, Rayner L, Valsraj K. Improving 'Whole Person Care' A report on mental health related services offered by King's Health Partners' acute trusts: King's Health Partners, 2012.
14. Challis D, Darton R, Donnelly M et al. Mapping and evaluation of care management arrangements for older people and those with menatal health problems in an integrated health and social services system: a comparative study: The Personal Social Services Research Unit, 1999.
15. Health Do. Children's services mapping. A complete picture of children's service provision: Department of Health. Department for Children Schools and Families, 2010.
16. NICE. Pregnancy and complex social factors: A model for service provision for pregnant women with complex social factors. London, 2010.
17. Smelt AFH, van der Weele GM, Blom JW et al. How usual is usual care in pragmatic intervention studies in primary care? An overview of recent trials. *British Journal of General Practice* 2010 e305.

# BMJ Open

**What is usual care for teenagers expecting their first child in England?: a process evaluation using key informant mapping and participant survey as part of the Building Blocks randomised controlled trial of specialist home visiting.**

|                                 |                                                                                                                                                                                                                                                                                                                                                                                                                                                                                                                           |
|---------------------------------|---------------------------------------------------------------------------------------------------------------------------------------------------------------------------------------------------------------------------------------------------------------------------------------------------------------------------------------------------------------------------------------------------------------------------------------------------------------------------------------------------------------------------|
| Journal:                        | <i>BMJ Open</i>                                                                                                                                                                                                                                                                                                                                                                                                                                                                                                           |
| Manuscript ID                   | bmjopen-2017-020152.R1                                                                                                                                                                                                                                                                                                                                                                                                                                                                                                    |
| Article Type:                   | Research                                                                                                                                                                                                                                                                                                                                                                                                                                                                                                                  |
| Date Submitted by the Author:   | 28-Dec-2017                                                                                                                                                                                                                                                                                                                                                                                                                                                                                                               |
| Complete List of Authors:       | Robling, Michael; Cardiff University, Centre for Trials Research<br>Cannings John, Rebeca; Cardiff University, Centre for Trials Research<br>Channon, Sue; Cardiff University, Centre for Trials Research<br>Hood, Kerenza; Cardiff University, South East Wales Trials Unit, Centre for Trials Research<br>Moody, Gwenllian; Cardiff University, Centre for Trials Research<br>Poole, Ria; Cardiff University, Medicine<br>Sanders, Julia; School of Healthcare Sciences, Room 12:15, Eastgate House, 35-43 Newport Road |
| <b>Primary Subject Heading</b>: | Public health                                                                                                                                                                                                                                                                                                                                                                                                                                                                                                             |
| Secondary Subject Heading:      | Public health, Qualitative research, Research methods                                                                                                                                                                                                                                                                                                                                                                                                                                                                     |
| Keywords:                       | Organisation of health services < HEALTH SERVICES ADMINISTRATION & MANAGEMENT, PAEDIATRICS, Child protection < PAEDIATRICS, PUBLIC HEALTH                                                                                                                                                                                                                                                                                                                                                                                 |
|                                 |                                                                                                                                                                                                                                                                                                                                                                                                                                                                                                                           |

SCHOLARONE™  
Manuscripts

c:\programdata\activepdf\dc\_ent\tmp\456441\28623087\_file000006\_653285914.docx

**Title: What is usual care for teenagers expecting their first child in England?: a process evaluation using key informant mapping and participant survey as part of the Building Blocks randomised controlled trial of specialist home visiting.**

**Corresponding author:**

**Prof Mike Robling**  
**Centre for Trials Research, Cardiff University**  
**Neuadd Meirionnydd, Heath Park, Cardiff. CF14 4YS**  
[robtingmr@cardiff.ac.uk](mailto:robtingmr@cardiff.ac.uk)  
**+44 (0)29 2068 7177**

**Authors:**

- Mike Robling, Centre for Trials Research, Cardiff University, Cardiff, Wales, UK
- Rebecca Cannings-John, Centre for Trials Research, Cardiff University, Cardiff, Wales, UK
- Sue Channon, Centre for Trials Research, Cardiff University, Cardiff, Wales, UK
- Kerry Hood, Centre for Trials Research, Cardiff University, Cardiff, Wales, UK
- Gwen Moody, Centre for Trials Research, Cardiff University, Cardiff, Wales, UK
- Ria Poole, School of Medicine, Cardiff University, Cardiff, Wales, UK
- Julia Sanders, School of Healthcare Sciences, Cardiff University, Cardiff, Wales, UK

**Key words:** Public health, child health, nursing, randomised trial

**Current abstract word count:** 299

**Current manuscript word count:** 4080

**Reference count:** 19

c:\programdata\activepdf\dc\_ent\tmp\456441\28623087\_file000006\_653285914.docx

**Title: What is usual care for teenagers expecting their first child in England?: a process evaluation using key informant mapping and participant survey as part of the Building Blocks randomised controlled trial of specialist home visiting.**

## **Abstract**

### **Objectives**

We compared the US-derived Family Nurse Partnership (FNP) home visiting programme when added to usually provided health and social care for first-time teenage mothers, to usual care alone. We aimed to: establish the nature of usual care, measure service usage and assess performance bias in core usual care services.

### **Design**

Within trial process evaluation. Local professionals completed a survey mapping local health and social care services in seven domains. This focused on services available to young women, especially those relevant to pregnant teenagers. Descriptive data were assessed thematically to establish the range of services. Quantitative data collection with FNP supervisors enumerated service provision by site. Services identified were included in main participant trial follow-up interviews at four time-points to quantify usage. Usage was described descriptively by domain. We explored predictors of health visitor visits.

### **Setting**

Eighteen partnerships of local authority and healthcare organisations in England.

### **Outcomes**

Descriptive framework of services. Rates of service usage reported by trial participants.

### **Results**

161 separate services were identified, with multiple service models in each domain, broadly categorised as universal or specialist (eg for teenage mothers). FNP supervisors identified 30-63 universal services per site and 22-67 specialist services. Use of core maternity care services were similar across trial arms and with only small differences in use of health visiting services. Participants accessed a wide range of services. Women who had ever been homeless, who had a higher subjectively defined social status, and poorer mental health received more visits from a health visitor.

### **Conclusions**

The large number of services available to teenage mothers in England may limit the incremental benefit achievable through enhanced home visiting. There was little evidence of compensatory practice, such as additional care for women in the usual care arm. Measuring usual care when trialling complex interventions is challenging and essential.

c:\programdata\activepdf\dc\_ent\tmp\456441\28623087\_file000006\_653285914.docx

### Strengths and limitations of this study

- The identification of sometimes multiple local stakeholders and drawing upon their existing knowledge using a semi-structured self-completion tool about a range of relevant services enabled us to develop a rich picture of what may be usually available care for teenagers expecting their first child.
- Undertaking the initial mapping exercise enabled us to develop a more informed service use inventory with greater content validity than may otherwise have been possible.
- The combination of professionally-led key informant mapping and detailed service use recording as part of trial follow-up data collection therefore provides a more nuanced understanding of usual care. This greater understanding of the trial's control condition enhances interpretation of trial results.
- However, changes over time, and within and between site differences in how services are configured, perceived and understood means that a summary statement about all locally relevant services will need to be intermittently revisited.
- Although we have an understanding about how services were similarly or differently accessed by intervention and control participants in the trial, the intensity and duration of individual sessions for non-FNP services is not known. However, comprehensively attempting to collect such detailed data from trial participants would probably not be feasible in practice
- Some bias due to participant attrition in follow-up interviews is likely despite relatively high trial retention rates, although other analyses show only minimal differences between those recruited and followed-up.

c:\programdata\activepdf\dc\_ent\tmp\456441\28623087\_file000006\_653285914.docx

## INTRODUCTION

Individual, social, and economic circumstances faced by teenage mothers can challenge a successful start for their children. Responding in 2006, the Government in England adopted a preventative US-derived programme of nurse-led intensive home-visiting, the Family Nurse Partnership (FNP). Specially trained family nurses support first-time mothers through up to 64 home visits starting in early pregnancy and until the child reaches their second birthday. In three US trials, the programme has been evaluated with differing socio-demographic populations, justifying initial testing in a UK context.<sup>1-3</sup>

Following an implementation evaluation, 18 English Primary Care Trust (PCT) sites participated in the Building Blocks trial (ISRCTN23019866) of the programme's effectiveness recruiting 1645 teenagers expecting their first child.<sup>4-8</sup> The sites were dispersed across the UK, and covered two rural and 16 city areas. Women were recruited before 25 weeks gestation, lived within geographical areas served by the FNP team and spoke at least conversational English. Assessing over 60 short-term outcomes (to 24 months post-partum) in domain areas of pregnancy and birth, child development, and maternal life-course, four primary outcomes of programme and policy interest were prioritised.

We compared FNP when added to usually provided health and social care to usual care alone. In the absence of comprehensive public healthcare in the US, across all three previous evaluations the counterfactual was reported as obstetric office-based antenatal care, paediatric developmental screening, referral at specified time points and free transport to office-based consultations. Elevating the control condition to just more than simply no care, the augmented control condition was not further described. Given the provision of free universal health services in the UK, the ethical trial comparator was an active control condition. However, it was expected that what would be available to young families may be complex and vary by site and over time.

We aimed to map and quantify usually provided care and so clarify the trial's control condition, the service context into which FNP was introduced and allow exploration of any performance bias affecting validity of the trial comparison.

## METHODS

We first elicited and mapped usual services available locally at each of the 18 trial sites. Each site comprised collaborative partnerships between National Health Service (NHS) organisations and local authorities. All sites had applied to the Department of Health to be a provider of FNP including by demonstrating local clinical need and commitment to sustain local programme delivery. Sites included urban and rural settings across England and encompassed each of the ten strategic health authorities in England. Second, we enumerated services accessed by participants in both trial arms.

### *Eliciting and mapping services*

A mapping tool was drafted using an Excel worksheet following discussion within the research team. This sought to identify services available for pregnant teenagers and young families across seven initial domains: midwifery, health visiting (specialist public health nurses), education, housing, social care and other services (e.g., Children's Centres) and funding schemes specifically for young parents). This would therefore include services that were also universally available, such as maternity care. The tool required the site contacts to provide the title of service and a brief description. It was piloted with local coordinators at three sites who described service characteristics (e.g., provider, eligibility criteria) and were debriefed by telephone interview to assess feasibility. An amended version, which incorporated completion instructions (Appendix 1), a worked example and study information, was circulated via email in the first instance to each site principal investigator (e.g., the local FNP project lead and in all cases not a member of the research team) who then cascaded to local contacts across health and social care (usually managers or heads of services). By engaging with heads of services and other local professional staff (e.g. housing support workers) further detail about specific services or domains were provided, including



c:\programdata\activepdf\dc\_ent\tmp\456441\28623087\_file000006\_653285914.docx

documentation on local services where available. Respondents were asked to provide details of “routinely provided services within their local authority which may be provided to young women, but may be especially relevant to pregnant teenagers”. In parallel with obtaining information describing available services, national policies and guidelines were sourced informing on the minimum expected standard of universally available services such as maternity care and state welfare (e.g. childcare vouchers). Mapping data were collected over six months.

Within sites and across respondents we reviewed submitted returns to identify missing or incomplete data (i.e., to identify the presence or absence of expected services / service descriptions) and followed up if necessary with local site contacts. This process was informed by documentary data provided by sites or available online. Data provided by sites were entered into NVivo 8<sup>9</sup> and analysed thematically by researchers who also involved service experts to review the developing coding framework before coming to a consensus on the final range of services available. A second round of online data collection addressing the same domains aimed to consolidate and confirm information already provided and to reduce variation that may be solely attributable to reporting bias. This comprised a structured form listing services by domain and tick boxes for respondents to indicate presence or absence. Free text (‘Other’) services allowed for unlisted services to be reported. Local FNP supervisors completed this form.

#### *Enumerating service by trial participants*

Trial participants were teenagers (aged 19 years or under at last menstrual period) expecting their first child, living in the catchment area for local FNP provision recruited before 25 weeks gestation, able to provide informed consent and competent to converse in English.<sup>7</sup> Access to supportive services within each core domain was measured as part of the trial’s follow-up outcome evaluation telephone interview schedule at late pregnancy, and 6, 12 and 18 months postpartum.<sup>7</sup> These included use of childcare, primary (eg, midwifery, GP, health visiting) and secondary (eg, A&E, Out-patient, In-patients) healthcare attendances, sexual health (contraceptive services), formal education, Connexions (a government funded support and advisory service for young people aged 13-19 years old), support with housing, and a range of additional support services. At 24 months additional questions asked about financial support.

Some data informed the separately reported cost-effectiveness analysis.<sup>10</sup> In the current analysis we describe the pattern of core service usage (eg, health visiting, midwifery, housing) for those in both trial arms, and the level of support provided additionally via FNP (for FNP clients, the Healthy Child Programme was delivered by FNs rather than by health visitors). Data on the latter were provided via the FNP national unit’s Information System. Use of services was analysed descriptively and is reported by service domain showing counts and proportions for those in the two trial arms separately. Multivariable logistic regression was used to explore whether certain maternal characteristics collected as part of the trial’s baseline assessment were associated with level of observed HV support. We created a binary variable of number of HV visits which distinguished between a standard / expected level of care (less than 4 visits) and enhanced care (4 or more visits). Univariable association were screened using a  $p < 0.10$  cut off and retained in the final multivariable model. Estimates are shown as odds ratios (ORs) and 95% confidence intervals (CIs).

## **RESULTS**

### *Eliciting and mapping services*

round one was conducted in a six week period from August 2009. all sites responded, with at least six individual informants contributing data per site. A varying level of detail was provided about identified services. In general spreadsheets circulated to multiple stakeholders were more comprehensively completed.

Similar services within any one domain were subsequently grouped together even if labelled differently by informants. This resulted in 161 identified services, some with similar aims. An example was that of education provided to pregnant teenagers aged under 16 years old with

c:\programdata\activepdf\dc\_ent\tmp\456441\28623087\_file000006\_653285914.docx

1  
2  
3 eight different named services. In round two, conducted in July 2011, the 161 services were  
4 listed, categorised into 12 service domains (the original domains plus 'other services' sub-  
5 divided on the basis of stage 1 responses into childcare, complex needs, Connexions, drug  
6 and alcohol, mental health, third sector, and sexual health).

7  
8 The total number of services identified per site ranged from 52 to 113. These included  
9 between 26 and 53 universal services and between 22 and 86 locally available / specialist  
10 services. Services were provided by public, private and third sector organisations and  
11 collectively delivered direct care, support or guidance. Examples of Specialist and Locally  
12 available services are shown in table 1.  
13  
14  
15  
16  
17  
18  
19  
20  
21  
22  
23  
24  
25  
26  
27  
28  
29  
30  
31  
32  
33  
34  
35  
36  
37  
38  
39  
40  
41  
42  
43  
44  
45  
46  
47  
48  
49  
50  
51  
52  
53  
54  
55  
56  
57  
58  
59  
60

c:\programdata\activepdf\dc\_ent\tmp\456441\28623087\_file000006\_653285914.docx

**Table 1: Service mapping – examples of services<sup>1</sup> described by study sites<sup>3</sup>**

| Domain                                 | Specialist services - specifically for pregnant teenagers or younger parents                                                                                                                                          | Locally Available services - with a specialist nature and eligibility criteria, but not necessarily designed for teenage parents                                                                                                                                                   |
|----------------------------------------|-----------------------------------------------------------------------------------------------------------------------------------------------------------------------------------------------------------------------|------------------------------------------------------------------------------------------------------------------------------------------------------------------------------------------------------------------------------------------------------------------------------------|
| <b>Education</b>                       | <ul style="list-style-type: none"> <li>• Schools / colleges with provision for teenage mums</li> <li>• Teenage pregnancy support services</li> <li>• Accredited courses with free child care for under 25s</li> </ul> | <ul style="list-style-type: none"> <li>• Home learning programmes</li> </ul>                                                                                                                                                                                                       |
| <b>Housing</b>                         | <ul style="list-style-type: none"> <li>• Teenage parents' scheme: training in independent living skills</li> <li>• Supported housing: young vulnerable women or teenage parents</li> </ul>                            | <ul style="list-style-type: none"> <li>• Outreach support service aimed at young homeless people under 18</li> <li>• Mother and Baby Hostel</li> </ul>                                                                                                                             |
| <b>Health Visiting</b>                 |                                                                                                                                                                                                                       | <ul style="list-style-type: none"> <li>• Antenatal contact at home or in midwife-led antenatal clinics</li> <li>• Minor ailments sessions run by health visitors</li> </ul>                                                                                                        |
| <b>Midwifery</b>                       | <ul style="list-style-type: none"> <li>• Teenage pregnancy midwives</li> <li>• Antenatal clinics run by midwives in schools</li> </ul>                                                                                | <ul style="list-style-type: none"> <li>• Midwives based in Children's Centres</li> </ul>                                                                                                                                                                                           |
| <b>Social Services</b>                 | <ul style="list-style-type: none"> <li>• Teenage pregnancy support service</li> </ul>                                                                                                                                 | <ul style="list-style-type: none"> <li>• Targeted youth support for vulnerable young people</li> <li>• Specialist therapeutic unit for young victims of sexual abuse</li> <li>• Family resource service; practical support to access universal services</li> </ul>                 |
| <b>Connexions Services<sup>2</sup></b> | <ul style="list-style-type: none"> <li>• Teenage Pregnancy Advisors help young mums-to-be and young families</li> </ul>                                                                                               | <ul style="list-style-type: none"> <li>• Provide information and guidance to Looked After young people</li> <li>• Provide support and guidance for young people leaving care</li> <li>• Provide practical help and advice for young mums who want to go back to college</li> </ul> |
| <b>Drugs, Alcohol and Smoking</b>      |                                                                                                                                                                                                                       | <ul style="list-style-type: none"> <li>• Specialist drugs and alcohol services working with police</li> <li>• Community-based young people's drugs and alcohol service</li> <li>• Smoking in Pregnancy cessation service</li> </ul>                                                |
| <b>Sexual Health</b>                   | <ul style="list-style-type: none"> <li>• Lifestyle services working with teenage parents to prevent second pregnancy</li> </ul>                                                                                       | <ul style="list-style-type: none"> <li>• Family planning services for under 25-yr-olds in community settings</li> <li>• Sexual health services for teenagers</li> <li>• Condom distribution scheme in community settings</li> </ul>                                                |

c:\programdata\activepdf\dc\_ent\tmp\456441\28623087\_file000006\_653285914.docx

|                                          |                                                                                                                                                     |                                                                                                                                                                                                                                                                                                                                                                         |
|------------------------------------------|-----------------------------------------------------------------------------------------------------------------------------------------------------|-------------------------------------------------------------------------------------------------------------------------------------------------------------------------------------------------------------------------------------------------------------------------------------------------------------------------------------------------------------------------|
| <b>Mental Health services</b>            |                                                                                                                                                     | <ul style="list-style-type: none"> <li>• Specialist Children's and Adolescent Mental Health Services for eating disorders</li> <li>• Mother-and-baby units in hospitals and prisons</li> <li>• Specialist psychiatric unit for postnatal mental illness</li> </ul>                                                                                                      |
| <b>Complex Needs Childcare provision</b> | <ul style="list-style-type: none"> <li>• Support and advocacy for (pregnant) teenagers with complex needs</li> </ul>                                | <ul style="list-style-type: none"> <li>• Child development centre for pre-school children with complex needs</li> <li>• Sure Start language therapy team</li> <li>• Vulnerable baby service: targeted safeguarding prevention</li> <li>• Private, voluntary, independent childcare providers</li> <li>• Internet database on county-wide childcare provision</li> </ul> |
| <b>Local / third sector projects</b>     | <ul style="list-style-type: none"> <li>• Charity funded teen parents projects</li> <li>• Peer support sessions for teenage fathers-to-be</li> </ul> | <ul style="list-style-type: none"> <li>• Barnardo's Priory Family Centre</li> <li>• Charity funded young parents projects</li> <li>• Home Start: trained volunteers visit mums for approx. 15 months</li> </ul>                                                                                                                                                         |

1 Set information provided by local informants for each reported service included: Name of service, Narrative description, Limits on availability (eg, upper limit on number of women offered service, Location (eg, base), Level of service provision per client (eg, frequency, duration, quantity), Illustrative current caseload, Delivery setting, Client eligibility criteria, Service provider (eg, local authority), Assessment of local service variations compared to other locations

2 A government funded advisory and support service for young people aged 13-19 years old, now discontinued

3 Data collection timing: Round 1 - Data collection was requested over a six-week period from August 2009 to coincide with early stages of trial recruitment; Round 2: The survey link was sent to local FNP supervisors for completion in July 2011.

4 A tiered system of local government throughout England has responsibility for services including education, housing and Social Services. For example, across England there are 152 separate Local Education Authorities (LEAs), each of which has responsibility for providing child education in their area. The responsibility for the provision of Social Services and housing will rest with either one of the 152 principal authorities or, particularly in large urban areas, devolved to one of 326 lower tier authorities. Until April 2013 (ie, within the timeframe for the Building Blocks trial), 10 strategic health authorities existed across England, with health care provided through local NHS Primary Care and Hospital Trusts. Subsequent to the trial period and from 1st October 2015 the responsibility for commissioning public health services for children aged 0-5 transferred from NHS England to local authorities

5 Locally available services would exclude universally available services, which may be provided across all sites (whether provided specifically for women of a certain age or all women). Hence, routine midwifery care (for example) would not be reported here.

c:\programdata\activepdf\dc\_ent\tmp\456441\28623087\_file000006\_653285914.docx

1  
2  
3 Not all universal services were reported from all sites although these would have been  
4 available (eg, universal education provision to age 16 years). In the domains of mental health,  
5 addiction and complex needs provision a small number of sites reported no additional locally  
6 available or specialist services. No sites reported specialist health visiting services for  
7 teenagers. Fourteen sites reported the employment of specialist teenage pregnancy  
8 midwives. Details from local informants describe the type and range of services available  
9 across the range of providers and sector domains. Services were numerous, complex and in  
10 some cases with fluid boundaries facilitating multi-disciplinary interaction to support users.  
11 Individual services although provided with similar intent could vary by site, while  
12 administrative boundaries between services were shown to be fluid.

### 13 *Service usage during the trial*

14 Initially 823 women were allocated to receive FNP and 822 women to Usual Care (UC) and  
15 following mandatory or elective withdrawal (including of consent), 808 and 810 women  
16 respectively completed baseline assessment.<sup>8</sup> The median ages (25<sup>th</sup> to 75<sup>th</sup> centile) of  
17 women were 17.9 (17.0 to 18.8) in the FNP arm and 17.9 (16.9 to 18.8) in the UC arm.  
18 Interviews were completed with 501 women (FNP) and 466 women (UC) at 18 months. At 24  
19 months follow-up the number of interviews completed were 595 (FNP) and 559 (UC). The first  
20 woman was recruited to the trial on June 16<sup>th</sup> 2009 and the date of the last follow-up (24  
21 month) assessment was April 24<sup>th</sup> 2013.

### 22 *Community health visiting, midwifery and FNP*

23 Core publicly funded services for mothers are maternity care and health visiting. The mean  
24 number of all home visits from health visitors was similar in both study arms (UC: 5.01 (SD  
25 5.51); FNP: 4.70 (SD 7.81)). Contact with health visitors in clinic was quite different with more  
26 reported by mothers in the UC arm (mean 6.31, SD 7.07) than in the FNP arm (0.70, SD  
27 2.92). The number of contacts within each reporting period up to 18 months reflects a similar  
28 pattern (table 2). The mean number of community midwifery contacts during pregnancy for  
29 the 422 UC women responding in late pregnancy was 10.69 (SD: 5.34) and for the 459 in the  
30 FNP arm was 10.68 (SD: 5.25). Women allocated to FNP received an average of 9.71, 18.63  
31 and 13.22 valid FN visits per programme phase (Pregnancy, Infancy, Toddlerhood) with  
32 average visit duration of 79.14 minutes. There was a programme attrition rate by phase of  
33 3.6%, 10.1% and 7.9% respectively (cumulative rate of 21.1%).  
34  
35  
36  
37  
38  
39  
40  
41  
42  
43  
44  
45  
46  
47  
48  
49  
50  
51  
52  
53  
54  
55  
56  
57  
58  
59  
60

c:\programdata\activepdf\dc\_ent\tmp\456441\28623087\_file000006\_653285914.docx

**Table 2 Participant reported access to health services (health visitor and contraception) by follow-up (month)**

|                                              | 6            |             | 12           |             | 18           |             | Combined<br>(up to 18<br>months) |             |
|----------------------------------------------|--------------|-------------|--------------|-------------|--------------|-------------|----------------------------------|-------------|
|                                              | FNP<br>n=511 | UC<br>n=470 | FNP<br>n=514 | UC<br>n=483 | FNP<br>n=501 | UC<br>n=466 | FNP<br>n=501                     | UC<br>n=466 |
| <b>Health visitor<br/>contacts Mean (SD)</b> |              |             |              |             |              |             |                                  |             |
| Home                                         | 3.07 (6.08)  | 3.35 (3.58) | 1.24 (3.67)  | 1.16 (2.63) | 0.50 (2.50)  | 0.93 (2.58) | 4.70 (7.81)                      | 5.01 (5.51) |
| Clinic                                       | 0.51 (2.12)  | 3.72 (5.04) | 0.20 (1.37)  | 1.66 (2.76) | 0.06 (0.45)  | 1.01 (2.51) | 0.70 (2.92)                      | 6.31 (7.07) |
| <b>Contraceptive<br/>services %</b>          |              |             |              |             |              |             |                                  |             |
| GP surgery                                   | 42.3         | 38.3        | 41.2         | 44.1        | 38.5         | 46.1        |                                  |             |
| Family planning clinic                       | 26.2         | 19.8        | 19.6         | 18.6        | 22.6         | 18.7        |                                  |             |
| Children's centre                            | 1.4          | 0.6         | 1.0          | 0.8         | 1.0          | 0.4         |                                  |             |
| Sexual health clinic                         | 6.1          | 4.5         | 4.7          | 4.3         | 7.2          | 4.5         |                                  |             |

We explored variation in core service usage to determine whether level of observed support ( $\leq 3$  HV home visits /  $>3+$  HV home visits in the first 6 months postpartum) was directed to participants distinguishable on the basis of baseline characteristics (Table 3). Women who had ever been homeless, had a higher subjectively defined social status, and poorer mental health were associated with 4 or more visits, while visit frequency also varied by trial site (but was not subsequently entered into the final model) (table 3). Homelessness (OR=1.80, 95% CI=1.02 to 3.17) and subjective social status (OR=1.13, 95% CI=1.01 to 1.27) were the only two individual characteristics that remained independently associated with visit numbers.

c:\programdata\activepdf\dc\_ent\tmp\456441\28623087\_file000006\_653285914.docx

**Table 3 Baseline predictors of number of home visits from health visitor by six months postpartum for women in usual care arm**

|                                       | <b>3 or fewer visits<br/>(N=155)</b> |                                    | <b>4 or more visits<br/>(N=312)</b> |                                    | <b>Overall<br/>N=467</b>               | <b>Univariate<br/>assoc.<sup>g</sup></b> |
|---------------------------------------|--------------------------------------|------------------------------------|-------------------------------------|------------------------------------|----------------------------------------|------------------------------------------|
|                                       | N                                    | Median (IQR <sup>a</sup> )<br>or % | N                                   | Median (IQR <sup>a</sup> )<br>or % | Median (IQR <sup>a</sup> )<br>or N (%) |                                          |
| <b>Age in years</b>                   |                                      | 17.9<br>(17.1 – 18.7)              |                                     | 17.8<br>(16.9 – 18.9)              | 17.8<br>(16.9 – 18.8)                  | 0.721                                    |
| <b>Ethnic background</b>              |                                      |                                    |                                     |                                    |                                        | 0.070                                    |
| White                                 | 130                                  | 83.9                               | 276                                 | 88.5                               | 406 (86.9)                             |                                          |
| Mixed                                 | 5                                    | 3.2                                | 18                                  | 5.9                                | 23 (4.9)                               |                                          |
| Asian                                 | 3                                    | 1.9                                | 4                                   | 1.3                                | 7 (1.5)                                |                                          |
| Black                                 | 15                                   | 9.7                                | 13                                  | 4.2                                | 28 (6.0)                               |                                          |
| Other                                 | 2                                    | 1.3                                | 1                                   | 0.3                                | 3 (0.6)                                |                                          |
| <b>Relationship status</b>            |                                      |                                    |                                     |                                    |                                        | 0.433                                    |
| Married                               | 4                                    | 2.6                                | 3                                   | 1.0                                | 7 (1.5)                                |                                          |
| Separated                             | 13                                   | 8.4                                | 34                                  | 10.9                               | 47 (10.1)                              |                                          |
| Closely inv. / boyfriend              | 120                                  | 77.4                               | 244                                 | 78.2                               | 364 (77.9)                             |                                          |
| Just friends                          | 18                                   | 11.6                               | 31                                  | 9.9                                | 49 (10.5)                              |                                          |
| <b>Live with father of baby</b>       |                                      |                                    |                                     |                                    |                                        | 0.512                                    |
| Yes                                   | 42                                   | 27.1                               | 71                                  | 22.8                               | 113 (24.2)                             |                                          |
| No                                    | 108                                  | 69.7                               | 212                                 | 67.9                               | 320 (68.5)                             |                                          |
| Not answered                          | 5                                    | 3.2                                | 29                                  | 9.3                                | 34 (7.3)                               |                                          |
| <b>Subjective social status:</b>      |                                      |                                    |                                     |                                    |                                        |                                          |
| <b>Family</b>                         | 155                                  | 5.8<br>(5.0 – 7.0)                 | 309                                 | 5.8<br>(5.0 – 7.0)                 | 5.8<br>(5.0 – 7.0)                     | 0.896                                    |
| <b>Personal</b>                       | 154                                  | 6.8<br>(5.0 – 8.0)                 | 311                                 | 7.1<br>(6.0 – 8.0)                 | 6.7<br>(6.0 – 8.0)                     | <b>0.007<sup>g</sup></b>                 |
| <b>NEET<sup>b</sup>:</b>              |                                      |                                    |                                     |                                    |                                        | 0.210                                    |
| Yes                                   | 45                                   | 32.6                               | 105                                 | 39.5                               | 150 (37.1)                             |                                          |
| No                                    | 93                                   | 67.4                               | 161                                 | 60.5                               | 254 (62.9)                             |                                          |
| <b>Receive any benefits</b>           |                                      |                                    |                                     |                                    |                                        | 0.776                                    |
| Yes                                   | 48                                   | 31.0                               | 101                                 | 32.4                               | 149 (31.9)                             |                                          |
| No                                    | 106                                  | 68.4                               | 210                                 | 67.3                               | 316 (67.7)                             |                                          |
| Not answered                          | 1                                    | 0.6                                | 1                                   | 0.3                                | 2 (0.4)                                |                                          |
| <b>Ever been homeless</b>             |                                      |                                    |                                     |                                    |                                        | <b>0.023<sup>g</sup></b>                 |
| Yes                                   | 19                                   | 12.3                               | 65                                  | 20.8                               | 84 (18.0)                              |                                          |
| No                                    | 136                                  | 87.9                               | 247                                 | 79.2                               | 383 (82.0)                             |                                          |
| <b>Deprivation (IMDS)<sup>c</sup></b> |                                      |                                    |                                     |                                    |                                        | 0.175                                    |
|                                       | 154                                  | 40.4<br>(24.8 – 54.3)              | 308                                 | 38.0<br>(24.8 – 51.4)              | 38.8<br>(24.8 – 51.7)                  |                                          |
| <b>Health utility</b>                 |                                      |                                    |                                     |                                    |                                        | 0.374                                    |
| Perfect health                        | 104                                  | 67.1                               | 195                                 | 62.5                               | 299 (64.0)                             |                                          |
| Less than perfect health              | 51                                   | 32.9                               | 115                                 | 36.9                               | 166 (35.5)                             |                                          |
| Not answered                          | 0                                    | 0.0                                | 2                                   | 0.6                                | 2 (0.4)                                |                                          |
| <b>Self-rated health</b>              |                                      |                                    |                                     |                                    |                                        | 0.227                                    |
| Excellent                             | 24                                   | 15.5                               | 58                                  | 18.6                               | 82 (17.6)                              |                                          |
| Good                                  | 113                                  | 72.9                               | 200                                 | 64.1                               | 313 (67.0)                             |                                          |
| Fair                                  | 17                                   | 11.0                               | 48                                  | 15.4                               | 65 (13.9)                              |                                          |
| Poor                                  | 1                                    | 0.6                                | 6                                   | 1.9                                | 7 (1.5)                                |                                          |
| <b>Limiting chronic illness:</b>      |                                      |                                    |                                     |                                    |                                        | 0.144                                    |
| Yes                                   | 24                                   | 15.5                               | 66                                  | 21.2                               | 90 (19.3)                              |                                          |
| No                                    | 131                                  | 84.5                               | 246                                 | 78.8                               | 377 (80.7)                             |                                          |

c:\programdata\activepdf\dc\_ent\tmp\456441\28623087\_file000006\_653285914.docx

|                                                                             |     |                       |     |                       |                       |                    |
|-----------------------------------------------------------------------------|-----|-----------------------|-----|-----------------------|-----------------------|--------------------|
| <b>Self-efficacy<sup>d</sup></b>                                            | 151 | 29.7<br>(27.0 – 32.5) | 308 | 29.9<br>(28.0 – 32.0) | 29.8<br>(27.0 – 32.0) | 0.604              |
| <b>Adaptive functioning:<br/>Difficulty in at least<br/>one basic skill</b> |     |                       |     |                       |                       | 0.674              |
| Yes                                                                         | 36  | 23.2                  | 78  | 25.0                  | 114 (24.4)            |                    |
| No                                                                          | 119 | 76.8                  | 234 | 75.0                  | 353 (75.6)            |                    |
| <b>3 or fewer key life skills</b>                                           |     |                       |     |                       |                       | 0.822              |
| Yes                                                                         | 39  | 25.2                  | 81  | 26.0                  | 120 (25.7)            |                    |
| No                                                                          | 116 | 74.8                  | 229 | 73.4                  | 345 (73.9)            |                    |
| Missing                                                                     | 0   | 0.0                   | 2   | 0.6                   | 2 (0.4)               |                    |
| <b>At least one burden</b>                                                  |     |                       |     |                       |                       | 0.080              |
| Yes                                                                         | 55  | 35.5                  | 87  | 27.9                  | 142 (30.4)            |                    |
| No                                                                          | 98  | 63.2                  | 224 | 71.8                  | 322 (69.0)            |                    |
| Missing                                                                     | 2   | 1.3                   | 1   | 0.3                   | 3 (0.6)               |                    |
| <b>Alcohol / drug use<sup>f</sup></b>                                       | 147 | 1.2<br>(0.0 – 2.0)    | 296 | 1.3<br>(0.0 – 2.0)    | 1.3<br>(0.0 – 2.0)    | 0.212              |
| <b>Antisocial behaviour</b>                                                 | 154 | 2.0<br>(1.0 – 3.0)    | 310 | 2.3<br>(1.0 – 4.0)    | 2.2<br>(1.0 – 3.0)    | 0.088              |
| <b>Social support</b>                                                       | 155 | 85.7<br>(77.0 – 98.7) | 310 | 85.8<br>(79.0 – 98.7) | 85.8<br>(77.6 – 98.7) | 0.491              |
| <b>Relationship quality</b>                                                 | 130 | 28.5<br>(26.0 – 32.0) | 255 | 28.2<br>(26.0 – 32.0) | 28.3<br>(26.0 – 32.0) | 0.433              |
| <b>Family resources</b>                                                     | 150 | 13.5<br>(11.0 – 16.0) | 296 | 13.5<br>(11.0 – 16.0) | 13.5<br>(11.0 – 16.0) | 0.884              |
| <b>Psychological distress /<br/>Mental health</b>                           | 155 | 20.3<br>(15.0 – 25.0) | 311 | 21.8<br>(17.0 – 26.0) | 21.3<br>(16.0 – 26.0) | 0.025              |
| <b>Trial site</b>                                                           |     |                       |     |                       |                       | 0.003 <sup>h</sup> |
| 1                                                                           | 1   | 0.6                   | 10  | 3.2                   | 11 (2.4)              |                    |
| 2                                                                           | 5   | 3.2                   | 8   | 2.6                   | 13 (2.8)              |                    |
| 3                                                                           | 14  | 9.0                   | 15  | 4.8                   | 29 (6.2)              |                    |
| 4                                                                           | 2   | 1.3                   | 7   | 2.2                   | 9 (1.9)               |                    |
| 5                                                                           | 8   | 5.2                   | 10  | 3.2                   | 18 (3.9)              |                    |
| 6                                                                           | 6   | 3.9                   | 7   | 2.2                   | 13 (2.8)              |                    |
| 7                                                                           | 7   | 4.5                   | 7   | 2.2                   | 14 (3.0)              |                    |
| 8                                                                           | 12  | 7.7                   | 19  | 6.1                   | 31 (6.6)              |                    |
| 9                                                                           | 13  | 8.4                   | 26  | 8.3                   | 39 (8.4)              |                    |
| 10                                                                          | 5   | 3.2                   | 17  | 5.4                   | 22 (4.7)              |                    |
| 11                                                                          | 7   | 4.5                   | 30  | 9.6                   | 37 (7.9)              |                    |
| 12                                                                          | 17  | 11.0                  | 16  | 5.1                   | 33 (7.1)              |                    |
| 13                                                                          | 7   | 4.5                   | 35  | 11.2                  | 42 (9.0)              |                    |
| 14                                                                          | 5   | 3.2                   | 3   | 1.0                   | 8 (1.7)               |                    |
| 15                                                                          | 11  | 7.1                   | 26  | 8.3                   | 37 (7.9)              |                    |
| 16                                                                          | 19  | 12.3                  | 19  | 6.1                   | 38 (8.1)              |                    |
| 17                                                                          | 8   | 5.2                   | 30  | 9.6                   | 38 (8.1)              |                    |
| 18                                                                          | 8   | 5.2                   | 27  | 8.7                   | 35 (7.5)              |                    |

*a* Interquartile range; *b* Definition of NEET: Not in education employment or training (applicable only to those whose academic age is >16 at baseline interview); *c* Higher IMD score indicated more deprivation; *d* Higher score indicates higher level of self-efficacy; *e* Higher score indicates better management of day-to-day lives and routines (for each of the three subscales); *f* CRAFFT screening test<sup>11</sup> for substance related risks and problems in adolescents; *g* italics indicate variable included in logistic regression, **bold** indicates variable remained significantly associated with number of visits in logistic model; *h* not modelled in regression analysis due to high number of levels; *i* The three original scale items comprised having to care for someone with long-term illness or alcohol / drug problem, feeling that they had in/sufficient privacy, living with people who respondents wished were not around

#### Other services



c:\programdata\activepdf\dc\_ent\tmp\456441\28623087\_file000006\_653285914.docx

Participants accessed a wide range of services encompassing housing support, financial support, education, healthcare, childcare and social care (tables 4 to 5). A small proportion of respondents reported accessing support for housing outside of their friends and family, mostly from the local authority (table 4). The small difference in reported rates between study arms would appear to have been in part attributable to additional assistance from the FNP family nurse. Most participants reported being in receipt of additional publicly funded financial support. For most participants this included income support, housing benefit and council tax reductions with similar rates between study arms reported. Smaller proportions of participants reported other forms of financial assistance related to employment, education or personal health (eg, Jobseekers allowance). The largest difference in reported rates between study arms was for those who received regular financial support from parents: 8.9% (FNP), 15.4% (UC).

**Table 4 Participants (%) reporting housing and financial support by follow-up point (months)**

|                                        | 6            |             | 12           |             | 18           |             | 24           |             |
|----------------------------------------|--------------|-------------|--------------|-------------|--------------|-------------|--------------|-------------|
|                                        | FNP<br>n=511 | UC<br>n=470 | FNP<br>n=514 | UC<br>n=483 | FNP<br>n=501 | UC<br>n=466 | FNP<br>n=595 | UC<br>n=559 |
| <b>i) Source of housing support</b>    |              |             |              |             |              |             |              |             |
| Anyone outside of friends or family    | 18.0         | 14.9        | 12.1         | 9.9         | 9.2          | 8.4         | 12.1         | 9.7         |
| Local authority housing department     | 7.0          | 6.6         | 5.1          | 5.6         | 4.6          | 4.7         | 6.2          | 5.9         |
| Family Nurse                           | 4.1          | -           | 3.1          | -           | 2.2          | -           | 5.4          | -           |
| <b>ii) Source of financial support</b> |              |             |              |             |              |             |              |             |
| State benefits or payments             | -            | -           | -            | -           | -            | -           | 86.9         | 88.4        |
| Income support                         | -            | -           | -            | -           | -            | -           | 62.0         | 63.3        |
| Jobseekers allowance                   | -            | -           | -            | -           | -            | -           | 8.6          | 8.9         |
| Housing benefit                        | -            | -           | -            | -           | -            | -           | 64.2         | 68.5        |
| Council tax reduction                  | -            | -           | -            | -           | -            | -           | 62.9         | 63.3        |
| Disability living allowance            | -            | -           | -            | -           | -            | -           | 2.5          | 5.4         |
| Incapacity benefit                     | -            | -           | -            | -           | -            | -           | 0.7          | 1.6         |
| Child Support Agency <sup>1</sup>      | -            | -           | -            | -           | -            | -           | 12.8         | 11.6        |
| Regular support from parents           | -            | -           | -            | -           | -            | -           | 8.9          | 15.4        |
| Education grants                       | -            | -           | -            | -           | -            | -           | 5.5          | 5.9         |

<sup>1</sup> Directly or via partner

Most women seeking contraception obtained it from their general practice, and to a lesser extent from a family planning clinic. There were some small differences between study arms by time point (eg at 18 months 46.1% of women in the UC arm accessed contraception from their GP, while 38.5% in the FNP did) but overall use of this service was similar. The proportion of women accessing any education gradually increased across the duration of the trial. By 24 months about a fifth of women were in school, college or training (FNP: 22.5%, UC: 18.1%). This was mostly in mainstream education, although there were a small number of women in both trial arms accessing support in more specialised units (eg, learning support unit). A similar pattern of increasing support for childcare was observed over time with approximately a quarter of women reporting some form of childcare support used at 24 months. Support was received from a variety of sources and there appeared to be a similar pattern of usage between study arms.

c:\programdata\activepdf\dc\_ent\tmp\456441\28623087\_file000006\_653285914.docx

**Table 5 Participants (%) reporting access to education, childcare and other support services by follow-up point (months)**

|                                         | <b>6</b>            |                    | <b>12</b>           |                    | <b>18</b>           |                    | <b>24</b>           |                    |
|-----------------------------------------|---------------------|--------------------|---------------------|--------------------|---------------------|--------------------|---------------------|--------------------|
|                                         | <i>FNP</i><br>n=511 | <i>UC</i><br>n=470 | <i>FNP</i><br>n=514 | <i>UC</i><br>n=483 | <i>FNP</i><br>n=501 | <i>UC</i><br>n=466 | <i>FNP</i><br>n=595 | <i>UC</i><br>n=559 |
| <b>i) Education attended</b>            |                     |                    |                     |                    |                     |                    |                     |                    |
| <i>Any school, college or training</i>  | 14.5                | 16.4               | 20.4                | 19.0               | 22.4                | 20.6               | 22.5                | 18.1               |
| <i>Mainstream school or college</i>     | 11.3                | 13.7               | 15.0                | 15.6               | 19.5                | 18.7               | 16.6                | 12.7               |
| <i>Learning support unit</i>            | 0.6                 | 0.2                | 0.6                 | 0.6                | 0.2                 | 0                  | 0.7                 | 0.7                |
| <i>Pupil referral unit</i>              | 0                   | 0.2                | 0                   | 0                  | 0                   | 0                  | 0                   | 0.2                |
| <i>Teenage mums support unit</i>        | 0.8                 | 1.7                | 0.6                 | 0.6                | 0.4                 | 0.6                | 0.7                 | 1.5                |
| <b>ii) Childcare accessed</b>           |                     |                    |                     |                    |                     |                    |                     |                    |
| <i>Any childcare</i>                    | 7.0                 | 7.0                | 16.1                | 13.3               | 25.5                | 21.5               | 26.9                | 24.3               |
| <i>Crèche at school or college</i>      | 4.1                 | 4.5                | 8.8                 | 6.6                | 4.8                 | 3.6                | 12.1                | 12.3               |
| <i>Day nursery at children's centre</i> | 0.8                 | 0.6                | 0                   | 0                  | 3.6                 | 2.4                | 5.5                 | 4.3                |
| <i>Child-minder</i>                     | 1.8                 | 1.1                | 2.1                 | 1.2                | 3.2                 | 2.4                | 3.2                 | 3.0                |
| <i>Other forms of childcare</i>         | 0.8                 | 0.6                | 2.1                 | 2.9                | 8.0                 | 6.9                | 6.7                 | 6.1                |
| <b>iii) Other support services</b>      |                     |                    |                     |                    |                     |                    |                     |                    |
| <i>Connexions</i>                       | 31.1                | 26.8               | 23.5                | 23.2               | 16.8                | 17.0               | *                   | *                  |
| <i>School nurse</i>                     | 1.4                 | 1.5                | 0.8                 | 0.4                | 0                   | 0.9                | 0.5                 | 0.9                |
| <i>Young People's Centre</i>            | 4.9                 | 7.0                | 2.7                 | 3.9                | 1.8                 | 1.9                | 1.8                 | 1.6                |
| <i>Family Information Centre</i>        | 2.0                 | 2.3                | 1.2                 | 1.5                | 2.2                 | 3.0                | 1.3                 | 1.4                |
| <i>Children's Centre</i>                | 36.6                | 36.6               | 25.8                | 35.6               | 28.3                | 30.0               | 34.6                | 26.7               |
| <i>Child development centre</i>         | 0.6                 | 0.6                | 0.4                 | 1.7                | 0.8                 | 1.5                | 1.0                 | 2.5                |
| <i>Crèche/ day nursery</i>              | 10.8                | 10.8               | 15.4                | 14.7               | 8.4                 | 6.0                | 17.6                | 16.6               |
| <i>Toddler group</i>                    | 7.8                 | 7.9                | 12.5                | 11.0               | 16.2                | 15.2               | 19.2                | 21.5               |
| <i>Leaving care service</i>             | 1.4                 | 0.4                | 1.8                 | 1.0                | 1.4                 | 0.6                | 2.0                 | 0.9                |
| <i>Fostering service</i>                | 0.6                 | 0.2                | 0.4                 | 0.4                | 0                   | 0.6                | 0.3                 | 0.4                |
| <i>Youth offending team</i>             | 0.8                 | 0.9                | 0.2                 | 0.2                | 0.4                 | 0                  | 0.3                 | 0                  |
| <i>Social worker</i>                    | 10.6                | 10.0               | 7.4                 | 7.5                | 8.2                 | 6.2                | 13.1                | 9.7                |
| <i>Alcohol / drug support</i>           | 0.6                 | 0                  | 0.2                 | 0.2                | 0                   | 0.4                | 0.3                 | 0.5                |

<sup>1</sup> Some respondents indicated they were in school, college or training but provided no further information

\* Not collected as service reconfigured

Various other services were accessed, the most frequent being Connexions and Children's Centres. The former was used with decreasing frequency over time (consistent with the aging profile of the sample), while the latter showed a more variable pattern of access across each time point and on occasions quite different rates of access between trial arms. At six months one in ten mothers in both trial arms reported contact with a social worker, a rate that varied over time to 24 months at which point there was only a small difference between groups (FNP: 13.1%, UC: 9.7%).

## DISCUSSION

To understand the service context within which FNP was trialled we mapped the range of services available. The multiplicity of services often within the same area and their varying labels often concealed similarities and differences between services. We established the usage of key services by trial participants across service domains. We particularly focused on those most directly relevant to the intervention (eg, health visiting) although included many other services. With mostly only small differences in usage between trial arms perhaps what is most important is the wide range of services being accessed. Although the previous US

c:\programdata\activepdf\dc\_ent\tmp\456441\28623087\_file000006\_653285914.docx

1  
2  
3 trials have not further reported on broader services, the contexts were likely to be very  
4 different from the English trial setting.

5 FNP aims to impact upon a range of maternal and child outcomes. Therefore our selection of  
6 relevant services was necessarily broad and informed by the intervention's theory of change,  
7 which includes promoting access to services. However, previously reported attempts to map  
8 services have been challenging even when restricted to a single organisation.<sup>12</sup> To cope with  
9 such complexity researchers have sought to distinguish between specialist and generic  
10 services, including through a multi-staged approach as used here.<sup>13</sup> It has been consistently  
11 reported that information provision is time consuming for professionals (or other key  
12 informants) in such exercises, as we also found.<sup>14</sup> Individual informants may be unfamiliar  
13 with all relevant services even within their professional area, hence the coordinated approach  
14 to data gathering from multiple informants we used. Feedback from FNP staff in our process  
15 evaluation focus groups highlighted a similar challenge when acquiring knowledge about local  
16 services, essential for then linking up clients to relevant support.<sup>10</sup> Some core services such  
17 as mainstream education were not always reported and illustrates the need to clearly define  
18 the scope of the information request to informants, especially the boundaries within which  
19 they are being asked to respond. On this last point we would also clarify that many services  
20 however resourced and whether universal in availability or not, may impact upon the health  
21 and wellbeing of mother and child. We have measured for trial participants services actually  
22 used. The extent to which mothers can practically access currently unused or underused  
23 services effectively represents a key potential for future benefit if addressable barriers to  
24 accessed can be removed.

25 Our experience from this study will encourage us to further develop an approach to better  
26 understanding usual care in complex service settings. Our approach spanned an elicitation  
27 phase whereby we started by plotting a map of services and then a consolidation phase  
28 where we largely sought to confirm the contours on the map. Accordingly we took an  
29 exploratory approach for the former and a largely confirmatory approach for the latter. How  
30 either is actually done may depend on study setting and resource. The spreadsheets worked  
31 well in that they were portable and could be transferred easily to informants for completion  
32 once we had piloted them. However, an in-person semi-structured approach could have  
33 worked as well, but may have been more resource intensive. The complexity and number of  
34 services identified would have been unfeasible to include in their entirety in the trial's  
35 participant follow-up survey, but that may be important in some other studies. For example, if  
36 it was considered that sites clearly varied in provision of key services, gaining high quality  
37 information about such site characteristics could inform more informative analysis such as  
38 multi-level modelling. Finally, we initially explored the nature of available services with  
39 professionals, and only then asked mothers about services actually used via a mostly  
40 structured list of options. An exploratory exercise with mothers may well have shed light on  
41 other potential relevant services.

42 In effectiveness trials existing services could respond by augmenting support to those in the  
43 control arm. Such performance bias limits generalizability especially if that support was very  
44 different from usual care and approaching the level of support provided by the new  
45 intervention. Our findings do not indicate this in general and specifically for community  
46 midwifery and health visiting, the two most closely aligned universal services. However  
47 determining only the number of contacts may mask enhanced support provided in the form of  
48 longer contacts, or contacts from specialist practitioners. Community midwives visits were  
49 equivalent between trials arms and the difference in contacts with health visitors was  
50 attributable to clinic rather than home visits and therefore unlikely to be substantial. There  
51 was some indication that women in the usual care arm with some additional objective need  
52 identified at baseline, such as experience of homelessness, received more home visits.  
53 However, providing enhanced care to clients most in need would be usual practice. Evidence  
54 that this occurred in a trial context is not in itself a threat to external validity. The large  
55 caseloads managed by health visitors emphasises the lack of opportunity to provide  
56 significant additional support to mothers allocated to usual care.<sup>10</sup>

57 Our trial found fewer short-term benefits than previous US trials despite FNP being well  
58 implemented.<sup>1-3, 8</sup> The population we studied differed from that in the US, for example by

c:\programdata\activepdf\dc\_ent\tmp\456441\28623087\_file000006\_653285914.docx

1  
2  
3 being fundamentally identified by maternal age and this may have contributed to some  
4 differences in impact detected. The upper age limit for women in the US trials was greater in  
5 each case than in England, and they also could have been enrolled at a later stage of  
6 gestation, for example, before delivery in Denver. In the three US trials the intervention had  
7 been provided by a total of 5 (Elmira), 12 (Memphis) and 10 (Denver) nurses in single areas  
8 with study samples of 400, 1138 and 735 women respectively. In our trial 131 nurses  
9 delivered the intervention across 18 local sites. The English service context would have been  
10 very different. Some additional standardised support in the form of developmental screening  
11 and referral, and free travel to appointments was provided to women in the control arm of  
12 each US trial. However, the broad and layered range of services identified in our study would  
13 not have been available. The broader adverse social context present in the first US trial and  
14 from which much longer-term evidence has been derived has limited direct comparison. For  
15 example, at the inception of the first US trial, Elmira was ranked bottom of all 380 US  
16 metropolitan statistical areas in terms of economic conditions. That is not to say that women  
17 in our trial were free of disadvantage or had services that fully met their needs. However,  
18 substantial differences across trial settings and the substantial duration between the trials are  
19 likely to have varied the potential for beneficial impact.

20 Service provision may change over time and any single mapping exercise will miss this real-  
21 world dynamic. We conducted telephone interviews with five FN supervisors towards the end  
22 of the trial. These explored whether there had been any key changes to local service  
23 provision. Recent major change was mostly not identified as occurring although the reduction  
24 in Connexions services was flagged up. Quantification of service use should be open to the  
25 capture of newer services. Additionally, with superficial service names not always reflecting  
26 well actual support provided it is important to look beyond service labels. Finally, high-level  
27 service descriptions do not always represent the often complex multi-professional interactions  
28 which necessarily facilitate service delivery. This emphasises the need for adequate  
29 qualitative description and interpretation of services.

30 Loss to follow-up at assessment points may introduce bias into the descriptive analysis. We  
31 have previously reported on group differences in attrition apparent at 24 months follow-up  
32 however such, differences were small.<sup>10</sup> A second consideration is the level of detail available  
33 for health visitor and midwifery contacts (eg, visit duration). It is reasonable to assume that  
34 given capacity and opportunity, women in the UC arm visited by health professionals would  
35 have received greater attention than other clients perceived as less in need. This is consistent  
36 with their professional role and reflective of contemporary best usual practice.<sup>15</sup> It is also  
37 possible that women in the FNP arm received relatively less attention than non-FNP clients if  
38 they were seen to be receiving enhanced support. Nevertheless, the total number of home  
39 and clinic visits received in both trial arms was small compared to that provided by FNP  
40 nurses. Future process evaluations should model the impact upon existing services of such  
41 service innovation to both avoid unintended consequences (eg, service displacement) and  
42 maximise synergy across services.

43 Moore and colleagues recommend primarily qualitative methods for capturing unanticipated  
44 or complex intervention pathways, which in this instance we take to be impact upon co-  
45 existing services.<sup>17</sup> They also emphasised the need to capture the mechanisms using logic  
46 models including where these reflected broader context. The extent to which an intervention's  
47 impact could actually induce harm either at the individual level or within a system can further  
48 be reflected by use of a dark logic model.<sup>18</sup> Bonell and colleagues recommend approaches to  
49 developing such a logic model, for example, by hypothesising how the agency of key  
50 stakeholders may interact with social structures to produce unintended consequences.  
51 Reflection in such model building could be informed by the use of mid-range sociological or  
52 psychological theory. This could also be combined with exploratory qualitative work with local  
53 stakeholders (eg service managers or practitioners) well placed to observe both intended and  
54 unintended intervention impacts. This is also consistent with approaches which recognise the  
55 implementation of public health interventions occurring within complex adaptive social  
56 systems, such as May's Normalisation Process Theory.<sup>19</sup> NPT identifies implementation as  
57 occurring in a dynamic, non-linear and emergent fashion. This offers a broader theoretical  
58 context within which to explore not only how one intervention becomes adapted to its  
59

c:\programdata\activepdf\dc\_ent\tmp\456441\28623087\_file000006\_653285914.docx

1  
2  
3 environment and may vary but also how that social context and usual services may also  
4 become adapted too.

5  
6 The effectiveness of a public health intervention can only be adequately evaluated with a  
7 sound understanding of the service context within which it operates and which may also form  
8 the trial comparator.<sup>16</sup> Describing and quantifying the nature of usually available services can  
9 be challenging especially when services arise from a number of sectors, may evolve over the  
10 period of study and vary across study sites. In mapping the pattern of support potentially  
11 available to participants in our trial we have gained a critical understanding of the context  
12 within which and against which FNP should be considered. In quantifying maternal reported  
13 service usage we have provided key insights into how our main trial results should therefore  
14 be interpreted. While challenging, we remain convinced of the need to develop this area of  
15 research when evaluating public health interventions. Indeed, in their feedback survey  
16 respondents reported the usefulness of the exercise in gaining greater insights about local  
17 services, some sharing the generated service summaries with their teams.  
18  
19  
20  
21  
22  
23  
24  
25  
26  
27  
28  
29  
30  
31  
32  
33  
34  
35  
36  
37  
38  
39  
40  
41  
42  
43  
44  
45  
46  
47  
48  
49  
50  
51  
52  
53  
54  
55  
56  
57  
58  
59  
60

c:\programdata\activepdf\dc\_ent\tmp\456441\28623087\_file000006\_653285914.docx

## ACKNOWLEDGEMENTS

The authors gratefully acknowledge the contribution of Dr Lesley Wye, University of Bristol and Dr Marie-Jet Bekkers who contributed to some of the planning and implementation of the reported study, and to all other members of the broader Building Blocks research team who supported overall trial delivery. We are grateful to each local site informant who contributed to data collection in either of the two rounds of service mapping and especially to the three local coordinators who initially piloted our mapping tool. We are also grateful to all women who participated in the trial and for their time in completing outcome and resource assessments.

## COMPETING INTERESTS

Prior to working on the Building Blocks trial, Sue Channon facilitated two workshops on Motivational Interviewing for supervisors within the FNP. The authors declare no competing interests.

## CONTRIBUTORS

MR, KH and JS conceived the study and all authors contributed to the development of its protocol. MR wrote the first draft with further contributions from all authors. RP, JS and GM were involved in data collection and management. RP was responsible for developing the survey of local stakeholders and GM was responsible for managing data collected from trial participants used in the analysis. RP, RCJ, GM and MR were involved in analysis and developing summary tables for publication. SC and JS were responsible for the management of this package of work within the trial overall. MR was responsible for obtaining study funding. All authors contributed to data interpretation, reviewed successive drafts and approved the final version of the manuscript.

## ETHICS

The trial was approved by the Wales NHS Research Ethics Committee (09/MRE09/08) and received governance approval from all participating NHS sites. All women provided written informed consent.

## PARTICIPANT CONSENT

All participants provided written informed consent to take part in the study.

## FUNDING

The Centre for Trials Research, Cardiff University is funded by the Welsh Government through Health and Care Research Wales and the authors gratefully acknowledge the Centre's contribution to study implementation. This is an independent report commissioned, sponsored and funded by the Policy Research Programme in the Department of Health (reference no. 006/0060). The views expressed are not necessarily those of the Department of Health.

## DATA SHARING

The datasets generated and analysed during the current study are not publicly available as contributors / participants may be identifiable and are also subject to sponsor approval, but may be available from the corresponding author on reasonable request.

c:\programdata\activepdf\dc\_ent\tmp\456441\28623087\_file000006\_653285914.docx

## References

1. Olds DL, Henderson CR, Jr., Chamberlin R, Tatelbaum R. Preventing child abuse and neglect: a randomized trial of nurse home visitation. *Pediatrics* 1986; 78 (1): 65-78.
2. Kitzman H, Olds DL, Henderson CR, Jr., et al. Effect of Prenatal and Infancy Home Visitation by Nurses On Pregnancy Outcomes, Childhood Injuries, and Repeated Childbearing: A Randomised Controlled Trial. *JAMA* 1997; 278 (8): 644-52.
3. Olds DL, Robinson J, O'Brien R, et al. Home Visiting by Paraprofessionals and by Nurses: A Randomized, Controlled Trial. *Pediatrics* 2002; 110 (3): 486-96.
4. Barnes J, Ball M, Meadows P et al. Nurse-Family Partnership Programme: First Year Pilot Sites Implementation in England - Pregnancy and the Post-partum Period. London: Birkbeck, University of London; 2008.
5. Barnes J, Ball M, Meadows P et al. Nurse-Family Partnership Programme: Second Year Pilot Sites Implementation in England - The Infancy Period. London: Birkbeck, University of London; 2009.
6. Barnes J, Ball M, Meadows P, et al. The Family-Nurse Partnership Programme in England: Wave 1 implementation in toddlerhood & a comparison between Waves 1 and 2a of implementation in pregnancy and infancy. London: Institute for the Study of Children, Families and Social Issues: Birkbeck, University of London, 2011.
7. Owen-Jones E, Bekkers M-J, Butler CC, et al. The effectiveness and cost-effectiveness of the Family Nurse Partnership home visiting programme for first time teenage mothers in England: a protocol for the Building Blocks randomised controlled trial. *BMC Pediatrics* 2013; 13 (1): 114.
8. Robling M, Bekkers M-J, Bell K, et al. Effectiveness of a nurse-led intensive home-visitaton programme for first-time teenage mothers (Building Blocks): a pragmatic randomised controlled trial. *Lancet* 2015; published online Oct 14. [http://dx.doi.org/10.1016/S0140-6736\(15\)00392-X](http://dx.doi.org/10.1016/S0140-6736(15)00392-X).
9. NVivo qualitative data analysis Software; QSR International Pty Ltd. Version 8, 2008
10. Robling MR Bekkers M-J, Bell K et al. Evaluating the Family Nurse Partnership Programme in England: A Randomised Controlled Trial. Final report to The Department of Health. 2015. (<http://bit.ly/buildingblockstrial>).
11. Knight JR, Sherritt L, Shrier LA et al Validity of the CRAFFT substance abuse screening test among adolescent clinic patients. *Arch Pediatr Adolesc Med* 2002, 156(6):607–614.[CRAFFT].
12. Hotopf M, Rayner L, Valsraj K. Improving 'Whole Person Care' A report on mental health related services offered by King's Health Partners' acute trusts: King's Health Partners, 2012.
13. Challis D, Darton R, Donnelly M et al. Mapping and evaluation of care management arrangements for older people and those with menatal health problems in an integrated health and social services system: a comparative study: The Personal Social Services Research Unit, 1999.
14. Health Do. Children's services mapping. A complete picture of children's service provision: Department of Health. Department for Children Schools and Families, 2010.
15. NICE. Pregnancy and complex social factors: A model for service provision for pregnant women with complex social factors. London, 2010.
16. Smelt AFH, van der Weele GM, Blom JW et al. How usual is usual care in pragmatic intervention studies in primary care? An overview of recent trials. *British Journal of General Practice* 2010 e305.
17. Moore GF, Audrey S, Barker M, Bond L, Bonell C, Hardeman W, Moore L, O'Cathain A, Tinati T, Wight D, Baird J. Process evaluation of complex interventions: Medical Research Council guidance. *BMJ* 2015;350:h1258 doi:10.1136/bmj.h1258
18. Bonell C, Jamal F, Melendez-Torres GJ, Cummins S. 'Dark logic': theorising the harmful consequences of public health interventions. *Epidemiol Community Health* 2015;69:95–98.
19. May CR, Johnson M, Finch T. Implementation, context and complexity. *Implementation Science* (2016) 11:141

## Appendix 1

## Example of service mapping content / user instructions from 'Education' worksheet

| <i>Please describe services available for teenage, first-time mothers in your area</i> | <b>Name of service (If applicable)</b>                                                                         | <b>Description of service / Care</b>                                                                                                                          | <b>Are there any limits on the availability of this service? E.g., Number of women that can be offered the service</b>                   |
|----------------------------------------------------------------------------------------|----------------------------------------------------------------------------------------------------------------|---------------------------------------------------------------------------------------------------------------------------------------------------------------|------------------------------------------------------------------------------------------------------------------------------------------|
| <b><i>Is there a Mother and Baby hostel in your area?</i></b>                          | Mother and baby hostels                                                                                        | Dedicated hostels for homeless women who are pregnant or have a new baby. Additional support both from trained staff                                          | Some will take young women in the early stages of pregnancy (up to 6 months approx). Some will not house pregnant women, or young babies |
| <b><i>What temporary accommodation can be offered?</i></b>                             | Hostels                                                                                                        | Temporary accommodation with varying degrees of support, usually containing some shared facilities                                                            | Most require assessment of eligibility and suitability. Not usually suitable for those under 18, or youths with offending behaviour.     |
| <b><i>Temporary accommodation (for the temporary homeless)?</i></b>                    | Emergency hostels and night shelters (or bed and breakfasts if nothing else is available - usu max of 6 weeks) | Offer somewhere to sleep, food, warmth and hygiene. Residents are normally asked to pay a small additional contribution for their meals.                      | Usually a direct access/first-come-first served basis. Night shelters are usually free. Most hostels charge.                             |
| <b><i>Charity involvement?</i></b>                                                     | LIFE Housing                                                                                                   | Provides a support service (General Support, Individual Support Plans and the LIFE Skills Programme) and community outreach schemes                           | (Not specified)                                                                                                                          |
| <b><i>Foyers</i></b>                                                                   | Foyers                                                                                                         | Integration of accommodation and support services: training in basic/independent living skills, inc. ongoing support when the young person has left the Foyer | Most foyers have a waiting list. Some foyers only accept referrals from local councils                                                   |
| <b><i>Women's refuges</i></b>                                                          | Women's refuges                                                                                                | A refuge is a safe house where women and children who are experiencing domestic violence can stay free from abuse                                             | Refuges are highly unlikely to accept women from their immediate local area. Some are for women w/ part' ethnic/cultural backgrounds     |
| <b><i>Housing Associations / RSLs (Registered Social Landlords)</i></b>                | Housing associations / RSLs (Registered Social Landlords)                                                      | Provide homes for people on low incomes. Some housing associations specialise in accommodation for particular groups of people, such as younger people        | Long waiting list. Chance of place/waiting time depends on personal circumstances (e.g. children), and other factors                     |
| <b><i>Supported lodgings schemes</i></b>                                               | Supported lodgings                                                                                             | Individuals in the community offer a room in their home with varying degrees of support. A safe and supportive environment for young people                   | Suitable for youths: leaving care, deemed vulnerable and in need, requiring temp acc, or with no statutory entitlement to housing        |



|    |                              |                                                                                 |                                                                                                                                                                                                                                                      |                                                                                                                                                                                                                         |
|----|------------------------------|---------------------------------------------------------------------------------|------------------------------------------------------------------------------------------------------------------------------------------------------------------------------------------------------------------------------------------------------|-------------------------------------------------------------------------------------------------------------------------------------------------------------------------------------------------------------------------|
| 1  | <b>Supported housing</b>     | Self-contained, cluster and shared arrangements with varying degrees of support | Supported housing will usually provide housing-related support to help a young person prepare for independent living                                                                                                                                 | Many schemes accessible via social services' leaving care arrangements, and via housing departments for young homeless people                                                                                           |
| 2  |                              |                                                                                 |                                                                                                                                                                                                                                                      |                                                                                                                                                                                                                         |
| 3  |                              |                                                                                 |                                                                                                                                                                                                                                                      |                                                                                                                                                                                                                         |
| 4  | <b>Mainstream housing</b>    | Independent accommodation                                                       | Independent accommodation. Housing & social services may have arrangements w/ private landlords to provide accommodation for vulnerable youths                                                                                                       | Housing benefit restrictions apply to under 25s living in the private sector and applicants are limited to the single-room rent housing benefit level                                                                   |
| 5  |                              |                                                                                 |                                                                                                                                                                                                                                                      |                                                                                                                                                                                                                         |
| 6  |                              |                                                                                 |                                                                                                                                                                                                                                                      |                                                                                                                                                                                                                         |
| 7  |                              |                                                                                 |                                                                                                                                                                                                                                                      |                                                                                                                                                                                                                         |
| 8  | <b>Nightstop schemes</b>     | Emergency accommodation (Depaul Nightstop UK)                                   | Nightstop schemes provide emergency accommodation for young homeless people aged 16–25 in the homes of a network of volunteer hosts                                                                                                                  | Referrals to service after risk assessments by a recognised agency; such as social services, Connexions, police, housing depts                                                                                          |
| 9  |                              |                                                                                 |                                                                                                                                                                                                                                                      |                                                                                                                                                                                                                         |
| 10 |                              |                                                                                 |                                                                                                                                                                                                                                                      |                                                                                                                                                                                                                         |
| 11 |                              |                                                                                 |                                                                                                                                                                                                                                                      |                                                                                                                                                                                                                         |
| 12 | <b>Supported housing</b>     | Supported housing schemes                                                       | Housing schemes offering accommodation linked with on-site or outreach support from dedicated staff (practical and emotional help)                                                                                                                   | Schemes vary in size                                                                                                                                                                                                    |
| 13 |                              |                                                                                 |                                                                                                                                                                                                                                                      |                                                                                                                                                                                                                         |
| 14 |                              |                                                                                 |                                                                                                                                                                                                                                                      |                                                                                                                                                                                                                         |
| 15 |                              |                                                                                 |                                                                                                                                                                                                                                                      |                                                                                                                                                                                                                         |
| 16 |                              |                                                                                 |                                                                                                                                                                                                                                                      |                                                                                                                                                                                                                         |
| 17 | <b>Custodial institution</b> | Secure Children's Homes                                                         | Concentrate on physical, emotional, behavioural needs, & aim to give youths individually tailored support to resolve the issues that led them to commit an offence                                                                                   | These are relatively small institutions, with between 6 and 40 beds and a high staff to young person ratio                                                                                                              |
| 18 |                              |                                                                                 |                                                                                                                                                                                                                                                      |                                                                                                                                                                                                                         |
| 19 |                              |                                                                                 |                                                                                                                                                                                                                                                      |                                                                                                                                                                                                                         |
| 20 |                              |                                                                                 |                                                                                                                                                                                                                                                      |                                                                                                                                                                                                                         |
| 21 | <b>Floating support</b>      | Floating support services                                                       | To sustain a tenancy through the dev' of independent living skills. Provides general, non-specialist support with daily living skills, practical tasks or emotional support which promotes or maintains a person's ability to live in their own home | Reviews of the progress and support plan ensure that the services adjust appropriately to changing needs. An exit strategy determines when support is withdrawn. If a person needs support later, it can return to them |
| 22 |                              |                                                                                 |                                                                                                                                                                                                                                                      |                                                                                                                                                                                                                         |
| 23 |                              |                                                                                 |                                                                                                                                                                                                                                                      |                                                                                                                                                                                                                         |
| 24 |                              |                                                                                 |                                                                                                                                                                                                                                                      |                                                                                                                                                                                                                         |
| 25 |                              |                                                                                 |                                                                                                                                                                                                                                                      |                                                                                                                                                                                                                         |
| 26 |                              |                                                                                 |                                                                                                                                                                                                                                                      |                                                                                                                                                                                                                         |
| 27 |                              |                                                                                 |                                                                                                                                                                                                                                                      |                                                                                                                                                                                                                         |

## Building Blocks Service Mapping Report

STROBE Statement—checklist of items that should be included in reports of observational<sup>1</sup> studies

|                           | Item No | Recommendation                                                                                                                                                                                                                                                                                                                                                                                                                                                         | Page       |
|---------------------------|---------|------------------------------------------------------------------------------------------------------------------------------------------------------------------------------------------------------------------------------------------------------------------------------------------------------------------------------------------------------------------------------------------------------------------------------------------------------------------------|------------|
| <b>Title and abstract</b> | 1       | (a) Indicate the study's design with a commonly used term in the title or the abstract                                                                                                                                                                                                                                                                                                                                                                                 | 1          |
|                           |         | (b) Provide in the abstract an informative and balanced summary of what was done and what was found                                                                                                                                                                                                                                                                                                                                                                    | 2          |
| <b>Introduction</b>       |         |                                                                                                                                                                                                                                                                                                                                                                                                                                                                        |            |
| Background/rationale      | 2       | Explain the scientific background and rationale for the investigation being reported                                                                                                                                                                                                                                                                                                                                                                                   | 3          |
| Objectives                | 3       | State specific objectives, including any prespecified hypotheses                                                                                                                                                                                                                                                                                                                                                                                                       | 3          |
| <b>Methods</b>            |         |                                                                                                                                                                                                                                                                                                                                                                                                                                                                        |            |
| Study design              | 4       | Present key elements of study design early in the paper                                                                                                                                                                                                                                                                                                                                                                                                                | 3, 4       |
| Setting                   | 5       | Describe the setting, locations, and relevant dates, including periods of recruitment, exposure, follow-up, and data collection                                                                                                                                                                                                                                                                                                                                        | 4, 5, 6, 9 |
| Participants              | 6       | (a) <i>Cohort study</i> —Give the eligibility criteria, and the sources and methods of selection of participants. Describe methods of follow-up<br><i>Case-control study</i> —Give the eligibility criteria, and the sources and methods of case ascertainment and control selection. Give the rationale for the choice of cases and controls<br><i>Cross-sectional study</i> —Give the eligibility criteria, and the sources and methods of selection of participants | 5          |
|                           |         | (b) <i>Cohort study</i> —For matched studies, give matching criteria and number of exposed and unexposed<br><i>Case-control study</i> —For matched studies, give matching criteria and the number of controls per case                                                                                                                                                                                                                                                 | NA         |
| Variables                 | 7       | Clearly define all outcomes, exposures, predictors, potential confounders, and effect modifiers. Give diagnostic criteria, if applicable                                                                                                                                                                                                                                                                                                                               | 10-14      |
| Data sources/measurement  | 8*      | For each variable of interest, give sources of data and details of methods of assessment (measurement). Describe comparability of assessment methods if there is more than one group                                                                                                                                                                                                                                                                                   | 10-14      |
| Bias                      | 9       | Describe any efforts to address potential sources of bias                                                                                                                                                                                                                                                                                                                                                                                                              | NA         |
| Study size                | 10      | Explain how the study size was arrived at                                                                                                                                                                                                                                                                                                                                                                                                                              | 4          |
| Quantitative variables    | 11      | Explain how quantitative variables were handled in the analyses. If applicable, describe which groupings were chosen and why                                                                                                                                                                                                                                                                                                                                           | 5          |
| Statistical methods       | 12      | (a) Describe all statistical methods, including those used to control for confounding                                                                                                                                                                                                                                                                                                                                                                                  | 5          |
|                           |         | (b) Describe any methods used to examine subgroups and interactions                                                                                                                                                                                                                                                                                                                                                                                                    | NA         |
|                           |         | (c) Explain how missing data were addressed                                                                                                                                                                                                                                                                                                                                                                                                                            | 9*         |
|                           |         | (d) <i>Cohort study</i> —If applicable, explain how loss to follow-up was addressed<br><i>Case-control study</i> —If applicable, explain how matching of cases and controls was addressed<br><i>Cross-sectional study</i> —If applicable, describe analytical methods taking                                                                                                                                                                                           | NA         |

|                                       |    |
|---------------------------------------|----|
| account of sampling strategy          |    |
| (e) Describe any sensitivity analyses | NA |

| <b>Results</b>           |     |                                                                                                                                                                                                              |                  |
|--------------------------|-----|--------------------------------------------------------------------------------------------------------------------------------------------------------------------------------------------------------------|------------------|
| Participants             | 13* | (a) Report numbers of individuals at each stage of study—eg numbers potentially eligible, examined for eligibility, confirmed eligible, included in the study, completing follow-up, and analysed            | 9*               |
|                          |     | (b) Give reasons for non-participation at each stage                                                                                                                                                         | 9*               |
|                          |     | (c) Consider use of a flow diagram                                                                                                                                                                           | 9*               |
| Descriptive data         | 14* | (a) Give characteristics of study participants (eg demographic, clinical, social) and information on exposures and potential confounders                                                                     | 9*               |
|                          |     | (b) Indicate number of participants with missing data for each variable of interest                                                                                                                          | 10-14            |
|                          |     | (c) <i>Cohort study</i> —Summarise follow-up time (eg, average and total amount)                                                                                                                             | 10-14            |
| Outcome data             | 15* | <i>Cohort study</i> —Report numbers of outcome events or summary measures over time                                                                                                                          | 10-14            |
|                          |     | <i>Case-control study</i> —Report numbers in each exposure category, or summary measures of exposure                                                                                                         | -                |
|                          |     | <i>Cross-sectional study</i> —Report numbers of outcome events or summary measures                                                                                                                           | -                |
| Main results             | 16  | (a) Give unadjusted estimates and, if applicable, confounder-adjusted estimates and their precision (eg, 95% confidence interval). Make clear which confounders were adjusted for and why they were included | 10-14            |
|                          |     | (b) Report category boundaries when continuous variables were categorized                                                                                                                                    | NA               |
|                          |     | (c) If relevant, consider translating estimates of relative risk into absolute risk for a meaningful time period                                                                                             | NA               |
| Other analyses           | 17  | Report other analyses done—eg analyses of subgroups and interactions, and sensitivity analyses                                                                                                               | NA               |
| <b>Discussion</b>        |     |                                                                                                                                                                                                              |                  |
| Key results              | 18  | Summarise key results with reference to study objectives                                                                                                                                                     | 14,15            |
| Limitations              | 19  | Discuss limitations of the study, taking into account sources of potential bias or imprecision. Discuss both direction and magnitude of any potential bias                                                   | 15,16            |
| Interpretation           | 20  | Give a cautious overall interpretation of results considering objectives, limitations, multiplicity of analyses, results from similar studies, and other relevant evidence                                   | 14,<br>15,<br>17 |
| Generalisability         | 21  | Discuss the generalisability (external validity) of the study results                                                                                                                                        | 16               |
| <b>Other information</b> |     |                                                                                                                                                                                                              |                  |
| Funding                  | 22  | Give the source of funding and the role of the funders for the present study and, if applicable, for the original study on which the present article is based                                                | 18               |

1 The paper reports an analysis from the process evaluation (including descriptive analysis of service usage data) from a cohort of women participating in a randomised control trial

\* Citation to full main trial report included in text

# BMJ Open

**What is usual care for teenagers expecting their first child in England?: a process evaluation using key informant mapping and participant survey as part of the Building Blocks randomised controlled trial of specialist home visiting.**

|                                 |                                                                                                                                                                                                                                                                                                                                                                                                                                                                                                                           |
|---------------------------------|---------------------------------------------------------------------------------------------------------------------------------------------------------------------------------------------------------------------------------------------------------------------------------------------------------------------------------------------------------------------------------------------------------------------------------------------------------------------------------------------------------------------------|
| Journal:                        | <i>BMJ Open</i>                                                                                                                                                                                                                                                                                                                                                                                                                                                                                                           |
| Manuscript ID                   | bmjopen-2017-020152.R2                                                                                                                                                                                                                                                                                                                                                                                                                                                                                                    |
| Article Type:                   | Research                                                                                                                                                                                                                                                                                                                                                                                                                                                                                                                  |
| Date Submitted by the Author:   | 16-Feb-2018                                                                                                                                                                                                                                                                                                                                                                                                                                                                                                               |
| Complete List of Authors:       | Robling, Michael; Cardiff University, Centre for Trials Research<br>Cannings John, Rebeca; Cardiff University, Centre for Trials Research<br>Channon, Sue; Cardiff University, Centre for Trials Research<br>Hood, Kerenza; Cardiff University, South East Wales Trials Unit, Centre for Trials Research<br>Moody, Gwenllian; Cardiff University, Centre for Trials Research<br>Poole, Ria; Cardiff University, Medicine<br>Sanders, Julia; School of Healthcare Sciences, Room 12:15, Eastgate House, 35-43 Newport Road |
| <b>Primary Subject Heading</b>: | Public health                                                                                                                                                                                                                                                                                                                                                                                                                                                                                                             |
| Secondary Subject Heading:      | Public health, Qualitative research, Research methods                                                                                                                                                                                                                                                                                                                                                                                                                                                                     |
| Keywords:                       | Organisation of health services < HEALTH SERVICES ADMINISTRATION & MANAGEMENT, PAEDIATRICS, Child protection < PAEDIATRICS, PUBLIC HEALTH                                                                                                                                                                                                                                                                                                                                                                                 |
|                                 |                                                                                                                                                                                                                                                                                                                                                                                                                                                                                                                           |

SCHOLARONE™  
Manuscripts

1  
2  
3 **Title: What is usual care for teenagers expecting their first child in England?:**  
4 **a process evaluation using key informant mapping and participant survey**  
5 **as part of the Building Blocks randomised controlled trial of specialist home**  
6 **visiting.**  
7  
8  
9  
10  
11

12 **Corresponding author:**  
13

14 **Prof Mike Robling**  
15 **Centre for Trials Research, Cardiff University**  
16 **Neuadd Meirionnydd, Heath Park, Cardiff. CF14 4YS**  
17 [robtingmr@cardiff.ac.uk](mailto:robtingmr@cardiff.ac.uk)  
18 **+44 (0)29 2068 7177**  
19  
20

21 **Authors:**  
22

- 23 • Mike Robling, Centre for Trials Research, Cardiff University, Cardiff,  
24 Wales, UK
- 25 • Rebecca Cannings-John, Centre for Trials Research, Cardiff  
26 University, Cardiff, Wales, UK
- 27 • Sue Channon, Centre for Trials Research, Cardiff University, Cardiff,  
28 Wales, UK
- 29 • Kerry Hood, Centre for Trials Research, Cardiff University, Cardiff,  
30 Wales, UK
- 31 • Gwen Moody, Centre for Trials Research, Cardiff University, Cardiff,  
32 Wales, UK
- 33 • Ria Poole, School of Medicine, Cardiff University, Cardiff, Wales, UK
- 34 • Julia Sanders, School of Healthcare Sciences, Cardiff University,  
35 Cardiff, Wales, UK
- 36
- 37

38  
39 **Key words:** Public health, child health, nursing, randomised trial  
40

41 **Current abstract word count:** 299

42 **Current manuscript word count:** 4080

43 **Reference count:** 19  
44  
45  
46  
47  
48  
49  
50  
51  
52  
53  
54  
55  
56  
57  
58  
59  
60

1  
2  
3  
4 **Title: What is usual care for teenagers expecting their first child in England?: a**  
5 **process evaluation using key informant mapping and participant survey as part of the**  
6 **Building Blocks randomised controlled trial of specialist home visiting.**

7 **Abstract**

8  
9 **Objectives**

10 We compared the US-derived Family Nurse Partnership (FNP) home visiting programme  
11 when added to usually provided health and social care for first-time teenage mothers, to usual  
12 care alone. We aimed to: establish the nature of usual care, measure service usage and  
13 assess performance bias in core usual care services.

14 **Design**

15 Within trial process evaluation. Local professionals completed a survey mapping local health  
16 and social care services in seven domains. This focused on services available to young  
17 women, especially those relevant to pregnant teenagers. Descriptive data were assessed  
18 thematically to establish the range of services. Quantitative data collection with FNP  
19 supervisors enumerated service provision by site. Services identified were included in main  
20 participant trial follow-up interviews at four time-points to quantify usage. Usage was  
21 described descriptively by domain. We explored predictors of health visitor visits.

22 **Setting**

23 Eighteen partnerships of local authority and healthcare organisations in England.

24 **Outcomes**

25 Descriptive framework of services. Rates of service usage reported by trial participants.

26 **Results**

27  
28 161 separate services were identified, with multiple service models in each domain, broadly  
29 categorised as universal or specialist (eg for teenage mothers). FNP supervisors identified  
30 30-63 universal services per site and 22-67 specialist services. Use of core maternity care  
31 services were similar across trial arms and with only small differences in use of health visiting  
32 services. Participants accessed a wide range of services. Women who had ever been  
33 homeless, who had a higher subjectively defined social status, and poorer mental health  
34 received more visits from a health visitor.

35 **Conclusions**

36 The large number of services available to teenage mothers in England may limit the  
37 incremental benefit achievable through enhanced home visiting. There was little evidence of  
38 compensatory practice, such as additional care for women in the usual care arm. Measuring  
39 usual care when trialling complex interventions is challenging and essential.  
40  
41  
42  
43  
44  
45  
46  
47  
48  
49  
50  
51  
52  
53  
54  
55  
56  
57  
58  
59  
60

### Strengths and limitations of this study

- The identification of sometimes multiple local stakeholders and drawing upon their existing knowledge using a semi-structured self-completion tool about a range of relevant services enabled us to develop a rich picture of what may be usually available care for teenagers expecting their first child.
- Undertaking the initial mapping exercise enabled us to develop a more informed service use inventory with greater content validity than may otherwise have been possible.
- The combination of professionally-led key informant mapping and detailed service use recording as part of trial follow-up data collection therefore provides a more nuanced understanding of usual care. This greater understanding of the trial's control condition enhances interpretation of trial results.
- However, changes over time, and within and between site differences in how services are configured, perceived and understood means that a summary statement about all locally relevant services will need to be intermittently revisited.
- Although we have an understanding about how services were similarly or differently accessed by intervention and control participants in the trial, the intensity and duration of individual sessions for non-FNP services is not known. However, comprehensively attempting to collect such detailed data from trial participants would probably not be feasible in practice

## INTRODUCTION

Individual, social, and economic circumstances faced by teenage mothers can challenge a successful start for their children. Responding in 2006, the Government in England adopted a preventative US-derived programme of nurse-led intensive home-visiting, the Family Nurse Partnership (FNP). Specially trained family nurses support first-time mothers through up to 64 home visits starting in early pregnancy and until the child reaches their second birthday. In three US trials, the programme has been evaluated with differing socio-demographic populations, justifying initial testing in a UK context.<sup>1-3</sup>

Following an implementation evaluation, 18 English Primary Care Trust (PCT) sites participated in the Building Blocks trial (ISRCTN23019866) of the programme's effectiveness recruiting 1645 teenagers expecting their first child.<sup>4-8</sup> The sites were dispersed across the UK, and covered two rural and 16 city areas. Women were recruited before 25 weeks gestation, lived within geographical areas served by the FNP team and spoke at least conversational English. Assessing over 60 short-term outcomes (to 24 months post-partum) in domain areas of pregnancy and birth, child development, and maternal life-course, four primary outcomes of programme and policy interest were prioritised.

We compared FNP when added to usually provided health and social care to usual care alone. In the absence of comprehensive public healthcare in the US, across all three previous evaluations the counterfactual was reported as obstetric office-based antenatal care, paediatric developmental screening, referral at specified time points and free transport to office-based consultations. Elevating the control condition to just more than simply no care, the augmented control condition was not further described. Given the provision of free universal health services in the UK, the ethical trial comparator was an active control condition. However, it was expected that what would be available to young families may be complex and vary by site and over time.

We aimed to map and quantify usually provided care and so clarify the trial's control condition, the service context into which FNP was introduced and allow exploration of any performance bias affecting validity of the trial comparison.

## METHODS

We first elicited and mapped usual services available locally at each of the 18 trial sites. Each site comprised collaborative partnerships between National Health Service (NHS) organisations and local authorities. All sites had applied to the Department of Health to be a provider of FNP including by demonstrating local clinical need and commitment to sustain local programme delivery. Sites included urban and rural settings across England and encompassed each of the ten strategic health authorities in England. Second, we enumerated services accessed by participants in both trial arms.

### *Eliciting and mapping services*

A mapping tool was drafted using an Excel worksheet following discussion within the research team. This sought to identify services available for pregnant teenagers and young families across seven initial domains: midwifery, health visiting (specialist public health nurses), education, housing, social care and other services (e.g., Children's Centres) and funding schemes specifically for young parents). This would therefore include services that were also universally available, such as maternity care. The tool required the site contacts to provide the title of service and a brief description. It was piloted with local coordinators at three sites who described service characteristics (e.g., provider, eligibility criteria) and were debriefed by telephone interview to assess feasibility. An amended version, which incorporated completion instructions (Appendix 1), a worked example and study information, was circulated via email in the first instance to each site principal investigator (e.g., the local FNP project lead and in all cases not a member of the research team) who then cascaded to local contacts across health and social care (usually managers or heads of services). By engaging with heads of services and other local professional staff (e.g. housing support workers) further detail about specific services or domains were provided, including



1  
2  
3 documentation on local services where available. Respondents were asked to provide details  
4 of “routinely provided services within their local authority which may be provided to young  
5 women, but may be especially relevant to pregnant teenagers”. In parallel with obtaining  
6 information describing available services, national policies and guidelines were sourced  
7 informing on the minimum expected standard of universally available services such as  
8 maternity care and state welfare (e.g. childcare vouchers). Mapping data were collected over  
9 six months.

10 Within sites and across respondents we reviewed submitted returns to identify missing or  
11 incomplete data (i.e., to identify the presence or absence of expected services / service  
12 descriptions) and followed up if necessary with local site contacts. This process was informed  
13 by documentary data provided by sites or available online. Data provided by sites were  
14 entered into NVivo 8<sup>9</sup> and analysed thematically by researchers who also involved service  
15 experts to review the developing coding framework before coming to a consensus on the final  
16 range of services available. A second round of online data collection addressing the same  
17 domains aimed to consolidate and confirm information already provided and to reduce  
18 variation that may be solely attributable to reporting bias. This comprised a structured form  
19 listing services by domain and tick boxes for respondents to indicate presence or absence.  
20 Free text (‘Other’) services allowed for unlisted services to be reported. Local FNP  
21 supervisors completed this form.

### 22 *Enumerating service by trial participants*

23 Trial participants were teenagers (aged 19 years or under at last menstrual period) expecting  
24 their first child, living in the catchment area for local FNP provision recruited before 25 weeks  
25 gestation, able to provide informed consent and competent to converse in English.<sup>7</sup> Access to  
26 supportive services within each core domain was measured as part of the trial’s follow-up  
27 outcome evaluation telephone interview schedule at late pregnancy, and 6, 12 and 18 months  
28 postpartum.<sup>7</sup> These included use of childcare, primary (eg, midwifery, GP, health visiting) and  
29 secondary (eg, A&E, Out-patient, In-patients) healthcare attendances, sexual health  
30 (contraceptive services), formal education, Connexions (a government funded support and  
31 advisory service for young people aged 13-19 years old), support with housing, and a range  
32 of additional support services. At 24 months additional questions asked about financial  
33 support.

34 Some data informed the separately reported cost-effectiveness analysis.<sup>10</sup> In the current  
35 analysis we describe the pattern of core service usage (eg, health visiting, midwifery,  
36 housing) for those in both trial arms, and the level of support provided additionally via FNP  
37 (for FNP clients, the Healthy Child Programme was delivered by FNs rather than by health  
38 visitors). Data on the latter were provided via the FNP national unit’s Information System. Use  
39 of services was analysed descriptively and is reported by service domain showing counts and  
40 proportions for those in the two trial arms separately. Multivariable logistic regression was  
41 used to explore whether certain maternal characteristics collected as part of the trial’s  
42 baseline assessment were associated with level of observed HV support. We created a  
43 binary variable of number of HV visits which distinguished between a standard / expected  
44 level of care (less than 4 visits) and enhanced care (4 or more visits). Univariable association  
45 were screened using a  $p < 0.10$  cut off and retained in the final multivariable model. Estimates  
46 are shown as odds ratios (ORs) and 95% confidence intervals (CIs).

## 46 **RESULTS**

### 47 *Eliciting and mapping services*

48 Round one was conducted in a six week period from August 2009. All sites responded, with  
49 at least six individual informants contributing data per site. A varying level of detail was  
50 provided about identified services. In general spreadsheets circulated to multiple stakeholders  
51 were more comprehensively completed.  
52  
53

54 Similar services within any one domain were subsequently grouped together even if labelled  
55 differently by informants. This resulted in 161 identified services, some with similar aims. An  
56 example was that of education provided to pregnant teenagers aged under 16 years old with  
57  
58  
59

1  
2  
3 eight different named services. In round two, conducted in July 2011, the 161 services were  
4 listed, categorised into 12 service domains (the original domains plus 'other services' sub-  
5 divided on the basis of stage 1 responses into childcare, complex needs, Connexions, drug  
6 and alcohol, mental health, third sector, and sexual health).

7  
8 The total number of services identified per site ranged from 52 to 113. These included  
9 between 26 and 53 universal services and between 22 and 86 locally available / specialist  
10 services. Services were provided by public, private and third sector organisations and  
11 collectively delivered direct care, support or guidance. Examples of Specialist and Locally  
12 available services for pregnant teenagers or younger parents are shown in table 1.  
13  
14  
15  
16  
17  
18  
19  
20  
21  
22  
23  
24  
25  
26  
27  
28  
29  
30  
31  
32  
33  
34  
35  
36  
37  
38  
39  
40  
41  
42  
43  
44  
45  
46  
47  
48  
49  
50  
51  
52  
53  
54  
55  
56  
57  
58  
59  
60

1  
2  
3  
4  
5  
6  
7  
8  
9  
10  
11  
12  
13  
14  
15  
16  
17  
18  
19  
20  
21  
22  
23  
24  
25  
26  
27  
28  
29  
30  
31  
32  
33  
34  
35  
36  
37  
38  
39  
40  
41  
42  
43  
44  
45  
46  
47

**Table 1: Service mapping – examples of services<sup>1</sup> described by study sites<sup>3</sup>**

| <b>Domain</b>                          | <b>Specialist services</b> - specifically for pregnant teenagers or younger parents                                                                                                                                   | <b>Locally Available services</b> - with a specialist nature and eligibility criteria, but not necessarily designed for teenage parents                                                                                                                                            |
|----------------------------------------|-----------------------------------------------------------------------------------------------------------------------------------------------------------------------------------------------------------------------|------------------------------------------------------------------------------------------------------------------------------------------------------------------------------------------------------------------------------------------------------------------------------------|
| <b>Education</b>                       | <ul style="list-style-type: none"> <li>• Schools / colleges with provision for teenage mums</li> <li>• Teenage pregnancy support services</li> <li>• Accredited courses with free child care for under 25s</li> </ul> | <ul style="list-style-type: none"> <li>• Home learning programmes</li> </ul>                                                                                                                                                                                                       |
| <b>Housing</b>                         | <ul style="list-style-type: none"> <li>• Teenage parents' scheme: training in independent living skills</li> <li>• Supported housing: young vulnerable women or teenage parents</li> </ul>                            | <ul style="list-style-type: none"> <li>• Outreach support service aimed at young homeless people under 18</li> <li>• Mother and Baby Hostel</li> </ul>                                                                                                                             |
| <b>Health Visiting</b>                 |                                                                                                                                                                                                                       | <ul style="list-style-type: none"> <li>• Antenatal contact at home or in midwife-led antenatal clinics</li> <li>• Minor ailments sessions run by health visitors</li> </ul>                                                                                                        |
| <b>Midwifery</b>                       | <ul style="list-style-type: none"> <li>• Teenage pregnancy midwives</li> <li>• Antenatal clinics run by midwives in schools</li> </ul>                                                                                | <ul style="list-style-type: none"> <li>• Midwives based in Children's Centres</li> </ul>                                                                                                                                                                                           |
| <b>Social Services</b>                 | <ul style="list-style-type: none"> <li>• Teenage pregnancy support service</li> </ul>                                                                                                                                 | <ul style="list-style-type: none"> <li>• Targeted youth support for vulnerable young people</li> <li>• Specialist therapeutic unit for young victims of sexual abuse</li> <li>• Family resource service; practical support to access universal services</li> </ul>                 |
| <b>Connexions Services<sup>2</sup></b> | <ul style="list-style-type: none"> <li>• Teenage Pregnancy Advisors help young mums-to-be and young families</li> </ul>                                                                                               | <ul style="list-style-type: none"> <li>• Provide information and guidance to Looked After young people</li> <li>• Provide support and guidance for young people leaving care</li> <li>• Provide practical help and advice for young mums who want to go back to college</li> </ul> |
| <b>Drugs, Alcohol and Smoking</b>      |                                                                                                                                                                                                                       | <ul style="list-style-type: none"> <li>• Specialist drugs and alcohol services working with police</li> <li>• Community-based young people's drugs and alcohol service</li> <li>• Smoking in Pregnancy cessation service</li> </ul>                                                |
| <b>Sexual Health</b>                   | <ul style="list-style-type: none"> <li>• Lifestyle services working with teenage parents to prevent second pregnancy</li> </ul>                                                                                       | <ul style="list-style-type: none"> <li>• Family planning services for under 25-yr-olds in community settings</li> <li>• Sexual health services for teenagers</li> <li>• Condom distribution scheme in community settings</li> </ul>                                                |

|                                          |                                                                                                                                                     |                                                                                                                                                                                                                                                                                                                                                                         |
|------------------------------------------|-----------------------------------------------------------------------------------------------------------------------------------------------------|-------------------------------------------------------------------------------------------------------------------------------------------------------------------------------------------------------------------------------------------------------------------------------------------------------------------------------------------------------------------------|
| <b>Mental Health services</b>            |                                                                                                                                                     | <ul style="list-style-type: none"> <li>• Specialist Children's and Adolescent Mental Health Services for eating disorders</li> <li>• Mother-and-baby units in hospitals and prisons</li> <li>• Specialist psychiatric unit for postnatal mental illness</li> </ul>                                                                                                      |
| <b>Complex Needs Childcare provision</b> | <ul style="list-style-type: none"> <li>• Support and advocacy for (pregnant) teenagers with complex needs</li> </ul>                                | <ul style="list-style-type: none"> <li>• Child development centre for pre-school children with complex needs</li> <li>• Sure Start language therapy team</li> <li>• Vulnerable baby service: targeted safeguarding prevention</li> <li>• Private, voluntary, independent childcare providers</li> <li>• Internet database on county-wide childcare provision</li> </ul> |
| <b>Local / third sector projects</b>     | <ul style="list-style-type: none"> <li>• Charity funded teen parents projects</li> <li>• Peer support sessions for teenage fathers-to-be</li> </ul> | <ul style="list-style-type: none"> <li>• Barnardo's Priory Family Centre</li> <li>• Charity funded young parents projects</li> <li>• Home Start: trained volunteers visit mums for approx. 15 months</li> </ul>                                                                                                                                                         |

1 Set information provided by local informants for each reported service included: Name of service, Narrative description, Limits on availability (eg, upper limit on number of women offered service, Location (eg, base), Level of service provision per client (eg, frequency, duration, quantity), Illustrative current caseload, Delivery setting, Client eligibility criteria, Service provider (eg, local authority), Assessment of local service variations compared to other locations

2 A government funded advisory and support service for young people aged 13-19 years old, now discontinued

3 Data collection timing: Round 1 - Data collection was requested over a six-week period from August 2009 to coincide with early stages of trial recruitment; Round 2: The survey link was sent to local FNP supervisors for completion in July 2011.

4 A tiered system of local government throughout England has responsibility for services including education, housing and Social Services. For example, across England there are 152 separate Local Education Authorities (LEAs), each of which has responsibility for providing child education in their area. The responsibility for the provision of Social Services and housing will rest with either one of the 152 principal authorities or, particularly in large urban areas, devolved to one of 326 lower tier authorities. Until April 2013 (ie, within the timeframe for the Building Blocks trial), 10 strategic health authorities existed across England, with health care provided through local NHS Primary Care and Hospital Trusts. Subsequent to the trial period and from 1st October 2015 the responsibility for commissioning public health services for children aged 0-5 transferred from NHS England to local authorities

5 Locally available services would exclude universally available services, which may be provided across all sites (whether provided specifically for women of a certain age or all women). Hence, routine midwifery care (for example) would not be reported here.

1  
2  
3 Not all universal services were reported from all sites although these would have been  
4 available (eg, universal education provision to age 16 years). In the domains of mental health,  
5 addiction and complex needs provision a small number of sites reported no additional locally  
6 available or specialist services. No sites reported specialist health visiting services for  
7 teenagers. Fourteen sites reported the employment of specialist teenage pregnancy  
8 midwives. Details from local informants describe the type and range of services available  
9 across the range of providers and sector domains. Services were numerous, complex and in  
10 some cases with fluid boundaries facilitating multi-disciplinary interaction to support users.  
11 Individual services although provided with similar intent could vary by site, while  
12 administrative boundaries between services were shown to be fluid.

### 13 *Service usage during the trial*

14 Initially 823 women were allocated to receive FNP and 822 women to Usual Care (UC) and  
15 following mandatory or elective withdrawal (including of consent), 808 and 810 women  
16 respectively completed baseline assessment.<sup>8</sup> The median ages (25<sup>th</sup> to 75<sup>th</sup> centile) of  
17 women were 17.9 (17.0 to 18.8) in the FNP arm and 17.9 (16.9 to 18.8) in the UC arm.  
18 Interviews were completed with 501 women (FNP) and 466 women (UC) at 18 months. At 24  
19 months follow-up the number of interviews completed were 595 (FNP) and 559 (UC). The first  
20 woman was recruited to the trial on June 16<sup>th</sup> 2009 and the date of the last follow-up (24  
21 month) assessment was April 24<sup>th</sup> 2013.

### 22 *Community health visiting, midwifery and FNP*

23 Core publicly funded services for mothers are maternity care and health visiting. The mean  
24 number of all home visits from health visitors was similar in both study arms (UC: 5.01 (SD  
25 5.51); FNP: 4.70 (SD 7.81)). Contact with health visitors in clinic was quite different with more  
26 reported by mothers in the UC arm (mean 6.31, SD 7.07) than in the FNP arm (0.70, SD  
27 2.92). The number of contacts within each reporting period up to 18 months reflects a similar  
28 pattern (table 2). The mean number of community midwifery contacts during pregnancy for  
29 the 422 UC women responding in late pregnancy was 10.69 (SD: 5.34) and for the 459 in the  
30 FNP arm was 10.68 (SD: 5.25). Women allocated to FNP received an average of 9.71, 18.63  
31 and 13.22 valid FN visits per programme phase (Pregnancy, Infancy, Toddlerhood) with  
32 average visit duration of 79.14 minutes. There was a programme attrition rate by phase of  
33 3.6%, 10.1% and 7.9% respectively (cumulative rate of 21.1%).  
34  
35  
36  
37  
38  
39  
40  
41  
42  
43  
44  
45  
46  
47  
48  
49  
50  
51  
52  
53  
54  
55  
56  
57  
58  
59  
60

**Table 2 Participant reported access to health services (health visitor and contraception) by follow-up (month)**

|                                              | 6            |             | 12           |             | 18           |             | Combined<br>(up to 18<br>months) |             |
|----------------------------------------------|--------------|-------------|--------------|-------------|--------------|-------------|----------------------------------|-------------|
|                                              | FNP<br>n=511 | UC<br>n=470 | FNP<br>n=514 | UC<br>n=483 | FNP<br>n=501 | UC<br>n=466 | FNP<br>n=501                     | UC<br>n=466 |
| <b>Health visitor<br/>contacts Mean (SD)</b> |              |             |              |             |              |             |                                  |             |
| Home                                         | 3.07 (6.08)  | 3.35 (3.58) | 1.24 (3.67)  | 1.16 (2.63) | 0.50 (2.50)  | 0.93 (2.58) | 4.70 (7.81)                      | 5.01 (5.51) |
| Clinic                                       | 0.51 (2.12)  | 3.72 (5.04) | 0.20 (1.37)  | 1.66 (2.76) | 0.06 (0.45)  | 1.01 (2.51) | 0.70 (2.92)                      | 6.31 (7.07) |
| <b>Contraceptive<br/>services %</b>          |              |             |              |             |              |             |                                  |             |
| GP surgery                                   | 42.3         | 38.3        | 41.2         | 44.1        | 38.5         | 46.1        |                                  |             |
| Family planning clinic                       | 26.2         | 19.8        | 19.6         | 18.6        | 22.6         | 18.7        |                                  |             |
| Children's centre                            | 1.4          | 0.6         | 1.0          | 0.8         | 1.0          | 0.4         |                                  |             |
| Sexual health clinic                         | 6.1          | 4.5         | 4.7          | 4.3         | 7.2          | 4.5         |                                  |             |

We explored variation in core service usage to determine whether level of observed support ( $\leq 3$  HV home visits /  $> 3+$  HV home visits in the first 6 months postpartum) was directed to participants distinguishable on the basis of baseline characteristics (Table 3). Women who had ever been homeless, had a higher subjectively defined social status, and poorer mental health were associated with 4 or more visits, while visit frequency also varied by trial site (but was not subsequently entered into the final model) (table 3). Homelessness (OR=1.80, 95% CI=1.02 to 3.17) and subjective social status (OR=1.13, 95% CI=1.01 to 1.27) were the only two individual characteristics that remained independently associated with visit numbers.

**Table 3 Baseline predictors of number of home visits from health visitor by six months postpartum for women in usual care arm**

|                                       | <b>3 or fewer visits<br/>(N=155)</b> |                                    | <b>4 or more visits<br/>(N=312)</b> |                                    | <b>Overall<br/>N=467</b>               | <b>Univariate<br/>assoc.<sup>g</sup></b> |
|---------------------------------------|--------------------------------------|------------------------------------|-------------------------------------|------------------------------------|----------------------------------------|------------------------------------------|
|                                       | N                                    | Median (IQR <sup>a</sup> )<br>or % | N                                   | Median (IQR <sup>a</sup> )<br>or % | Median (IQR <sup>a</sup> )<br>or N (%) |                                          |
| <b>Age in years</b>                   |                                      | 17.9<br>(17.1 – 18.7)              |                                     | 17.8<br>(16.9 – 18.9)              | 17.8<br>(16.9 – 18.8)                  | 0.721                                    |
| <b>Ethnic background</b>              |                                      |                                    |                                     |                                    |                                        | 0.070                                    |
| White                                 | 130                                  | 83.9                               | 276                                 | 88.5                               | 406 (86.9)                             |                                          |
| Mixed                                 | 5                                    | 3.2                                | 18                                  | 5.9                                | 23 (4.9)                               |                                          |
| Asian                                 | 3                                    | 1.9                                | 4                                   | 1.3                                | 7 (1.5)                                |                                          |
| Black                                 | 15                                   | 9.7                                | 13                                  | 4.2                                | 28 (6.0)                               |                                          |
| Other                                 | 2                                    | 1.3                                | 1                                   | 0.3                                | 3 (0.6)                                |                                          |
| <b>Relationship status</b>            |                                      |                                    |                                     |                                    |                                        | 0.433                                    |
| Married                               | 4                                    | 2.6                                | 3                                   | 1.0                                | 7 (1.5)                                |                                          |
| Separated                             | 13                                   | 8.4                                | 34                                  | 10.9                               | 47 (10.1)                              |                                          |
| Closely inv. / boyfriend              | 120                                  | 77.4                               | 244                                 | 78.2                               | 364 (77.9)                             |                                          |
| Just friends                          | 18                                   | 11.6                               | 31                                  | 9.9                                | 49 (10.5)                              |                                          |
| <b>Live with father of baby</b>       |                                      |                                    |                                     |                                    |                                        | 0.512                                    |
| Yes                                   | 42                                   | 27.1                               | 71                                  | 22.8                               | 113 (24.2)                             |                                          |
| No                                    | 108                                  | 69.7                               | 212                                 | 67.9                               | 320 (68.5)                             |                                          |
| Not answered                          | 5                                    | 3.2                                | 29                                  | 9.3                                | 34 (7.3)                               |                                          |
| <b>Subjective social status:</b>      |                                      |                                    |                                     |                                    |                                        |                                          |
| <b>Family</b>                         | 155                                  | 5.8<br>(5.0 – 7.0)                 | 309                                 | 5.8<br>(5.0 – 7.0)                 | 5.8<br>(5.0 – 7.0)                     | 0.896                                    |
| <b>Personal</b>                       | 154                                  | 6.8<br>(5.0 – 8.0)                 | 311                                 | 7.1<br>(6.0 – 8.0)                 | 6.7<br>(6.0 – 8.0)                     | <b>0.007<sup>g</sup></b>                 |
| <b>NEET<sup>b</sup>:</b>              | 138                                  |                                    | 266                                 |                                    |                                        | 0.210                                    |
| Yes                                   | 45                                   | 32.6                               | 105                                 | 39.5                               | 150 (37.1)                             |                                          |
| No                                    | 93                                   | 67.4                               | 161                                 | 60.5                               | 254 (62.9)                             |                                          |
| <b>Receive any benefits</b>           | 154                                  |                                    | 311                                 |                                    |                                        | 0.776                                    |
| Yes                                   | 48                                   | 31.0                               | 101                                 | 32.4                               | 149 (31.9)                             |                                          |
| No                                    | 106                                  | 68.4                               | 210                                 | 67.3                               | 316 (67.7)                             |                                          |
| Not answered                          | 1                                    | 0.6                                | 1                                   | 0.3                                | 2 (0.4)                                |                                          |
| <b>Ever been homeless</b>             |                                      |                                    |                                     |                                    |                                        | <b>0.023<sup>g</sup></b>                 |
| Yes                                   | 19                                   | 12.3                               | 65                                  | 20.8                               | 84 (18.0)                              |                                          |
| No                                    | 136                                  | 87.9                               | 247                                 | 79.2                               | 383 (82.0)                             |                                          |
| <b>Deprivation (IMDS)<sup>c</sup></b> | 154                                  | 40.4<br>(24.8 – 54.3)              | 308                                 | 38.0<br>(24.8 – 51.4)              | 38.8<br>(24.8 – 51.7)                  | 0.175                                    |
| <b>Health utility</b>                 |                                      |                                    |                                     |                                    |                                        | 0.374                                    |
| Perfect health                        | 104                                  | 67.1                               | 195                                 | 62.5                               | 299 (64.0)                             |                                          |
| Less than perfect health              | 51                                   | 32.9                               | 115                                 | 36.9                               | 166 (35.5)                             |                                          |
| Not answered                          | 0                                    | 0.0                                | 2                                   | 0.6                                | 2 (0.4)                                |                                          |
| <b>Self-rated health</b>              |                                      |                                    |                                     |                                    |                                        | 0.227                                    |
| Excellent                             | 24                                   | 15.5                               | 58                                  | 18.6                               | 82 (17.6)                              |                                          |
| Good                                  | 113                                  | 72.9                               | 200                                 | 64.1                               | 313 (67.0)                             |                                          |
| Fair                                  | 17                                   | 11.0                               | 48                                  | 15.4                               | 65 (13.9)                              |                                          |
| Poor                                  | 1                                    | 0.6                                | 6                                   | 1.9                                | 7 (1.5)                                |                                          |
| <b>Limiting chronic illness:</b>      |                                      |                                    |                                     |                                    |                                        | 0.144                                    |
| Yes                                   | 24                                   | 15.5                               | 66                                  | 21.2                               | 90 (19.3)                              |                                          |
| No                                    | 131                                  | 84.5                               | 246                                 | 78.8                               | 377 (80.7)                             |                                          |

|                                                                             |     |                       |     |                       |                       |                    |
|-----------------------------------------------------------------------------|-----|-----------------------|-----|-----------------------|-----------------------|--------------------|
| <b>Self-efficacy<sup>d</sup></b>                                            | 151 | 29.7<br>(27.0 – 32.5) | 308 | 29.9<br>(28.0 – 32.0) | 29.8<br>(27.0 – 32.0) | 0.604              |
| <b>Adaptive functioning:<br/>Difficulty in at least<br/>one basic skill</b> |     |                       |     |                       |                       | 0.674              |
| Yes                                                                         | 36  | 23.2                  | 78  | 25.0                  | 114 (24.4)            |                    |
| No                                                                          | 119 | 76.8                  | 234 | 75.0                  | 353 (75.6)            |                    |
| <b>3 or fewer key life skills</b>                                           |     |                       |     |                       |                       | 0.822              |
| Yes                                                                         | 39  | 25.2                  | 81  | 26.0                  | 120 (25.7)            |                    |
| No                                                                          | 116 | 74.8                  | 229 | 73.4                  | 345 (73.9)            |                    |
| Missing                                                                     | 0   | 0.0                   | 2   | 0.6                   | 2 (0.4)               |                    |
| <b>At least one burden</b>                                                  |     |                       |     |                       |                       | 0.080              |
| Yes                                                                         | 55  | 35.5                  | 87  | 27.9                  | 142 (30.4)            |                    |
| No                                                                          | 98  | 63.2                  | 224 | 71.8                  | 322 (69.0)            |                    |
| Missing                                                                     | 2   | 1.3                   | 1   | 0.3                   | 3 (0.6)               |                    |
| <b>Alcohol / drug use<sup>f</sup></b>                                       | 147 | 1.2<br>(0.0 – 2.0)    | 296 | 1.3<br>(0.0 – 2.0)    | 1.3<br>(0.0 – 2.0)    | 0.212              |
| <b>Antisocial behaviour</b>                                                 | 154 | 2.0<br>(1.0 – 3.0)    | 310 | 2.3<br>(1.0 – 4.0)    | 2.2<br>(1.0 – 3.0)    | 0.088              |
| <b>Social support</b>                                                       | 155 | 85.7<br>(77.0 – 98.7) | 310 | 85.8<br>(79.0 – 98.7) | 85.8<br>(77.6 – 98.7) | 0.491              |
| <b>Relationship quality</b>                                                 | 130 | 28.5<br>(26.0 – 32.0) | 255 | 28.2<br>(26.0 – 32.0) | 28.3<br>(26.0 – 32.0) | 0.433              |
| <b>Family resources</b>                                                     | 150 | 13.5<br>(11.0 – 16.0) | 296 | 13.5<br>(11.0 – 16.0) | 13.5<br>(11.0 – 16.0) | 0.884              |
| <b>Psychological distress /<br/>Mental health</b>                           | 155 | 20.3<br>(15.0 – 25.0) | 311 | 21.8<br>(17.0 – 26.0) | 21.3<br>(16.0 – 26.0) | 0.025              |
| <b>Trial site</b>                                                           |     |                       |     |                       |                       | 0.003 <sup>h</sup> |
| 1                                                                           | 1   | 0.6                   | 10  | 3.2                   | 11 (2.4)              |                    |
| 2                                                                           | 5   | 3.2                   | 8   | 2.6                   | 13 (2.8)              |                    |
| 3                                                                           | 14  | 9.0                   | 15  | 4.8                   | 29 (6.2)              |                    |
| 4                                                                           | 2   | 1.3                   | 7   | 2.2                   | 9 (1.9)               |                    |
| 5                                                                           | 8   | 5.2                   | 10  | 3.2                   | 18 (3.9)              |                    |
| 6                                                                           | 6   | 3.9                   | 7   | 2.2                   | 13 (2.8)              |                    |
| 7                                                                           | 7   | 4.5                   | 7   | 2.2                   | 14 (3.0)              |                    |
| 8                                                                           | 12  | 7.7                   | 19  | 6.1                   | 31 (6.6)              |                    |
| 9                                                                           | 13  | 8.4                   | 26  | 8.3                   | 39 (8.4)              |                    |
| 10                                                                          | 5   | 3.2                   | 17  | 5.4                   | 22 (4.7)              |                    |
| 11                                                                          | 7   | 4.5                   | 30  | 9.6                   | 37 (7.9)              |                    |
| 12                                                                          | 17  | 11.0                  | 16  | 5.1                   | 33 (7.1)              |                    |
| 13                                                                          | 7   | 4.5                   | 35  | 11.2                  | 42 (9.0)              |                    |
| 14                                                                          | 5   | 3.2                   | 3   | 1.0                   | 8 (1.7)               |                    |
| 15                                                                          | 11  | 7.1                   | 26  | 8.3                   | 37 (7.9)              |                    |
| 16                                                                          | 19  | 12.3                  | 19  | 6.1                   | 38 (8.1)              |                    |
| 17                                                                          | 8   | 5.2                   | 30  | 9.6                   | 38 (8.1)              |                    |
| 18                                                                          | 8   | 5.2                   | 27  | 8.7                   | 35 (7.5)              |                    |

*a* Interquartile range; *b* Definition of NEE: Not in education employment or training (applicable only to those whose academic age is >16 at baseline interview); *c* Higher IMD score indicated more deprivation; *d* Higher score indicates higher level of self-efficacy; *e* Higher score indicates better management of day-to-day lives and routines (for each of the three subscales); *f* CRAFFT screening test<sup>11</sup> for substance related risks and problems in adolescents; *g* italics indicate variable included in logistic regression, bold indicates variable remained significantly associated with number of visits in logistic model; *h* not modelled in regression analysis due to high number of levels; *i* The three original scale items comprised having to care for someone with long-term illness or alcohol / drug problem, feeling that they had in/sufficient privacy, living with people who respondents wished were not around

#### Other services



Participants accessed a wide range of services encompassing healthcare (table 2), housing and financial support (table 4), education, childcare and other support services including social care (table 5). A small proportion of respondents reported accessing support for housing outside of their friends and family, mostly from the local authority (table 4). The small difference in reported rates between study arms would appear to have been in part attributable to additional assistance from the FNP family nurse. Most participants reported being in receipt of additional publicly funded financial support. For most participants this included income support, housing benefit and council tax reductions with similar rates between study arms reported. Smaller proportions of participants reported other forms of financial assistance related to employment, education or personal health (eg, Jobseekers allowance). The largest difference in reported rates between study arms was for those who received regular financial support from parents: 8.9% (FNP), 15.4% (UC).

**Table 4 Participants (%) reporting housing and financial support by follow-up point (months)**

|                                        | 6            |             | 12           |             | 18           |             | 24           |             |
|----------------------------------------|--------------|-------------|--------------|-------------|--------------|-------------|--------------|-------------|
|                                        | FNP<br>n=511 | UC<br>n=470 | FNP<br>n=514 | UC<br>n=483 | FNP<br>n=501 | UC<br>n=466 | FNP<br>n=595 | UC<br>n=559 |
| <b>i) Source of housing support</b>    |              |             |              |             |              |             |              |             |
| Anyone outside of friends or family    | 18.0         | 14.9        | 12.1         | 9.9         | 9.2          | 8.4         | 12.1         | 9.7         |
| Local authority housing department     | 7.0          | 6.6         | 5.1          | 5.6         | 4.6          | 4.7         | 6.2          | 5.9         |
| Family Nurse                           | 4.1          | -           | 3.1          | -           | 2.2          | -           | 5.4          | -           |
| <b>ii) Source of financial support</b> |              |             |              |             |              |             |              |             |
| State benefits or payments             | -            | -           | -            | -           | -            | -           | 86.9         | 88.4        |
| Income support                         | -            | -           | -            | -           | -            | -           | 62.0         | 63.3        |
| Jobseekers allowance                   | -            | -           | -            | -           | -            | -           | 8.6          | 8.9         |
| Housing benefit                        | -            | -           | -            | -           | -            | -           | 64.2         | 68.5        |
| Council tax reduction                  | -            | -           | -            | -           | -            | -           | 62.9         | 63.3        |
| Disability living allowance            | -            | -           | -            | -           | -            | -           | 2.5          | 5.4         |
| Incapacity benefit                     | -            | -           | -            | -           | -            | -           | 0.7          | 1.6         |
| Child Support Agency <sup>1</sup>      | -            | -           | -            | -           | -            | -           | 12.8         | 11.6        |
| Regular support from parents           | -            | -           | -            | -           | -            | -           | 8.9          | 15.4        |
| Education grants                       | -            | -           | -            | -           | -            | -           | 5.5          | 5.9         |

<sup>1</sup> Directly or via partner

Most women seeking contraception obtained it from their general practice, and to a lesser extent from a family planning clinic. There were some small differences between study arms by time point (eg at 18 months 46.1% of women in the UC arm accessed contraception from their GP, while 38.5% in the FNP did) but overall use of this service was similar. The proportion of women accessing any education gradually increased across the duration of the trial. By 24 months about a fifth of women were in school, college or training (FNP: 22.5%, UC: 18.1%). This was mostly in mainstream education, although there were a small number of women in both trial arms accessing support in more specialised units (eg, learning support unit). A similar pattern of increasing support for childcare was observed over time with approximately a quarter of women reporting some form of childcare support used at 24 months. Support was received from a variety of sources and there appeared to be a similar pattern of usage between study arms.

**Table 5 Participants (%) reporting access to education, childcare and other support services by follow-up point (months)**

|                                         | <b>6</b>            |                    | <b>12</b>           |                    | <b>18</b>           |                    | <b>24</b>           |                    |
|-----------------------------------------|---------------------|--------------------|---------------------|--------------------|---------------------|--------------------|---------------------|--------------------|
|                                         | <i>FNP</i><br>n=511 | <i>UC</i><br>n=470 | <i>FNP</i><br>n=514 | <i>UC</i><br>n=483 | <i>FNP</i><br>n=501 | <i>UC</i><br>n=466 | <i>FNP</i><br>n=595 | <i>UC</i><br>n=559 |
| <b>i) Education attended</b>            |                     |                    |                     |                    |                     |                    |                     |                    |
| <i>Any school, college or training</i>  | 14.5                | 16.4               | 20.4                | 19.0               | 22.4                | 20.6               | 22.5                | 18.1               |
| <i>Mainstream school or college</i>     | 11.3                | 13.7               | 15.0                | 15.6               | 19.5                | 18.7               | 16.6                | 12.7               |
| <i>Learning support unit</i>            | 0.6                 | 0.2                | 0.6                 | 0.6                | 0.2                 | 0                  | 0.7                 | 0.7                |
| <i>Pupil referral unit</i>              | 0                   | 0.2                | 0                   | 0                  | 0                   | 0                  | 0                   | 0.2                |
| <i>Teenage mums support unit</i>        | 0.8                 | 1.7                | 0.6                 | 0.6                | 0.4                 | 0.6                | 0.7                 | 1.5                |
| <b>ii) Childcare accessed</b>           |                     |                    |                     |                    |                     |                    |                     |                    |
| <i>Any childcare</i>                    | 7.0                 | 7.0                | 16.1                | 13.3               | 25.5                | 21.5               | 26.9                | 24.3               |
| <i>Crèche at school or college</i>      | 4.1                 | 4.5                | 8.8                 | 6.6                | 4.8                 | 3.6                | 12.1                | 12.3               |
| <i>Day nursery at children's centre</i> | 0.8                 | 0.6                | 0                   | 0                  | 3.6                 | 2.4                | 5.5                 | 4.3                |
| <i>Child-minder</i>                     | 1.8                 | 1.1                | 2.1                 | 1.2                | 3.2                 | 2.4                | 3.2                 | 3.0                |
| <i>Other forms of childcare</i>         | 0.8                 | 0.6                | 2.1                 | 2.9                | 8.0                 | 6.9                | 6.7                 | 6.1                |
| <b>iii) Other support services</b>      |                     |                    |                     |                    |                     |                    |                     |                    |
| <i>Connexions</i>                       | 31.1                | 26.8               | 23.5                | 23.2               | 16.8                | 17.0               | *                   | *                  |
| <i>School nurse</i>                     | 1.4                 | 1.5                | 0.8                 | 0.4                | 0                   | 0.9                | 0.5                 | 0.9                |
| <i>Young People's Centre</i>            | 4.9                 | 7.0                | 2.7                 | 3.9                | 1.8                 | 1.9                | 1.8                 | 1.6                |
| <i>Family Information Centre</i>        | 2.0                 | 2.3                | 1.2                 | 1.5                | 2.2                 | 3.0                | 1.3                 | 1.4                |
| <i>Children's Centre</i>                | 36.6                | 36.6               | 25.8                | 35.6               | 28.3                | 30.0               | 34.6                | 26.7               |
| <i>Child development centre</i>         | 0.6                 | 0.6                | 0.4                 | 1.7                | 0.8                 | 1.5                | 1.0                 | 2.5                |
| <i>Crèche/ day nursery</i>              | 10.8                | 10.8               | 15.4                | 14.7               | 8.4                 | 6.0                | 17.6                | 16.6               |
| <i>Toddler group</i>                    | 7.8                 | 7.9                | 12.5                | 11.0               | 16.2                | 15.2               | 19.2                | 21.5               |
| <i>Leaving care service</i>             | 1.4                 | 0.4                | 1.8                 | 1.0                | 1.4                 | 0.6                | 2.0                 | 0.9                |
| <i>Fostering service</i>                | 0.6                 | 0.2                | 0.4                 | 0.4                | 0                   | 0.6                | 0.3                 | 0.4                |
| <i>Youth offending team</i>             | 0.8                 | 0.9                | 0.2                 | 0.2                | 0.4                 | 0                  | 0.3                 | 0                  |
| <i>Social worker</i>                    | 10.6                | 10.0               | 7.4                 | 7.5                | 8.2                 | 6.2                | 13.1                | 9.7                |
| <i>Alcohol / drug support</i>           | 0.6                 | 0                  | 0.2                 | 0.2                | 0                   | 0.4                | 0.3                 | 0.5                |

<sup>1</sup> Some respondents indicated they were in school, college or training but provided no further information

\* Not collected as service reconfigured

Various other services were accessed, the most frequent being Connexions and Children's Centres. The former was used with decreasing frequency over time (consistent with the aging profile of the sample), while the latter showed a more variable pattern of access across each time point and on occasions quite different rates of access between trial arms. At six months one in ten mothers in both trial arms reported contact with a social worker, a rate that varied over time to 24 months at which point there was only a small difference between groups (FNP: 13.1%, UC: 9.7%).

## DISCUSSION

To understand the service context within which FNP was trialled we mapped the range of services available. The multiplicity of services often within the same area and their varying labels often concealed similarities and differences between services. We established the usage of key services by trial participants across service domains. We particularly focused on those most directly relevant to the intervention (eg, health visiting) although included many other services. With mostly only small differences in usage between trial arms perhaps what is most important is the wide range of services being accessed. Although the previous US

1  
2  
3 trials have not further reported on broader services, the contexts were likely to be very  
4 different from the English trial setting.

5 FNP aims to impact upon a range of maternal and child outcomes. Therefore our selection of  
6 relevant services was necessarily broad and informed by the intervention's theory of change,  
7 which includes promoting access to services. However, previously reported attempts to map  
8 services have been challenging even when restricted to a single organisation.<sup>12</sup> To cope with  
9 such complexity researchers have sought to distinguish between specialist and generic  
10 services, including through a multi-staged approach as used here.<sup>13</sup> It has been consistently  
11 reported that information provision is time consuming for professionals (or other key  
12 informants) in such exercises, as we also found.<sup>14</sup> Individual informants may be unfamiliar  
13 with all relevant services even within their professional area, hence the coordinated approach  
14 to data gathering from multiple informants we used. Feedback from FNP staff in our process  
15 evaluation focus groups highlighted a similar challenge when acquiring knowledge about local  
16 services, essential for then linking up clients to relevant support.<sup>10</sup> Some core services such  
17 as mainstream education were not always reported and illustrates the need to clearly define  
18 the scope of the information request to informants, especially the boundaries within which  
19 they are being asked to respond. On this last point we would also clarify that many services  
20 however resourced and whether universal in availability or not, may impact upon the health  
21 and wellbeing of mother and child. We have measured for trial participants services actually  
22 used. The extent to which mothers can practically access currently unused or underused  
23 services effectively represents a key potential for future benefit if addressable barriers to  
24 accessed can be removed.

25 Our experience from this study will encourage us to further develop an approach to better  
26 understanding usual care in complex service settings. Our approach spanned an elicitation  
27 phase whereby we started by plotting a map of services and then a consolidation phase  
28 where we largely sought to confirm the contours on the map. Accordingly we took an  
29 exploratory approach for the former and a largely confirmatory approach for the latter. How  
30 either is actually done may depend on study setting and resource. The spreadsheets worked  
31 well in that they were portable and could be transferred easily to informants for completion  
32 once we had piloted them. However, an in-person semi-structured approach could have  
33 worked as well, but may have been more resource intensive. The complexity and number of  
34 services identified would have been unfeasible to include in their entirety in the trial's  
35 participant follow-up survey, but that may be important in some other studies. For example, if  
36 it was considered that sites clearly varied in provision of key services, gaining high quality  
37 information about such site characteristics could inform more informative analysis such as  
38 multi-level modelling. Finally, we initially explored the nature of available services with  
39 professionals, and only then asked mothers about services actually used via a mostly  
40 structured list of options. An exploratory exercise with mothers may well have shed light on  
41 other potential relevant services.

42 In effectiveness trials existing services could respond by augmenting support to those in the  
43 control arm. Such performance bias limits generalizability especially if that support was very  
44 different from usual care and approaching the level of support provided by the new  
45 intervention. Our findings do not indicate this in general and specifically for community  
46 midwifery and health visiting, the two most closely aligned universal services. However  
47 determining only the number of contacts may mask enhanced support provided in the form of  
48 longer contacts, or contacts from specialist practitioners. Community midwives visits were  
49 equivalent between trials arms and the difference in contacts with health visitors was  
50 attributable to clinic rather than home visits and therefore unlikely to be substantial. There  
51 was some indication that women in the usual care arm with some additional objective need  
52 identified at baseline, such as experience of homelessness, received more home visits.  
53 However, providing enhanced care to clients most in need would be usual practice. Evidence  
54 that this occurred in a trial context is not in itself a threat to external validity. The large  
55 caseloads managed by health visitors emphasises the lack of opportunity to provide  
56 significant additional support to mothers allocated to usual care.<sup>10</sup>

57 Our trial found fewer short-term benefits than previous US trials despite FNP being well  
58 implemented.<sup>1-3, 8</sup> The population we studied differed from that in the US, for example by

1  
2  
3 being fundamentally identified by maternal age and this may have contributed to some  
4 differences in impact detected. The upper age limit for women in the US trials was greater in  
5 each case than in England, and they also could have been enrolled at a later stage of  
6 gestation, for example, before delivery in Denver. In the three US trials the intervention had  
7 been provided by a total of 5 (Elmira), 12 (Memphis) and 10 (Denver) nurses in single areas  
8 with study samples of 400, 1138 and 735 women respectively. In our trial 131 nurses  
9 delivered the intervention across 18 local sites. The English service context would have been  
10 very different. Some additional standardised support in the form of developmental screening  
11 and referral, and free travel to appointments was provided to women in the control arm of  
12 each US trial. However, the broad and layered range of services identified in our study would  
13 not have been available. The broader adverse social context present in the first US trial and  
14 from which much longer-term evidence has been derived has limited direct comparison. For  
15 example, at the inception of the first US trial, Elmira was ranked bottom of all 380 US  
16 metropolitan statistical areas in terms of economic conditions. That is not to say that women  
17 in our trial were free of disadvantage or had services that fully met their needs. However,  
18 substantial differences across trial settings and the substantial duration between the trials are  
19 likely to have varied the potential for beneficial impact.

20 Service provision may change over time and any single mapping exercise will miss this real-  
21 world dynamic. We conducted telephone interviews with five FN supervisors towards the end  
22 of the trial. These explored whether there had been any key changes to local service  
23 provision. Recent major change was mostly not identified as occurring although the reduction  
24 in Connexions services was flagged up. Quantification of service use should be open to the  
25 capture of newer services. Additionally, with superficial service names not always reflecting  
26 well actual support provided it is important to look beyond service labels. Finally, high-level  
27 service descriptions do not always represent the often complex multi-professional interactions  
28 which necessarily facilitate service delivery. This emphasises the need for adequate  
29 qualitative description and interpretation of services.

30 Loss to follow-up at assessment points may introduce bias into the descriptive analysis. We  
31 have previously reported on group differences in attrition apparent at 24 months follow-up  
32 however such, differences were small.<sup>10</sup> A second consideration is the level of detail available  
33 for health visitor and midwifery contacts (eg, visit duration). It is reasonable to assume that  
34 given capacity and opportunity, women in the UC arm visited by health professionals would  
35 have received greater attention than other clients perceived as less in need. This is consistent  
36 with their professional role and reflective of contemporary best usual practice.<sup>15</sup> It is also  
37 possible that women in the FNP arm received relatively less attention than non-FNP clients if  
38 they were seen to be receiving enhanced support. Nevertheless, the total number of home  
39 and clinic visits received in both trial arms was small compared to that provided by FNP  
40 nurses. Future process evaluations should model the impact upon existing services of such  
41 service innovation to both avoid unintended consequences (eg, service displacement) and  
42 maximise synergy across services.

43 Moore and colleagues recommend primarily qualitative methods for capturing unanticipated  
44 or complex intervention pathways, which in this instance we take to be impact upon co-  
45 existing services.<sup>16</sup> They also emphasised the need to capture the mechanisms using logic  
46 models including where these reflected broader context. The extent to which an intervention's  
47 impact could actually induce harm either at the individual level or within a system can further  
48 be reflected by use of a dark logic model.<sup>17</sup> Bonell and colleagues recommend approaches to  
49 developing such a logic model, for example, by hypothesising how the agency of key  
50 stakeholders may interact with social structures to produce unintended consequences.  
51 Reflection in such model building could be informed by the use of mid-range sociological or  
52 psychological theory. This could also be combined with exploratory qualitative work with local  
53 stakeholders (eg service managers or practitioners) well placed to observe both intended and  
54 unintended intervention impacts. This is also consistent with approaches which recognise the  
55 implementation of public health interventions occurring within complex adaptive social  
56 systems, such as May's Normalisation Process Theory.<sup>18</sup> NPT identifies implementation as  
57 occurring in a dynamic, non-linear and emergent fashion. This offers a broader theoretical  
58 context within which to explore not only how one intervention becomes adapted to its  
59

1  
2  
3 environment and may vary but also how that social context and usual services may also  
4 become adapted too.

5  
6 The effectiveness of a public health intervention can only be adequately evaluated with a  
7 sound understanding of the service context within which it operates and which may also form  
8 the trial comparator.<sup>19</sup> Describing and quantifying the nature of usually available services can  
9 be challenging especially when services arise from a number of sectors, may evolve over the  
10 period of study and vary across study sites. In mapping the pattern of support potentially  
11 available to participants in our trial we have gained a critical understanding of the context  
12 within which and against which FNP should be considered. In quantifying maternal reported  
13 service usage we have provided key insights into how our main trial results should therefore  
14 be interpreted. While challenging, we remain convinced of the need to develop this area of  
15 research when evaluating public health interventions. Indeed, in their feedback survey  
16 respondents reported the usefulness of the exercise in gaining greater insights about local  
17 services, some sharing the generated service summaries with their teams.  
18  
19  
20  
21  
22  
23  
24  
25  
26  
27  
28  
29  
30  
31  
32  
33  
34  
35  
36  
37  
38  
39  
40  
41  
42  
43  
44  
45  
46  
47  
48  
49  
50  
51  
52  
53  
54  
55  
56  
57  
58  
59  
60

## ACKNOWLEDGEMENTS

The authors gratefully acknowledge the contribution of Dr Lesley Wye, University of Bristol and Dr Marie-Jet Bekkers who contributed to some of the planning and implementation of the reported study, and to all other members of the broader Building Blocks research team who supported overall trial delivery. We are grateful to each local site informant who contributed to data collection in either of the two rounds of service mapping and especially to the three local coordinators who initially piloted our mapping tool. We are also grateful to all women who participated in the trial and for their time in completing outcome and resource assessments.

## COMPETING INTERESTS

Prior to working on the Building Blocks trial, Sue Channon facilitated two workshops on Motivational Interviewing for supervisors within the FNP. The authors declare no competing interests.

## CONTRIBUTORS

MR, KH and JS conceived the study and all authors contributed to the development of its protocol. MR wrote the first draft with further contributions from all authors. RP, JS and GM were involved in data collection and management. RP was responsible for developing the survey of local stakeholders and GM was responsible for managing data collected from trial participants used in the analysis. RP, RCJ, GM and MR were involved in analysis and developing summary tables for publication. SC and JS were responsible for the management of this package of work within the trial overall. MR was responsible for obtaining study funding. All authors contributed to data interpretation, reviewed successive drafts and approved the final version of the manuscript.

## ETHICS

The trial was approved by the Wales NHS Research Ethics Committee (09/MRE09/08) and received governance approval from all participating NHS sites. All women provided written informed consent.

## PARTICIPANT CONSENT

All participants provided written informed consent to take part in the study.

## FUNDING

The Centre for Trials Research, Cardiff University is funded by the Welsh Government through Health and Care Research Wales and the authors gratefully acknowledge the Centre's contribution to study implementation. This is an independent report commissioned, sponsored and funded by the Policy Research Programme in the Department of Health (reference no. 006/0060). The views expressed are not necessarily those of the Department of Health.

## DATA SHARING

The datasets generated and analysed during the current study are not publicly available as contributors / participants may be identifiable and are also subject to sponsor approval, but may be available from the corresponding author on reasonable request.

## References

1. Olds DL, Henderson CR, Jr., Chamberlin R, Tatelbaum R. Preventing child abuse and neglect: a randomized trial of nurse home visitation. *Pediatrics* 1986; 78 (1): 65-78.
2. Kitzman H, Olds DL, Henderson CR, Jr., et al. Effect of Prenatal and Infancy Home Visitation by Nurses On Pregnancy Outcomes, Childhood Injuries, and Repeated Childbearing: A Randomised Controlled Trial. *JAMA* 1997; 278 (8): 644-52.
3. Olds DL, Robinson J, O'Brien R, et al. Home Visiting by Paraprofessionals and by Nurses: A Randomized, Controlled Trial. *Pediatrics* 2002; 110 (3): 486-96.
4. Barnes J, Ball M, Meadows P et al. Nurse-Family Partnership Programme: First Year Pilot Sites Implementation in England - Pregnancy and the Post-partum Period. London: Birkbeck, University of London; 2008.
5. Barnes J, Ball M, Meadows P et al. Nurse-Family Partnership Programme: Second Year Pilot Sites Implementation in England - The Infancy Period. London: Birkbeck, University of London; 2009.
6. Barnes J, Ball M, Meadows P, et al. The Family-Nurse Partnership Programme in England: Wave 1 implementation in toddlerhood & a comparison between Waves 1 and 2a of implementation in pregnancy and infancy. London: Institute for the Study of Children, Families and Social Issues: Birkbeck, University of London, 2011.
7. Owen-Jones E, Bekkers M-J, Butler CC, et al. The effectiveness and cost-effectiveness of the Family Nurse Partnership home visiting programme for first time teenage mothers in England: a protocol for the Building Blocks randomised controlled trial. *BMC Pediatrics* 2013; 13 (1): 114.
8. Robling M, Bekkers M-J, Bell K, et al. Effectiveness of a nurse-led intensive home-visitaton programme for first-time teenage mothers (Building Blocks): a pragmatic randomised controlled trial. *Lancet* 2015; published online Oct 14. [http://dx.doi.org/10.1016/S0140-6736\(15\)00392-X](http://dx.doi.org/10.1016/S0140-6736(15)00392-X).
9. NVivo qualitative data analysis Software; QSR International Pty Ltd. Version 8, 2008
10. Robling MR Bekkers M-J, Bell K et al. Evaluating the Family Nurse Partnership Programme in England: A Randomised Controlled Trial. Final report to The Department of Health. 2015. (<http://bit.ly/buildingblockstrial>).
11. Knight JR, Sherritt L, Shrier LA et al Validity of the CRAFFT substance abuse screening test among adolescent clinic patients. *Arch Pediatr Adolesc Med* 2002, 156(6):607–614.[CRAFFT].
12. Hotopf M, Rayner L, Valsraj K. Improving 'Whole Person Care' A report on mental health related services offered by King's Health Partners' acute trusts: King's Health Partners, 2012.
13. Challis D, Darton R, Donnelly M et al. Mapping and evaluation of care management arrangements for older people and those with menatal health problems in an integrated health and social services system: a comparative study: The Personal Social Services Research Unit, 1999.
14. Health Do. Children's services mapping. A complete picture of children's service provision: Department of Health. Department for Children Schools and Families, 2010.
15. NICE. Pregnancy and complex social factors: A model for service provision for pregnant women with complex social factors. London, 2010.
16. Moore GF, Audrey S, Barker M, Bond L, Bonell C, Hardeman W, Moore L, O'Cathain A, Tinati T, Wight D, Baird J. Process evaluation of complex interventions: Medical Research Council guidance. *BMJ* 2015;350:h1258 doi:10.1136/bmj.h1258
17. Bonell C, Jamal F, Melendez-Torres GJ, Cummins S. 'Dark logic': theorising the harmful consequences of public health interventions. *Epidemiol Community Health* 2015;69:95–98.
18. May CR, Johnson M, Finch T. Implementation, context and complexity. *Implementation Science* (2016) 11:141
19. Smelt AFH, van der Weele GM, Blom JW et al. How usual is usual care in pragmatic intervention studies in primary care? An overview of recent trials. *British Journal of General Practice* 2010 e305.

## Appendix 1

## Example of service mapping content / user instructions from 'Education' worksheet

| <i>Please describe services available for teenage, first-time mothers in your area</i> | <b>Name of service (If applicable)</b>                                                                         | <b>Description of service / Care</b>                                                                                                                          | <b>Are there any limits on the availability of this service? E.g., Number of women that can be offered the service</b>                   |
|----------------------------------------------------------------------------------------|----------------------------------------------------------------------------------------------------------------|---------------------------------------------------------------------------------------------------------------------------------------------------------------|------------------------------------------------------------------------------------------------------------------------------------------|
| <b>Is there a Mother and Baby hostel in your area?</b>                                 | Mother and baby hostels                                                                                        | Dedicated hostels for homeless women who are pregnant or have a new baby. Additional support both from trained staff                                          | Some will take young women in the early stages of pregnancy (up to 6 months approx). Some will not house pregnant women, or young babies |
| <b>What temporary accommodation can be offered?</b>                                    | Hostels                                                                                                        | Temporary accommodation with varying degrees of support, usually containing some shared facilities                                                            | Most require assessment of eligibility and suitability. Not usually suitable for those under 18, or youths with offending behaviour.     |
| <b>Temporary accommodation (for the temporary homeless)?</b>                           | Emergency hostels and night shelters (or bed and breakfasts if nothing else is available - usu max of 6 weeks) | Offer somewhere to sleep, food, warmth and hygiene. Residents are normally asked to pay a small additional contribution for their meals.                      | Usually a direct access/first-come-first served basis. Night shelters are usually free. Most hostels charge.                             |
| <b>Charity involvement?</b>                                                            | LIFE Housing                                                                                                   | Provides a support service (General Support, Individual Support Plans and the LIFE Skills Programme) and community outreach schemes                           | (Not specified)                                                                                                                          |
| <b>Foyers</b>                                                                          | Foyers                                                                                                         | Integration of accommodation and support services: training in basic/independent living skills, inc. ongoing support when the young person has left the Foyer | Most foyers have a waiting list. Some foyers only accept referrals from local councils                                                   |
| <b>Women's refuges</b>                                                                 | Women's refuges                                                                                                | A refuge is a safe house where women and children who are experiencing domestic violence can stay free from abuse                                             | Refuges are highly unlikely to accept women from their immediate local area. Some are for women w/ part' ethnic/cultural backgrounds     |
| <b>Housing Associations / RSLs (Registered Social Landlords)</b>                       | Housing associations / RSLs (Registered Social Landlords)                                                      | Provide homes for people on low incomes. Some housing associations specialise in accommodation for particular groups of people, such as younger people        | Long waiting list. Chance of place/waiting time depends on personal circumstances (e.g. children), and other factors                     |
| <b>Supported lodgings schemes</b>                                                      | Supported lodgings                                                                                             | Individuals in the community offer a room in their home with varying degrees of support. A safe and supportive environment for young people                   | Suitable for youths: leaving care, deemed vulnerable and in need, requiring temp acc, or with no statutory entitlement to housing        |



|    |                              |                                                                                 |                                                                                                                                                                                                                                                      |                                                                                                                                                                                                                         |
|----|------------------------------|---------------------------------------------------------------------------------|------------------------------------------------------------------------------------------------------------------------------------------------------------------------------------------------------------------------------------------------------|-------------------------------------------------------------------------------------------------------------------------------------------------------------------------------------------------------------------------|
| 1  | <b>Supported housing</b>     | Self-contained, cluster and shared arrangements with varying degrees of support | Supported housing will usually provide housing-related support to help a young person prepare for independent living                                                                                                                                 | Many schemes accessible via social services' leaving care arrangements, and via housing departments for young homeless people                                                                                           |
| 2  |                              |                                                                                 |                                                                                                                                                                                                                                                      |                                                                                                                                                                                                                         |
| 3  |                              |                                                                                 |                                                                                                                                                                                                                                                      |                                                                                                                                                                                                                         |
| 4  | <b>Mainstream housing</b>    | Independent accommodation                                                       | Independent accommodation. Housing & social services may have arrangements w/ private landlords to provide accommodation for vulnerable youths                                                                                                       | Housing benefit restrictions apply to under 25s living in the private sector and applicants are limited to the single-room rent housing benefit level                                                                   |
| 5  |                              |                                                                                 |                                                                                                                                                                                                                                                      |                                                                                                                                                                                                                         |
| 6  |                              |                                                                                 |                                                                                                                                                                                                                                                      |                                                                                                                                                                                                                         |
| 7  |                              |                                                                                 |                                                                                                                                                                                                                                                      |                                                                                                                                                                                                                         |
| 8  | <b>Nightstop schemes</b>     | Emergency accommodation (Depaul Nightstop UK)                                   | Nightstop schemes provide emergency accommodation for young homeless people aged 16–25 in the homes of a network of volunteer hosts                                                                                                                  | Referrals to service after risk assessments by a recognised agency; such as social services, Connexions, police, housing depts                                                                                          |
| 9  |                              |                                                                                 |                                                                                                                                                                                                                                                      |                                                                                                                                                                                                                         |
| 10 |                              |                                                                                 |                                                                                                                                                                                                                                                      |                                                                                                                                                                                                                         |
| 11 |                              |                                                                                 |                                                                                                                                                                                                                                                      |                                                                                                                                                                                                                         |
| 12 | <b>Supported housing</b>     | Supported housing schemes                                                       | Housing schemes offering accommodation linked with on-site or outreach support from dedicated staff (practical and emotional help)                                                                                                                   | Schemes vary in size                                                                                                                                                                                                    |
| 13 |                              |                                                                                 |                                                                                                                                                                                                                                                      |                                                                                                                                                                                                                         |
| 14 |                              |                                                                                 |                                                                                                                                                                                                                                                      |                                                                                                                                                                                                                         |
| 15 |                              |                                                                                 |                                                                                                                                                                                                                                                      |                                                                                                                                                                                                                         |
| 16 |                              |                                                                                 |                                                                                                                                                                                                                                                      |                                                                                                                                                                                                                         |
| 17 | <b>Custodial institution</b> | Secure Children's Homes                                                         | Concentrate on physical, emotional, behavioural needs, & aim to give youths individually tailored support to resolve the issues that led them to commit an offence                                                                                   | These are relatively small institutions, with between 6 and 40 beds and a high staff to young person ratio                                                                                                              |
| 18 |                              |                                                                                 |                                                                                                                                                                                                                                                      |                                                                                                                                                                                                                         |
| 19 |                              |                                                                                 |                                                                                                                                                                                                                                                      |                                                                                                                                                                                                                         |
| 20 |                              |                                                                                 |                                                                                                                                                                                                                                                      |                                                                                                                                                                                                                         |
| 21 | <b>Floating support</b>      | Floating support services                                                       | To sustain a tenancy through the dev' of independent living skills. Provides general, non-specialist support with daily living skills, practical tasks or emotional support which promotes or maintains a person's ability to live in their own home | Reviews of the progress and support plan ensure that the services adjust appropriately to changing needs. An exit strategy determines when support is withdrawn. If a person needs support later, it can return to them |
| 22 |                              |                                                                                 |                                                                                                                                                                                                                                                      |                                                                                                                                                                                                                         |
| 23 |                              |                                                                                 |                                                                                                                                                                                                                                                      |                                                                                                                                                                                                                         |
| 24 |                              |                                                                                 |                                                                                                                                                                                                                                                      |                                                                                                                                                                                                                         |
| 25 |                              |                                                                                 |                                                                                                                                                                                                                                                      |                                                                                                                                                                                                                         |
| 26 |                              |                                                                                 |                                                                                                                                                                                                                                                      |                                                                                                                                                                                                                         |
| 27 |                              |                                                                                 |                                                                                                                                                                                                                                                      |                                                                                                                                                                                                                         |

## Building Blocks Service Mapping Report

STROBE Statement—checklist of items that should be included in reports of observational<sup>1</sup> studies

|                              | Item No | Recommendation                                                                                                                                                                                                                                                                                                                                                                                                                                                         | Page       |
|------------------------------|---------|------------------------------------------------------------------------------------------------------------------------------------------------------------------------------------------------------------------------------------------------------------------------------------------------------------------------------------------------------------------------------------------------------------------------------------------------------------------------|------------|
| <b>Title and abstract</b>    | 1       | (a) Indicate the study's design with a commonly used term in the title or the abstract                                                                                                                                                                                                                                                                                                                                                                                 | 1          |
|                              |         | (b) Provide in the abstract an informative and balanced summary of what was done and what was found                                                                                                                                                                                                                                                                                                                                                                    | 2          |
| <b>Introduction</b>          |         |                                                                                                                                                                                                                                                                                                                                                                                                                                                                        |            |
| Background/rationale         | 2       | Explain the scientific background and rationale for the investigation being reported                                                                                                                                                                                                                                                                                                                                                                                   | 3          |
| Objectives                   | 3       | State specific objectives, including any prespecified hypotheses                                                                                                                                                                                                                                                                                                                                                                                                       | 3          |
| <b>Methods</b>               |         |                                                                                                                                                                                                                                                                                                                                                                                                                                                                        |            |
| Study design                 | 4       | Present key elements of study design early in the paper                                                                                                                                                                                                                                                                                                                                                                                                                | 3, 4       |
| Setting                      | 5       | Describe the setting, locations, and relevant dates, including periods of recruitment, exposure, follow-up, and data collection                                                                                                                                                                                                                                                                                                                                        | 4, 5, 6, 9 |
| Participants                 | 6       | (a) <i>Cohort study</i> —Give the eligibility criteria, and the sources and methods of selection of participants. Describe methods of follow-up<br><i>Case-control study</i> —Give the eligibility criteria, and the sources and methods of case ascertainment and control selection. Give the rationale for the choice of cases and controls<br><i>Cross-sectional study</i> —Give the eligibility criteria, and the sources and methods of selection of participants | 5          |
|                              |         | (b) <i>Cohort study</i> —For matched studies, give matching criteria and number of exposed and unexposed<br><i>Case-control study</i> —For matched studies, give matching criteria and the number of controls per case                                                                                                                                                                                                                                                 | NA         |
| Variables                    | 7       | Clearly define all outcomes, exposures, predictors, potential confounders, and effect modifiers. Give diagnostic criteria, if applicable                                                                                                                                                                                                                                                                                                                               | 10-14      |
| Data sources/<br>measurement | 8*      | For each variable of interest, give sources of data and details of methods of assessment (measurement). Describe comparability of assessment methods if there is more than one group                                                                                                                                                                                                                                                                                   | 10-14      |
| Bias                         | 9       | Describe any efforts to address potential sources of bias                                                                                                                                                                                                                                                                                                                                                                                                              | NA         |
| Study size                   | 10      | Explain how the study size was arrived at                                                                                                                                                                                                                                                                                                                                                                                                                              | 4          |
| Quantitative variables       | 11      | Explain how quantitative variables were handled in the analyses. If applicable, describe which groupings were chosen and why                                                                                                                                                                                                                                                                                                                                           | 5          |
| Statistical methods          | 12      | (a) Describe all statistical methods, including those used to control for confounding                                                                                                                                                                                                                                                                                                                                                                                  | 5          |
|                              |         | (b) Describe any methods used to examine subgroups and interactions                                                                                                                                                                                                                                                                                                                                                                                                    | NA         |
|                              |         | (c) Explain how missing data were addressed                                                                                                                                                                                                                                                                                                                                                                                                                            | 9*         |
|                              |         | (d) <i>Cohort study</i> —If applicable, explain how loss to follow-up was addressed<br><i>Case-control study</i> —If applicable, explain how matching of cases and controls was addressed<br><i>Cross-sectional study</i> —If applicable, describe analytical methods taking                                                                                                                                                                                           | NA         |

|                                       |    |
|---------------------------------------|----|
| account of sampling strategy          |    |
| (e) Describe any sensitivity analyses | NA |

| <b>Results</b>           |     |                                                                                                                                                                                                              |                  |
|--------------------------|-----|--------------------------------------------------------------------------------------------------------------------------------------------------------------------------------------------------------------|------------------|
| Participants             | 13* | (a) Report numbers of individuals at each stage of study—eg numbers potentially eligible, examined for eligibility, confirmed eligible, included in the study, completing follow-up, and analysed            | 9*               |
|                          |     | (b) Give reasons for non-participation at each stage                                                                                                                                                         | 9*               |
|                          |     | (c) Consider use of a flow diagram                                                                                                                                                                           | 9*               |
| Descriptive data         | 14* | (a) Give characteristics of study participants (eg demographic, clinical, social) and information on exposures and potential confounders                                                                     | 9*               |
|                          |     | (b) Indicate number of participants with missing data for each variable of interest                                                                                                                          | 10-14            |
|                          |     | (c) <i>Cohort study</i> —Summarise follow-up time (eg, average and total amount)                                                                                                                             | 10-14            |
| Outcome data             | 15* | <i>Cohort study</i> —Report numbers of outcome events or summary measures over time                                                                                                                          | 10-14            |
|                          |     | <i>Case-control study</i> —Report numbers in each exposure category, or summary measures of exposure                                                                                                         | -                |
|                          |     | <i>Cross-sectional study</i> —Report numbers of outcome events or summary measures                                                                                                                           | -                |
| Main results             | 16  | (a) Give unadjusted estimates and, if applicable, confounder-adjusted estimates and their precision (eg, 95% confidence interval). Make clear which confounders were adjusted for and why they were included | 10-14            |
|                          |     | (b) Report category boundaries when continuous variables were categorized                                                                                                                                    | NA               |
|                          |     | (c) If relevant, consider translating estimates of relative risk into absolute risk for a meaningful time period                                                                                             | NA               |
| Other analyses           | 17  | Report other analyses done—eg analyses of subgroups and interactions, and sensitivity analyses                                                                                                               | NA               |
| <b>Discussion</b>        |     |                                                                                                                                                                                                              |                  |
| Key results              | 18  | Summarise key results with reference to study objectives                                                                                                                                                     | 14,15            |
| Limitations              | 19  | Discuss limitations of the study, taking into account sources of potential bias or imprecision. Discuss both direction and magnitude of any potential bias                                                   | 15,16            |
| Interpretation           | 20  | Give a cautious overall interpretation of results considering objectives, limitations, multiplicity of analyses, results from similar studies, and other relevant evidence                                   | 14,<br>15,<br>17 |
| Generalisability         | 21  | Discuss the generalisability (external validity) of the study results                                                                                                                                        | 16               |
| <b>Other information</b> |     |                                                                                                                                                                                                              |                  |
| Funding                  | 22  | Give the source of funding and the role of the funders for the present study and, if applicable, for the original study on which the present article is based                                                | 18               |

1 The paper reports an analysis from the process evaluation (including descriptive analysis of service usage data) from a cohort of women participating in a randomised control trial

\* Citation to full main trial report included in text
