# Supplementary material for: What is usual care for teenagers expecting their first child in England? A process evaluation using key informant mapping and participant survey as part of the Building Blocks randomised controlled trial of specialist home visiting
Source: PubMed Central journal article supplement (PMC5942429; doi:10.1136/bmjopen-2017-020152), 2018-05-05
Supplement: bmjopen-2017-020152supp001.pdf [file bmjopen-2017-020152supp001.pdf]

## Appendix 1

### Example of service mapping content / user instructions from 'Education' worksheet

| <b><i>Please describe services available for teenage, first-time mothers in your area</i></b> | <b>Name of service (If applicable)</b>                                                                         | <b>Description of service / Care</b>                                                                                                                          | <b>Are there any limits on the availability of this service? E.g., Number of women that can be offered the service</b>                   |
|-----------------------------------------------------------------------------------------------|----------------------------------------------------------------------------------------------------------------|---------------------------------------------------------------------------------------------------------------------------------------------------------------|------------------------------------------------------------------------------------------------------------------------------------------|
| <b><i>Is there a Mother and Baby hostel in your area?</i></b>                                 | Mother and baby hostels                                                                                        | Dedicated hostels for homeless women who are pregnant or have a new baby. Additional support both from trained staff                                          | Some will take young women in the early stages of pregnancy (up to 6 months approx). Some will not house pregnant women, or young babies |
| <b><i>What temporary accommodation can be offered?</i></b>                                    | Hostels                                                                                                        | Temporary accommodation with varying degrees of support, usually containing some shared facilities                                                            | Most require assessment of eligibility and suitability. Not usually suitable for those under 18, or youths with offending behaviour.     |
| <b><i>Temporary accommodation (for the temporary homeless)?</i></b>                           | Emergency hostels and night shelters (or bed and breakfasts if nothing else is available - usu max of 6 weeks) | Offer somewhere to sleep, food, warmth and hygiene. Residents are normally asked to pay a small additional contribution for their meals.                      | Usually a direct access/first-come-first served basis. Night shelters are usually free. Most hostels charge.                             |
| <b><i>Charity involvement?</i></b>                                                            | LIFE Housing                                                                                                   | Provides a support service (General Support, Individual Support Plans and the LIFE Skills Programme) and community outreach schemes                           | (Not specified)                                                                                                                          |
| <b><i>Foyers</i></b>                                                                          | Foyers                                                                                                         | Integration of accommodation and support services: training in basic/independent living skills, inc. ongoing support when the young person has left the Foyer | Most foyers have a waiting list. Some foyers only accept referrals from local councils                                                   |
| <b><i>Women's refuges</i></b>                                                                 | Women's refuges                                                                                                | A refuge is a safe house where women and children who are experiencing domestic violence can stay free from abuse                                             | Refuges are highly unlikely to accept women from their immediate local area. Some are for women w/ part' ethnic/cultural backgrounds     |
| <b><i>Housing Associations / RSLs (Registered Social Landlords)</i></b>                       | Housing associations / RSLs (Registered Social Landlords)                                                      | Provide homes for people on low incomes. Some housing associations specialise in accommodation for particular groups of people, such as younger people        | Long waiting list. Chance of place/waiting time depends on personal circumstances (e.g. children), and other factors                     |
| <b><i>Supported lodgings schemes</i></b>                                                      | Supported lodgings                                                                                             | Individuals in the community offer a room in their home with varying degrees of support. A safe and supportive environment for young people                   | Suitable for youths: leaving care, deemed vulnerable and in need, requiring temp acc, or with no statutory entitlement to housing        |

|                              |                                                                                 |                                                                                                                                                                                                                                                      |                                                                                                                                                                                                                         |
|------------------------------|---------------------------------------------------------------------------------|------------------------------------------------------------------------------------------------------------------------------------------------------------------------------------------------------------------------------------------------------|-------------------------------------------------------------------------------------------------------------------------------------------------------------------------------------------------------------------------|
| <b>Supported housing</b>     | Self-contained, cluster and shared arrangements with varying degrees of support | Supported housing will usually provide housing-related support to help a young person prepare for independent living                                                                                                                                 | Many schemes accessible via social services' leaving care arrangements, and via housing departments for young homeless people                                                                                           |
| <b>Mainstream housing</b>    | Independent accommodation                                                       | Independent accommodation. Housing & social services may have arrangements w/ private landlords to provide accommodation for vulnerable youths                                                                                                       | Housing benefit restrictions apply to under 25s living in the private sector and applicants are limited to the single-room rent housing benefit level                                                                   |
| <b>Nightstop schemes</b>     | Emergency accommodation (Depaul Nightstop UK)                                   | Nightstop schemes provide emergency accommodation for young homeless people aged 16–25 in the homes of a network of volunteer hosts                                                                                                                  | Referrals to service after risk assessments by a recognised agency; such as social services, Connexions, police, housing depts                                                                                          |
| <b>Supported housing</b>     | Supported housing schemes                                                       | Housing schemes offering accommodation linked with on-site or outreach support from dedicated staff (practical and emotional help)                                                                                                                   | Schemes vary in size                                                                                                                                                                                                    |
| <b>Custodial institution</b> | Secure Children's Homes                                                         | Concentrate on physical, emotional, behavioural needs, & aim to give youths individually tailored support to resolve the issues that led them to commit an offence                                                                                   | These are relatively small institutions, with between 6 and 40 beds and a high staff to young person ratio                                                                                                              |
| <b>Floating support</b>      | Floating support services                                                       | To sustain a tenancy through the dev' of independent living skills. Provides general, non-specialist support with daily living skills, practical tasks or emotional support which promotes or maintains a person's ability to live in their own home | Reviews of the progress and support plan ensure that the services adjust appropriately to changing needs. An exit strategy determines when support is withdrawn. If a person needs support later, it can return to them |
